# Supplementary material for: Changes in healthcare spending attributable to obesity and overweight: payer- and service-specific estimates
Source: Springer Nature journal article supplement (doi:10.1186/s12889-022-13176-y), 2022-05-13
Supplement: MOESM1 [file 20400074]

|              | (1)<br>outpatient<br>Coef./std.errors | (2)<br>Coef./std.errors |
|--------------|---------------------------------------|-------------------------|
| main         |                                       |                         |
| overweight   | 0.0142<br>(0.0959)                    |                         |
| obese        | 0.3695***<br>(0.1111)                 |                         |
| unins        | -0.9198***<br>(0.1014)                |                         |
| medicaid     | 0.4907***<br>(0.1732)                 |                         |
| medicare     | 0.4293<br>(0.5197)                    |                         |
| female       | 0.9185***<br>(0.0865)                 |                         |
| smoker       | 0.2206**<br>(0.1059)                  |                         |
| married      | 0.2741***<br>(0.0909)                 |                         |
| black        | -0.0944<br>(0.1577)                   |                         |
| amind        | -0.2763<br>(0.2246)                   |                         |
| asian        | 0.3910***<br>(0.1203)                 |                         |
| othrace      | 0.0000<br>(.)                         |                         |
| midwest      | -0.0658<br>(0.1328)                   |                         |
| south        | -0.1722<br>(0.1236)                   |                         |
| west         | -0.1135<br>(0.1354)                   |                         |
| lesshischool | -0.0153<br>(0.1213)                   |                         |
| collegeplus  | 0.2936***<br>(0.1037)                 |                         |
| poor         | 0.1079<br>(0.1570)                    |                         |
| nearpoor     | 0.3025<br>(0.2235)                    |                         |
| middleinc    | 0.0277<br>(0.1330)                    |                         |
| highinc      | 0.1184<br>(0.1426)                    |                         |

|             |                       |                               |
|-------------|-----------------------|-------------------------------|
| _bs_1       |                       | 2.9852e+09***<br>(1.0234e+09) |
| _bs_2       |                       | 0.0847***<br>(0.0277)         |
| _cons       | 5.2827***<br>(0.2116) |                               |
| No. of Obs. | 5848.0000             | 5848.0000                     |
| R-Squared   |                       |                               |

|              | (1)<br>inpatient<br>Coef./std.errors | (2)<br>Coef./std.errors |
|--------------|--------------------------------------|-------------------------|
| main         |                                      |                         |
| overweight   | 0.3188**<br>(0.1274)                 |                         |
| obese        | 0.3504***<br>(0.1290)                |                         |
| unins        | -0.4889***<br>(0.1501)               |                         |
| medicaid     | 0.6736***<br>(0.1591)                |                         |
| medicare     | 0.7689*<br>(0.4022)                  |                         |
| female       | 1.7721***<br>(0.1527)                |                         |
| smoker       | -0.1062<br>(0.1398)                  |                         |
| married      | 0.6839***<br>(0.1102)                |                         |
| black        | -0.1335<br>(0.1670)                  |                         |
| amind        | 0.1889<br>(0.3108)                   |                         |
| asian        | 0.0560<br>(0.1408)                   |                         |
| othrace      | 0.0000<br>(.)                        |                         |
| midwest      | 0.1316<br>(0.1928)                   |                         |
| south        | 0.1987<br>(0.1753)                   |                         |
| west         | -0.1588<br>(0.1868)                  |                         |
| lesshischool | -0.1058<br>(0.1345)                  |                         |
| collegeplus  | -0.0341<br>(0.1338)                  |                         |
| poor         | 0.5598***<br>(0.1603)                |                         |
| nearpoor     | 0.0143<br>(0.2299)                   |                         |
| middleinc    | -0.1078<br>(0.1687)                  |                         |
| highinc      | -0.3854*<br>(0.1997)                 |                         |

|              |                              |                              |
|--------------|------------------------------|------------------------------|
| _bs_1        |                              | 3.1721e+09**<br>(1.4084e+09) |
| _bs_2        |                              | 0.0944**<br>(0.0405)         |
| _cons        | -4.3375***<br>(0.2869)       |                              |
| <hr/>        |                              |                              |
| glm          |                              |                              |
| overweight   | 852.8192<br>(1269.4494)      |                              |
| obese        | 877.0597<br>(1272.4061)      |                              |
| unins        | -3793.8168**<br>(1608.6482)  |                              |
| medicaid     | -1825.1314<br>(1545.4380)    |                              |
| medicare     | 7227.2773**<br>(3663.3823)   |                              |
| female       | -5159.5896***<br>(1658.6007) |                              |
| smoker       | 70.3581<br>(1487.6374)       |                              |
| married      | 434.1625<br>(1198.9775)      |                              |
| black        | 3143.6703*<br>(1671.1615)    |                              |
| amind        | -1114.6730<br>(3208.3186)    |                              |
| asian        | 1187.6286<br>(1461.1929)     |                              |
| othrace      | 0.0000<br>(.)                |                              |
| midwest      | -1634.2903<br>(1939.3854)    |                              |
| south        | -1551.9261<br>(1782.3810)    |                              |
| west         | 33.6626<br>(1869.5516)       |                              |
| lesshischool | 2083.3418<br>(1329.2047)     |                              |
| collegeplus  | -1174.9257<br>(1336.6689)    |                              |
| poor         | -80.9104<br>(1624.0386)      |                              |
| nearpoor     | 5930.7125**<br>(2334.2632)   |                              |
| middleinc    | 2261.3042                    |                              |

|             |               |           |
|-------------|---------------|-----------|
|             | (1715.7756)   |           |
| highinc     | 4550.3952**   |           |
|             | (2008.2560)   |           |
| _cons       | 11407.3418*** |           |
|             | (2746.0026)   |           |
| <hr/>       |               |           |
| No. of Obs. | 5848.0000     | 5848.0000 |
| R-Squared   |               |           |
| <hr/>       |               |           |

|              | (1)<br>inpatient<br>Coef./std.errors | (2)<br>Coef./std.errors |
|--------------|--------------------------------------|-------------------------|
| main         |                                      |                         |
| overweight   | 0.2002<br>(0.1989)                   |                         |
| obese        | 0.8319***<br>(0.1812)                |                         |
| unins        | -0.2825<br>(0.2083)                  |                         |
| medicaid     | 0.4012*<br>(0.2369)                  |                         |
| medicare     | 1.2547***<br>(0.2935)                |                         |
| female       | 0.7683***<br>(0.1601)                |                         |
| smoker       | 0.1365<br>(0.1778)                   |                         |
| married      | 0.0640<br>(0.1637)                   |                         |
| black        | 0.2621<br>(0.2566)                   |                         |
| amind        | 0.7167**<br>(0.3598)                 |                         |
| asian        | 0.3627*<br>(0.2166)                  |                         |
| othrace      | 0.0000<br>(.)                        |                         |
| midwest      | 0.3720<br>(0.2382)                   |                         |
| south        | -0.0164<br>(0.2315)                  |                         |
| west         | -0.0246<br>(0.2470)                  |                         |
| lesshischool | 0.2243<br>(0.2159)                   |                         |
| collegeplus  | 0.1927<br>(0.1801)                   |                         |
| poor         | -0.0163<br>(0.2415)                  |                         |
| nearpoor     | -0.0635<br>(0.3307)                  |                         |
| middleinc    | -0.3384<br>(0.2250)                  |                         |
| highinc      | -0.2843<br>(0.2444)                  |                         |

|              |                             |                               |
|--------------|-----------------------------|-------------------------------|
| _bs_1        |                             | 7.7628e+09***<br>(2.5552e+09) |
| _bs_2        |                             | 0.3154***<br>(0.0924)         |
| _cons        | -4.1216***<br>(0.4102)      |                               |
| <hr/>        |                             |                               |
| glm          |                             |                               |
| overweight   | 1684.0910<br>(3313.8903)    |                               |
| obese        | 2990.0399<br>(3166.1976)    |                               |
| unins        | -5774.5219<br>(3603.5567)   |                               |
| medicaid     | 345.1821<br>(4074.6451)     |                               |
| medicare     | 10725.3856**<br>(4360.7032) |                               |
| female       | -5691.2832**<br>(2586.6656) |                               |
| smoker       | 7140.4047**<br>(3021.4195)  |                               |
| married      | 6888.2930**<br>(2965.8311)  |                               |
| black        | -563.5131<br>(4273.1068)    |                               |
| amind        | -5033.7443<br>(5901.5116)   |                               |
| asian        | -4264.2046<br>(3587.4922)   |                               |
| othrace      | 0.0000<br>(.)               |                               |
| midwest      | 6827.7689*<br>(3902.8600)   |                               |
| south        | 3035.7154<br>(3745.6863)    |                               |
| west         | 8826.7765**<br>(3956.9235)  |                               |
| lesshischool | 2100.3848<br>(3537.4515)    |                               |
| collegeplus  | 4238.9668<br>(3172.2222)    |                               |
| poor         | 1949.2996<br>(3907.1575)    |                               |
| nearpoor     | 6290.9965<br>(5249.4572)    |                               |
| middleinc    | 751.9616                    |                               |

|             |             |           |
|-------------|-------------|-----------|
|             | (3671.3290) |           |
| highinc     | 2136.2558   |           |
|             | (3909.2107) |           |
| _cons       | 2195.4252   |           |
|             | (6424.2101) |           |
| <hr/>       |             |           |
| No. of Obs. | 3885.0000   | 3885.0000 |
| R-Squared   |             |           |
| <hr/>       |             |           |



|              | (1)<br>inpatient<br>Coef./std.errors | (2)<br>Coef./std.errors |
|--------------|--------------------------------------|-------------------------|
| main         |                                      |                         |
| overweight   | 0.0407<br>(0.1657)                   |                         |
| obese        | 0.1778<br>(0.1600)                   |                         |
| unins        | -0.0659<br>(0.1942)                  |                         |
| medicaid     | 0.8443***<br>(0.2190)                |                         |
| medicare     | 0.5240**<br>(0.2254)                 |                         |
| female       | 0.1924<br>(0.1344)                   |                         |
| smoker       | -0.2148<br>(0.1544)                  |                         |
| married      | -0.1382<br>(0.1454)                  |                         |
| black        | 0.3820<br>(0.2336)                   |                         |
| amind        | -0.2063<br>(0.5460)                  |                         |
| asian        | 0.4460**<br>(0.2084)                 |                         |
| othrace      | 0.0000<br>(.)                        |                         |
| midwest      | -0.1453<br>(0.2083)                  |                         |
| south        | 0.0168<br>(0.1860)                   |                         |
| west         | -0.4789**<br>(0.2179)                |                         |
| lesshischool | -0.1243<br>(0.1896)                  |                         |
| collegeplus  | 0.0374<br>(0.1523)                   |                         |
| poor         | 0.5590**<br>(0.2291)                 |                         |
| nearpoor     | 0.6020**<br>(0.2986)                 |                         |
| middleinc    | -0.0838<br>(0.2252)                  |                         |
| highinc      | -0.1426<br>(0.2374)                  |                         |

|              |              |              |
|--------------|--------------|--------------|
| _bs_1        |              | 2.4709e+09   |
|              |              | (3.0308e+09) |
| _bs_2        |              | 0.0736       |
|              |              | (0.0901)     |
| _cons        | -3.0469***   |              |
|              | (0.3616)     |              |
| <hr/>        |              |              |
| glm          |              |              |
| overweight   | 2870.3255    |              |
|              | (3208.5088)  |              |
| obese        | 993.2829     |              |
|              | (3055.4536)  |              |
| unins        | -3914.4257   |              |
|              | (3798.5550)  |              |
| medicaid     | 1795.7142    |              |
|              | (3810.8131)  |              |
| medicare     | -538.8949    |              |
|              | (4037.0150)  |              |
| female       | -841.3098    |              |
|              | (2625.5151)  |              |
| smoker       | -2677.4154   |              |
|              | (2932.8308)  |              |
| married      | -43.5838     |              |
|              | (2866.9823)  |              |
| black        | -1225.1217   |              |
|              | (4370.3699)  |              |
| amind        | -8684.1771   |              |
|              | (10857.1021) |              |
| asian        | -1524.9920   |              |
|              | (3828.9969)  |              |
| othrace      | 0.0000       |              |
|              | (.)          |              |
| midwest      | 274.5786     |              |
|              | (3965.2617)  |              |
| south        | -376.4266    |              |
|              | (3617.6786)  |              |
| west         | 7250.5575*   |              |
|              | (4223.5758)  |              |
| lesshischool | -76.3569     |              |
|              | (3643.8596)  |              |
| collegeplus  | -824.5754    |              |
|              | (2870.5802)  |              |
| poor         | 281.2429     |              |
|              | (4325.3223)  |              |
| nearpoor     | -2765.0684   |              |
|              | (5631.6894)  |              |
| middleinc    | 1993.0306    |              |

|             |              |           |
|-------------|--------------|-----------|
|             | (4329.2142)  |           |
| highinc     | -1677.7935   |           |
|             | (4386.6672)  |           |
| _cons       | 15074.9540** |           |
|             | (6859.9428)  |           |
| <hr/>       |              |           |
| No. of Obs. | 3914.0000    | 3914.0000 |
| R-Squared   |              |           |
| <hr/>       |              |           |

|              | (1)<br>inpatient<br>Coef./std.errors | (2)<br>Coef./std.errors |
|--------------|--------------------------------------|-------------------------|
| main         |                                      |                         |
| overweight   | 0.1241<br>(0.1801)                   |                         |
| obese        | 0.3655**<br>(0.1735)                 |                         |
| unins        | -0.2826<br>(0.2142)                  |                         |
| medicaid     | 0.6721***<br>(0.2227)                |                         |
| medicare     | 0.7763***<br>(0.1870)                |                         |
| female       | -0.1186<br>(0.1371)                  |                         |
| smoker       | 0.0241<br>(0.1647)                   |                         |
| married      | -0.1346<br>(0.1469)                  |                         |
| black        | 0.1245<br>(0.2486)                   |                         |
| amind        | -0.4749<br>(0.5032)                  |                         |
| asian        | 0.1625<br>(0.2143)                   |                         |
| othrace      | 0.0000<br>(.)                        |                         |
| midwest      | 0.0028<br>(0.2192)                   |                         |
| south        | 0.1833<br>(0.1922)                   |                         |
| west         | -0.2047<br>(0.2270)                  |                         |
| lesshischool | 0.0865<br>(0.1840)                   |                         |
| collegeplus  | -0.1179<br>(0.1601)                  |                         |
| poor         | 0.0902<br>(0.2531)                   |                         |
| nearpoor     | 0.4640<br>(0.3033)                   |                         |
| middleinc    | 0.3682<br>(0.2299)                   |                         |
| highinc      | -0.1275<br>(0.2479)                  |                         |

|              |              |              |
|--------------|--------------|--------------|
| _bs_1        |              | 5.6571e+09*  |
|              |              | (3.3125e+09) |
| _bs_2        |              | 0.1411*      |
|              |              | (0.0810)     |
| _cons        | -2.7020***   |              |
|              | (0.3806)     |              |
| glm          |              |              |
| overweight   | 2619.2003    |              |
|              | (2936.2388)  |              |
| obese        | 1357.3099    |              |
|              | (2763.5348)  |              |
| unins        | -5082.3697   |              |
|              | (3491.8059)  |              |
| medicaid     | -3993.9362   |              |
|              | (3417.4359)  |              |
| medicare     | -183.8857    |              |
|              | (2711.2971)  |              |
| female       | -1284.7015   |              |
|              | (2106.8592)  |              |
| smoker       | -6051.2516** |              |
|              | (2512.3005)  |              |
| married      | -479.4268    |              |
|              | (2326.2148)  |              |
| black        | 8039.8451**  |              |
|              | (3773.4046)  |              |
| amind        | 4117.3958    |              |
|              | (8146.7286)  |              |
| asian        | 2552.5057    |              |
|              | (3177.5700)  |              |
| othrace      | 0.0000       |              |
|              | (.)          |              |
| midwest      | 3929.6259    |              |
|              | (3371.0944)  |              |
| south        | 2836.6296    |              |
|              | (2946.1071)  |              |
| west         | 3153.7192    |              |
|              | (3667.5371)  |              |
| lesshischool | -1382.7343   |              |
|              | (2818.5224)  |              |
| collegeplus  | -3640.5991   |              |
|              | (2495.7235)  |              |
| poor         | 1055.3340    |              |
|              | (4019.2957)  |              |
| nearpoor     | 1292.4826    |              |
|              | (4635.9004)  |              |
| middleinc    | 4057.3621    |              |

|             |             |           |
|-------------|-------------|-----------|
|             | (3621.8738) |           |
| highinc     | 7746.9803*  |           |
|             | (3985.8809) |           |
| _cons       | 9762.1985*  |           |
|             | (5933.0252) |           |
| <hr/>       |             |           |
| No. of Obs. | 2892.0000   | 2892.0000 |
| R-Squared   |             |           |
| <hr/>       |             |           |

|              | (1)<br>inpatient<br>Coef./std.errors | (2)<br>Coef./std.errors     |
|--------------|--------------------------------------|-----------------------------|
| main         |                                      |                             |
| overweight   | -0.0711<br>(0.1716)                  |                             |
| obese        | 0.0809<br>(0.1747)                   |                             |
| female       | -0.0868<br>(0.1428)                  |                             |
| smoker       | -0.2034<br>(0.2009)                  |                             |
| married      | -0.0122<br>(0.1502)                  |                             |
| black        | 0.3667<br>(0.2534)                   |                             |
| amind        | -0.3776<br>(0.4806)                  |                             |
| asian        | 0.1004<br>(0.2270)                   |                             |
| othrace      | 0.0000<br>(.)                        |                             |
| midwest      | 0.3876*<br>(0.2355)                  |                             |
| south        | 0.2470<br>(0.2182)                   |                             |
| west         | 0.2135<br>(0.2444)                   |                             |
| lesshischool | 0.0290<br>(0.1834)                   |                             |
| collegeplus  | -0.0851<br>(0.1712)                  |                             |
| poor         | -0.0937<br>(0.2244)                  |                             |
| nearpoor     | 0.1205<br>(0.2634)                   |                             |
| middleinc    | -0.5537**<br>(0.2171)                |                             |
| highinc      | -0.3190<br>(0.2135)                  |                             |
| _bs_1        |                                      | -2.7140e+08<br>(5.0935e+09) |
| _bs_2        |                                      | -0.0066<br>(0.1216)         |
| _cons        | -1.7889***<br>(0.3705)               |                             |

---

|              |                               |           |
|--------------|-------------------------------|-----------|
| glm          |                               |           |
| overweight   | -4931.2107<br>(5580.9473)     |           |
| obese        | -1521.8501<br>(5575.1511)     |           |
| female       | 924.7976<br>(4713.9338)       |           |
| smoker       | 4345.5213<br>(6298.9492)      |           |
| married      | 6614.0745<br>(5100.0005)      |           |
| black        | -6264.4894<br>(7801.1400)     |           |
| amind        | 83799.2586***<br>(15905.1242) |           |
| asian        | -7852.0482<br>(7001.8570)     |           |
| othrace      | 0.0000<br>(.)                 |           |
| midwest      | -5552.7305<br>(7522.2236)     |           |
| south        | -9512.4198<br>(7051.7990)     |           |
| west         | -4814.7757<br>(8106.8257)     |           |
| lesshischool | -5091.9424<br>(5705.4504)     |           |
| collegeplus  | -2801.7920<br>(5665.9909)     |           |
| poor         | 13108.7461*<br>(7017.8303)    |           |
| nearpoor     | 1972.5231<br>(8211.1285)      |           |
| middleinc    | -694.3279<br>(6971.1117)      |           |
| highinc      | 7079.5527<br>(6866.5864)      |           |
| _cons        | 24387.1751**<br>(11989.2917)  |           |
| No. of Obs.  | 1788.0000                     | 1788.0000 |
| R-Squared    |                               |           |

---



|              | (1)<br>inpatient<br>Coef./std.errors | (2)<br>Coef./std.errors     |
|--------------|--------------------------------------|-----------------------------|
| main         |                                      |                             |
| overweight   | -0.1800<br>(0.1471)                  |                             |
| obese        | 0.0851<br>(0.1744)                   |                             |
| female       | 0.1511<br>(0.1459)                   |                             |
| smoker       | 0.2375<br>(0.2430)                   |                             |
| married      | -0.3275**<br>(0.1488)                |                             |
| black        | 0.1684<br>(0.2729)                   |                             |
| amind        | -0.0440<br>(0.4946)                  |                             |
| asian        | 0.4063*<br>(0.2308)                  |                             |
| othrace      | 0.0000<br>(.)                        |                             |
| midwest      | 0.0650<br>(0.2063)                   |                             |
| south        | 0.1648<br>(0.1847)                   |                             |
| west         | -0.3175<br>(0.2239)                  |                             |
| lesshischool | 0.2553<br>(0.1635)                   |                             |
| collegeplus  | -0.0958<br>(0.1743)                  |                             |
| poor         | 0.1448<br>(0.2038)                   |                             |
| nearpoor     | 0.0239<br>(0.2376)                   |                             |
| middleinc    | -0.2588<br>(0.1944)                  |                             |
| highinc      | 0.3273<br>(0.2016)                   |                             |
| _bs_1        |                                      | -3.2617e+09<br>(2.6134e+09) |
| _bs_2        |                                      | -0.0638<br>(0.0487)         |
| _cons        | -1.7877***<br>(0.3531)               |                             |

---

|              |               |           |
|--------------|---------------|-----------|
| glm          |               |           |
| overweight   | -6349.9075*   |           |
|              | (3497.7324)   |           |
| obese        | -6636.9903    |           |
|              | (4059.4558)   |           |
| female       | -4220.1490    |           |
|              | (3602.1244)   |           |
| smoker       | -1869.9759    |           |
|              | (5691.8250)   |           |
| married      | 181.6556      |           |
|              | (3639.2688)   |           |
| black        | -8107.1800    |           |
|              | (6709.0367)   |           |
| amind        | -475.7672     |           |
|              | (12459.2629)  |           |
| asian        | -7005.8709    |           |
|              | (5775.6105)   |           |
| othrace      | 0.0000        |           |
|              | (.)           |           |
| midwest      | -6929.3034    |           |
|              | (4875.9886)   |           |
| south        | 1040.6784     |           |
|              | (4363.4869)   |           |
| west         | -8683.7301    |           |
|              | (5644.2521)   |           |
| lesshischool | -104.5715     |           |
|              | (3944.6007)   |           |
| collegeplus  | -4726.3208    |           |
|              | (4239.8491)   |           |
| poor         | -1170.3682    |           |
|              | (4829.6649)   |           |
| nearpoor     | 177.3089      |           |
|              | (5588.1297)   |           |
| middleinc    | 3726.0471     |           |
|              | (4670.0978)   |           |
| highinc      | 6770.6868     |           |
|              | (4736.7131)   |           |
| _cons        | 30602.7438*** |           |
|              | (8971.9963)   |           |
| No. of Obs.  | 1569.0000     | 1569.0000 |
| R-Squared    |               |           |

---

|              | (1)<br>inpatient<br>Coef./std.errors | (2)<br>Coef./std.errors |
|--------------|--------------------------------------|-------------------------|
| main         |                                      |                         |
| overweight   | 0.0397<br>(0.0691)                   |                         |
| obese        | 0.3142***<br>(0.0689)                |                         |
| age3544      | -0.4009***<br>(0.0985)               |                         |
| age4554      | -0.1961**<br>(0.0935)                |                         |
| age5564      | 0.1120<br>(0.0934)                   |                         |
| age6574      | 0.4727***<br>(0.0916)                |                         |
| age75plus    | 0.8456***<br>(0.0902)                |                         |
| female       | 0.4513***<br>(0.0594)                |                         |
| smoker       | 0.0332<br>(0.0750)                   |                         |
| married      | 0.0774<br>(0.0605)                   |                         |
| black        | 0.1399<br>(0.0992)                   |                         |
| amind        | -0.0391<br>(0.1736)                  |                         |
| asian        | 0.0814<br>(0.0859)                   |                         |
| othrace      | 0.0000<br>(.)                        |                         |
| midwest      | 0.1499*<br>(0.0906)                  |                         |
| south        | 0.1026<br>(0.0833)                   |                         |
| west         | -0.0940<br>(0.0937)                  |                         |
| lesshischool | 0.0792<br>(0.0754)                   |                         |
| collegeplus  | -0.0198<br>(0.0682)                  |                         |
| poor         | 0.4048***<br>(0.0925)                |                         |
| nearpoor     | 0.1713<br>(0.1219)                   |                         |

|              |                             |                              |
|--------------|-----------------------------|------------------------------|
| middleinc    | -0.2740***<br>(0.0886)      |                              |
| highinc      | -0.3763***<br>(0.0923)      |                              |
| _bs_1        |                             | 1.5937e+10**<br>(6.8003e+09) |
| _bs_2        |                             | 0.0747**<br>(0.0323)         |
| _cons        | -2.7393***<br>(0.1490)      |                              |
| <hr/>        |                             |                              |
| glm          |                             |                              |
| overweight   | -1342.0693<br>(1496.3188)   |                              |
| obese        | -212.9111<br>(1486.0076)    |                              |
| age3544      | 4193.2001*<br>(2205.2329)   |                              |
| age4554      | 5325.9214**<br>(2075.1361)  |                              |
| age5564      | 6304.3689***<br>(2082.1172) |                              |
| age6574      | 8513.0130***<br>(2018.8146) |                              |
| age75plus    | 7373.2446***<br>(1982.3560) |                              |
| female       | -2739.4518**<br>(1341.6161) |                              |
| smoker       | -708.7571<br>(1643.0946)    |                              |
| married      | 695.0102<br>(1350.7043)     |                              |
| black        | -715.2612<br>(2156.0719)    |                              |
| amind        | 8071.3503**<br>(3825.0258)  |                              |
| asian        | -1596.0002<br>(1855.0132)   |                              |
| othrace      | 0.0000<br>(.)               |                              |
| midwest      | -674.3758<br>(1964.5481)    |                              |
| south        | -647.9895<br>(1797.8004)    |                              |
| west         | 1369.2276<br>(2062.5835)    |                              |
| lesshischool | 66.2178                     |                              |

|             |               |            |
|-------------|---------------|------------|
|             | (1588.2566)   |            |
| collegeplus | -1940.8780    |            |
|             | (1500.4080)   |            |
| poor        | 2236.8637     |            |
|             | (1981.7048)   |            |
| nearpoor    | 2215.4622     |            |
|             | (2587.5626)   |            |
| middleinc   | 2487.2337     |            |
|             | (1932.3329)   |            |
| highinc     | 5338.4772***  |            |
|             | (1995.3104)   |            |
| _cons       | 10491.4097*** |            |
|             | (3340.8441)   |            |
| <hr/>       |               |            |
| No. of Obs. | 15175.0000    | 15175.0000 |
| R-Squared   |               |            |
| <hr/>       |               |            |

|              | (1)<br>inpatient<br>Coef./std.errors | (2)<br>Coef./std.errors |
|--------------|--------------------------------------|-------------------------|
| main         |                                      |                         |
| overweight   | 0.0943<br>(0.0925)                   |                         |
| obese        | 0.3932***<br>(0.0938)                |                         |
| age3544      | -0.3582***<br>(0.1230)               |                         |
| age4554      | -0.2599**<br>(0.1204)                |                         |
| age5564      | -0.0006<br>(0.1219)                  |                         |
| age6574      | 0.6441***<br>(0.1349)                |                         |
| age75plus    | 1.2545***<br>(0.1299)                |                         |
| female       | 0.5754***<br>(0.0785)                |                         |
| smoker       | -0.0926<br>(0.1112)                  |                         |
| married      | 0.3526***<br>(0.0838)                |                         |
| black        | 0.1383<br>(0.1581)                   |                         |
| amind        | 0.2996<br>(0.2143)                   |                         |
| asian        | 0.1993<br>(0.1314)                   |                         |
| othrace      | 0.0000<br>(.)                        |                         |
| midwest      | 0.1403<br>(0.1180)                   |                         |
| south        | 0.1584<br>(0.1120)                   |                         |
| west         | -0.0178<br>(0.1262)                  |                         |
| lesshischool | -0.0878<br>(0.1210)                  |                         |
| collegeplus  | -0.0194<br>(0.0856)                  |                         |
| poor         | 0.2202<br>(0.1773)                   |                         |
| nearpoor     | 0.1092<br>(0.2132)                   |                         |

|              |                              |                               |
|--------------|------------------------------|-------------------------------|
| middleinc    | -0.1390<br>(0.1222)          |                               |
| highinc      | -0.2610**<br>(0.1238)        |                               |
| _bs_1        |                              | 1.5000e+10***<br>(5.1571e+09) |
| _bs_2        |                              | 0.1056***<br>(0.0368)         |
| _cons        | -3.3757***<br>(0.2147)       |                               |
| <hr/>        |                              |                               |
| glm          |                              |                               |
| overweight   | -48.3398<br>(2145.4784)      |                               |
| obese        | 657.2754<br>(2140.8243)      |                               |
| age3544      | 2675.9633<br>(2878.5112)     |                               |
| age4554      | 4726.5321*<br>(2813.9610)    |                               |
| age5564      | 8963.2408***<br>(2888.3463)  |                               |
| age6574      | 10224.2000***<br>(3131.4725) |                               |
| age75plus    | 5827.9200*<br>(2992.9497)    |                               |
| female       | -1015.0766<br>(1889.3501)    |                               |
| smoker       | -1418.5133<br>(2585.9541)    |                               |
| married      | 350.0539<br>(1900.0883)      |                               |
| black        | 4287.5829<br>(3703.1181)     |                               |
| amind        | 15374.1700***<br>(4946.9518) |                               |
| asian        | 2061.9883<br>(3048.7988)     |                               |
| othrace      | 0.0000<br>(.)                |                               |
| midwest      | 192.0746<br>(2697.1409)      |                               |
| south        | -1174.1773<br>(2562.0536)    |                               |
| west         | 2143.7050<br>(2921.5027)     |                               |
| lesshischool | 1500.3561                    |                               |

|             |             |            |
|-------------|-------------|------------|
|             | (2724.5845) |            |
| collegeplus | -1959.8475  |            |
|             | (1996.6042) |            |
| poor        | -887.3945   |            |
|             | (4015.6845) |            |
| nearpoor    | 1810.8728   |            |
|             | (4785.6879) |            |
| middleinc   | 1453.1394   |            |
|             | (2799.4525) |            |
| highinc     | 2541.7664   |            |
|             | (2836.7083) |            |
| _cons       | 7130.5411   |            |
|             | (5009.9071) |            |
| <hr/>       |             |            |
| No. of Obs. | 11061.0000  | 11061.0000 |
| R-Squared   |             |            |
| <hr/>       |             |            |



|              | (1)<br>inpatient<br>Coef./std.errors | (2)<br>Coef./std.errors |
|--------------|--------------------------------------|-------------------------|
| main         |                                      |                         |
| overweight   | 0.0873<br>(0.1434)                   |                         |
| obese        | 0.1598<br>(0.1353)                   |                         |
| age3544      | -0.5461***<br>(0.1857)               |                         |
| age4554      | -0.0059<br>(0.1682)                  |                         |
| age5564      | 0.1613<br>(0.1874)                   |                         |
| age6574      | 0.1376<br>(0.1900)                   |                         |
| age75plus    | 0.2430<br>(0.1912)                   |                         |
| female       | 0.2618**<br>(0.1308)                 |                         |
| smoker       | -0.1031<br>(0.1318)                  |                         |
| married      | -0.1051<br>(0.1326)                  |                         |
| black        | -0.0237<br>(0.1640)                  |                         |
| amind        | -0.4615<br>(0.4218)                  |                         |
| asian        | 0.1297<br>(0.1511)                   |                         |
| othrace      | 0.0000<br>(.)                        |                         |
| midwest      | 0.4951**<br>(0.1924)                 |                         |
| south        | 0.2635<br>(0.1754)                   |                         |
| west         | -0.0433<br>(0.1807)                  |                         |
| lesshischool | 0.0674<br>(0.1351)                   |                         |
| collegeplus  | 0.2442<br>(0.1663)                   |                         |
| poor         | 0.3774**<br>(0.1628)                 |                         |
| nearpoor     | 0.2626<br>(0.2085)                   |                         |

|              |                              |                            |
|--------------|------------------------------|----------------------------|
| middleinc    | 0.1884<br>(0.2094)           |                            |
| highinc      | -0.3124<br>(0.4367)          |                            |
| _bs_1        |                              | 3.8611e+09<br>(2.4997e+09) |
| _bs_2        |                              | 0.1415<br>(0.0897)         |
| _cons        | -2.2210***<br>(0.2747)       |                            |
| <hr/>        |                              |                            |
| glm          |                              |                            |
| overweight   | 1307.7783<br>(2556.1437)     |                            |
| obese        | 2937.5579<br>(2427.0935)     |                            |
| age3544      | 6985.5575*<br>(3570.5747)    |                            |
| age4554      | 8664.9291***<br>(3072.2427)  |                            |
| age5564      | 1232.1119<br>(3452.3596)     |                            |
| age6574      | 11450.7178***<br>(3497.5120) |                            |
| age75plus    | 3586.6364<br>(3400.0125)     |                            |
| female       | -4900.8808*<br>(2519.0764)   |                            |
| smoker       | 854.9366<br>(2428.2256)      |                            |
| married      | 540.5378<br>(2495.1814)      |                            |
| black        | -1160.3977<br>(3053.2930)    |                            |
| amind        | -7770.4080<br>(8055.4130)    |                            |
| asian        | -2799.0542<br>(2724.9466)    |                            |
| othrace      | 0.0000<br>(.)                |                            |
| midwest      | -441.1397<br>(3479.7089)     |                            |
| south        | -3664.7780<br>(3226.2130)    |                            |
| west         | 3632.1731<br>(3295.3814)     |                            |
| lesshischool | 741.4958                     |                            |

|             |             |           |
|-------------|-------------|-----------|
|             | (2446.4171) |           |
| collegeplus | -1178.5213  |           |
|             | (3023.7249) |           |
| poor        | 5172.6391*  |           |
|             | (3020.8129) |           |
| nearpoor    | 4678.2682   |           |
|             | (3773.2541) |           |
| middleinc   | 2261.5808   |           |
|             | (3830.3614) |           |
| highinc     | 6476.1714   |           |
|             | (8178.0893) |           |
| _cons       | 7571.9173   |           |
|             | (5069.9334) |           |
| <hr/>       |             |           |
| No. of Obs. | 2245.0000   | 2245.0000 |
| R-Squared   |             |           |
| <hr/>       |             |           |

|              | (1)<br>inpatient<br>Coef./std.errors | (2)<br>Coef./std.errors |
|--------------|--------------------------------------|-------------------------|
| main         |                                      |                         |
| overweight   | -0.0778<br>(0.1045)                  |                         |
| obese        | 0.1786<br>(0.1091)                   |                         |
| age3544      | 0.2162<br>(0.4525)                   |                         |
| age4554      | 0.0135<br>(0.4160)                   |                         |
| age5564      | 0.2490<br>(0.4019)                   |                         |
| age6574      | -0.1664<br>(0.3826)                  |                         |
| age75plus    | 0.1857<br>(0.3822)                   |                         |
| female       | 0.0820<br>(0.0913)                   |                         |
| smoker       | -0.0188<br>(0.1264)                  |                         |
| married      | -0.1468<br>(0.0951)                  |                         |
| black        | 0.0630<br>(0.1639)                   |                         |
| amind        | -0.5121<br>(0.3366)                  |                         |
| asian        | 0.0076<br>(0.1427)                   |                         |
| othrace      | 0.0000<br>(.)                        |                         |
| midwest      | 0.1575<br>(0.1399)                   |                         |
| south        | 0.0880<br>(0.1264)                   |                         |
| west         | -0.1059<br>(0.1492)                  |                         |
| lesshischool | 0.0272<br>(0.1090)                   |                         |
| collegeplus  | -0.0994<br>(0.1085)                  |                         |
| poor         | 0.0825<br>(0.1337)                   |                         |
| nearpoor     | 0.2189<br>(0.1589)                   |                         |

|              |               |              |
|--------------|---------------|--------------|
| middleinc    | -0.2334*      |              |
|              | (0.1325)      |              |
| highinc      | 0.0741        |              |
|              | (0.1375)      |              |
| _bs_1        |               | -3.4107e+09  |
|              |               | (6.2167e+09) |
| _bs_2        |               | -0.0313      |
|              |               | (0.0557)     |
| _cons        | -1.5968***    |              |
|              | (0.4267)      |              |
| <hr/>        |               |              |
| glm          |               |              |
| overweight   | -5907.6720**  |              |
|              | (2745.2663)   |              |
| obese        | -4422.5103    |              |
|              | (2889.1435)   |              |
| age3544      | 6918.3370     |              |
|              | (11686.4263)  |              |
| age4554      | -2807.1766    |              |
|              | (10846.5192)  |              |
| age5564      | -1647.1339    |              |
|              | (10449.7767)  |              |
| age6574      | -463.9785     |              |
|              | (10003.8583)  |              |
| age75plus    | -1450.6572    |              |
|              | (10067.6837)  |              |
| female       | -2126.5168    |              |
|              | (2467.3036)   |              |
| smoker       | 157.8656      |              |
|              | (3298.5305)   |              |
| married      | 3503.6610     |              |
|              | (2632.2122)   |              |
| black        | -4369.6474    |              |
|              | (4297.7534)   |              |
| amind        | 42099.7292*** |              |
|              | (9239.1008)   |              |
| asian        | -4710.1593    |              |
|              | (3756.2672)   |              |
| othrace      | 0.0000        |              |
|              | (.)           |              |
| midwest      | -4349.2425    |              |
|              | (3643.1770)   |              |
| south        | -693.5824     |              |
|              | (3289.4661)   |              |
| west         | -1769.0440    |              |
|              | (4064.7493)   |              |
| lesshischool | -1763.4468    |              |

|             |              |           |
|-------------|--------------|-----------|
|             | (2857.8510)  |           |
| collegeplus | -4289.6647   |           |
|             | (2884.7446)  |           |
| poor        | 3059.2476    |           |
|             | (3499.8449)  |           |
| nearpoor    | 1559.6471    |           |
|             | (4096.6794)  |           |
| middleinc   | 1656.5610    |           |
|             | (3517.3535)  |           |
| highinc     | 7712.8767**  |           |
|             | (3578.8089)  |           |
| _cons       | 24796.7558** |           |
|             | (11601.8260) |           |
| <hr/>       |              |           |
| No. of Obs. | 3861.0000    | 3861.0000 |
| R-Squared   |              |           |
| <hr/>       |              |           |

|              | (1)<br>inpatient<br>Coef./std.errors | (2)<br>Coef./std.errors |
|--------------|--------------------------------------|-------------------------|
| main         |                                      |                         |
| overweight   | 0.3188**<br>(0.1274)                 |                         |
| obese        | 0.3504***<br>(0.1290)                |                         |
| unins        | -0.4889***<br>(0.1501)               |                         |
| medicaid     | 0.6736***<br>(0.1591)                |                         |
| medicare     | 0.7689*<br>(0.4022)                  |                         |
| female       | 1.7721***<br>(0.1527)                |                         |
| smoker       | -0.1062<br>(0.1398)                  |                         |
| married      | 0.6839***<br>(0.1102)                |                         |
| black        | -0.1335<br>(0.1670)                  |                         |
| amind        | 0.1889<br>(0.3108)                   |                         |
| asian        | 0.0560<br>(0.1408)                   |                         |
| othrace      | 0.0000<br>(.)                        |                         |
| midwest      | 0.1316<br>(0.1928)                   |                         |
| south        | 0.1987<br>(0.1753)                   |                         |
| west         | -0.1588<br>(0.1868)                  |                         |
| lesshischool | -0.1058<br>(0.1345)                  |                         |
| collegeplus  | -0.0341<br>(0.1338)                  |                         |
| poor         | 0.5598***<br>(0.1603)                |                         |
| nearpoor     | 0.0143<br>(0.2299)                   |                         |
| middleinc    | -0.1078<br>(0.1687)                  |                         |
| highinc      | -0.3854*<br>(0.1997)                 |                         |

|              |               |              |
|--------------|---------------|--------------|
| _bs_1        |               | 3.3369e+09** |
|              |               | (1.5666e+09) |
| _bs_2        |               | 0.0993**     |
|              |               | (0.0436)     |
| _cons        | -4.3375***    |              |
|              | (0.2869)      |              |
| <hr/>        |               |              |
| glm          |               |              |
| overweight   | 852.8192      |              |
|              | (1269.4494)   |              |
| obese        | 877.0597      |              |
|              | (1272.4061)   |              |
| unins        | -3793.8168**  |              |
|              | (1608.6482)   |              |
| medicaid     | -1825.1314    |              |
|              | (1545.4380)   |              |
| medicare     | 7227.2773**   |              |
|              | (3663.3823)   |              |
| female       | -5159.5896*** |              |
|              | (1658.6007)   |              |
| smoker       | 70.3581       |              |
|              | (1487.6374)   |              |
| married      | 434.1625      |              |
|              | (1198.9775)   |              |
| black        | 3143.6703*    |              |
|              | (1671.1615)   |              |
| amind        | -1114.6730    |              |
|              | (3208.3186)   |              |
| asian        | 1187.6286     |              |
|              | (1461.1929)   |              |
| othrace      | 0.0000        |              |
|              | (.)           |              |
| midwest      | -1634.2903    |              |
|              | (1939.3854)   |              |
| south        | -1551.9261    |              |
|              | (1782.3810)   |              |
| west         | 33.6626       |              |
|              | (1869.5516)   |              |
| lesshischool | 2083.3418     |              |
|              | (1329.2047)   |              |
| collegeplus  | -1174.9257    |              |
|              | (1336.6689)   |              |
| poor         | -80.9104      |              |
|              | (1624.0386)   |              |
| nearpoor     | 5930.7125**   |              |
|              | (2334.2632)   |              |
| middleinc    | 2261.3042     |              |



|             |               |           |
|-------------|---------------|-----------|
|             | (1715.7756)   |           |
| highinc     | 4550.3952**   |           |
|             | (2008.2560)   |           |
| _cons       | 11407.3418*** |           |
|             | (2746.0026)   |           |
| <hr/>       |               |           |
| No. of Obs. | 5848.0000     | 5848.0000 |
| R-Squared   |               |           |
| <hr/>       |               |           |

|              | (1)<br>inpatient<br>Coef./std.errors | (2)<br>Coef./std.errors |
|--------------|--------------------------------------|-------------------------|
| main         |                                      |                         |
| overweight   | 0.2002<br>(0.1989)                   |                         |
| obese        | 0.8319***<br>(0.1812)                |                         |
| unins        | -0.2825<br>(0.2083)                  |                         |
| medicaid     | 0.4012*<br>(0.2369)                  |                         |
| medicare     | 1.2547***<br>(0.2935)                |                         |
| female       | 0.7683***<br>(0.1601)                |                         |
| smoker       | 0.1365<br>(0.1778)                   |                         |
| married      | 0.0640<br>(0.1637)                   |                         |
| black        | 0.2621<br>(0.2566)                   |                         |
| amind        | 0.7167**<br>(0.3598)                 |                         |
| asian        | 0.3627*<br>(0.2166)                  |                         |
| othrace      | 0.0000<br>(.)                        |                         |
| midwest      | 0.3720<br>(0.2382)                   |                         |
| south        | -0.0164<br>(0.2315)                  |                         |
| west         | -0.0246<br>(0.2470)                  |                         |
| lesshischool | 0.2243<br>(0.2159)                   |                         |
| collegeplus  | 0.1927<br>(0.1801)                   |                         |
| poor         | -0.0163<br>(0.2415)                  |                         |
| nearpoor     | -0.0635<br>(0.3307)                  |                         |
| middleinc    | -0.3384<br>(0.2250)                  |                         |
| highinc      | -0.2843<br>(0.2444)                  |                         |

|              |              |              |
|--------------|--------------|--------------|
| _bs_1        |              | 1.8845e+09   |
|              |              | (2.0608e+09) |
| _bs_2        |              | 0.0766       |
|              |              | (0.0842)     |
| _cons        | -4.1216***   |              |
|              | (0.4102)     |              |
| <hr/>        |              |              |
| glm          |              |              |
| overweight   | 1684.0910    |              |
|              | (3313.8903)  |              |
| obese        | 2990.0399    |              |
|              | (3166.1976)  |              |
| unins        | -5774.5219   |              |
|              | (3603.5567)  |              |
| medicaid     | 345.1821     |              |
|              | (4074.6451)  |              |
| medicare     | 10725.3856** |              |
|              | (4360.7032)  |              |
| female       | -5691.2832** |              |
|              | (2586.6656)  |              |
| smoker       | 7140.4047**  |              |
|              | (3021.4195)  |              |
| married      | 6888.2930**  |              |
|              | (2965.8311)  |              |
| black        | -563.5131    |              |
|              | (4273.1068)  |              |
| amind        | -5033.7443   |              |
|              | (5901.5116)  |              |
| asian        | -4264.2046   |              |
|              | (3587.4922)  |              |
| othrace      | 0.0000       |              |
|              | (.)          |              |
| midwest      | 6827.7689*   |              |
|              | (3902.8600)  |              |
| south        | 3035.7154    |              |
|              | (3745.6863)  |              |
| west         | 8826.7765**  |              |
|              | (3956.9235)  |              |
| lesshischool | 2100.3848    |              |
|              | (3537.4515)  |              |
| collegeplus  | 4238.9668    |              |
|              | (3172.2222)  |              |
| poor         | 1949.2996    |              |
|              | (3907.1575)  |              |
| nearpoor     | 6290.9965    |              |
|              | (5249.4572)  |              |
| middleinc    | 751.9616     |              |

|             |             |           |
|-------------|-------------|-----------|
|             | (3671.3290) |           |
| highinc     | 2136.2558   |           |
|             | (3909.2107) |           |
| _cons       | 2195.4252   |           |
|             | (6424.2101) |           |
| <hr/>       |             |           |
| No. of Obs. | 3885.0000   | 3885.0000 |
| R-Squared   |             |           |
| <hr/>       |             |           |

|              | (1)<br>inpatient<br>Coef./std.errors | (2)<br>Coef./std.errors |
|--------------|--------------------------------------|-------------------------|
| main         |                                      |                         |
| overweight   | 0.0407<br>(0.1657)                   |                         |
| obese        | 0.1778<br>(0.1600)                   |                         |
| unins        | -0.0659<br>(0.1942)                  |                         |
| medicaid     | 0.8443***<br>(0.2190)                |                         |
| medicare     | 0.5240**<br>(0.2254)                 |                         |
| female       | 0.1924<br>(0.1344)                   |                         |
| smoker       | -0.2148<br>(0.1544)                  |                         |
| married      | -0.1382<br>(0.1454)                  |                         |
| black        | 0.3820<br>(0.2336)                   |                         |
| amind        | -0.2063<br>(0.5460)                  |                         |
| asian        | 0.4460**<br>(0.2084)                 |                         |
| othrace      | 0.0000<br>(.)                        |                         |
| midwest      | -0.1453<br>(0.2083)                  |                         |
| south        | 0.0168<br>(0.1860)                   |                         |
| west         | -0.4789**<br>(0.2179)                |                         |
| lesshischool | -0.1243<br>(0.1896)                  |                         |
| collegeplus  | 0.0374<br>(0.1523)                   |                         |
| poor         | 0.5590**<br>(0.2291)                 |                         |
| nearpoor     | 0.6020**<br>(0.2986)                 |                         |
| middleinc    | -0.0838<br>(0.2252)                  |                         |
| highinc      | -0.1426<br>(0.2374)                  |                         |

|              |              |              |
|--------------|--------------|--------------|
| _bs_1        |              | 2.7462e+09   |
|              |              | (2.8928e+09) |
| _bs_2        |              | 0.0819       |
|              |              | (0.0857)     |
| _cons        | -3.0469***   |              |
|              | (0.3616)     |              |
| glm          |              |              |
| overweight   | 2870.3255    |              |
|              | (3208.5088)  |              |
| obese        | 993.2829     |              |
|              | (3055.4536)  |              |
| unins        | -3914.4257   |              |
|              | (3798.5550)  |              |
| medicaid     | 1795.7142    |              |
|              | (3810.8131)  |              |
| medicare     | -538.8949    |              |
|              | (4037.0150)  |              |
| female       | -841.3098    |              |
|              | (2625.5151)  |              |
| smoker       | -2677.4154   |              |
|              | (2932.8308)  |              |
| married      | -43.5838     |              |
|              | (2866.9823)  |              |
| black        | -1225.1217   |              |
|              | (4370.3699)  |              |
| amind        | -8684.1771   |              |
|              | (10857.1021) |              |
| asian        | -1524.9920   |              |
|              | (3828.9969)  |              |
| othrace      | 0.0000       |              |
|              | (.)          |              |
| midwest      | 274.5786     |              |
|              | (3965.2617)  |              |
| south        | -376.4266    |              |
|              | (3617.6786)  |              |
| west         | 7250.5575*   |              |
|              | (4223.5758)  |              |
| lesshischool | -76.3569     |              |
|              | (3643.8596)  |              |
| collegeplus  | -824.5754    |              |
|              | (2870.5802)  |              |
| poor         | 281.2429     |              |
|              | (4325.3223)  |              |
| nearpoor     | -2765.0684   |              |
|              | (5631.6894)  |              |
| middleinc    | 1993.0306    |              |

|             |              |           |
|-------------|--------------|-----------|
|             | (4329.2142)  |           |
| highinc     | -1677.7935   |           |
|             | (4386.6672)  |           |
| _cons       | 15074.9540** |           |
|             | (6859.9428)  |           |
| <hr/>       |              |           |
| No. of Obs. | 3914.0000    | 3914.0000 |
| R-Squared   |              |           |
| <hr/>       |              |           |

|              | (1)<br>inpatient<br>Coef./std.errors | (2)<br>Coef./std.errors |
|--------------|--------------------------------------|-------------------------|
| main         |                                      |                         |
| overweight   | 0.1241<br>(0.1801)                   |                         |
| obese        | 0.3655**<br>(0.1735)                 |                         |
| unins        | -0.2826<br>(0.2142)                  |                         |
| medicaid     | 0.6721***<br>(0.2227)                |                         |
| medicare     | 0.7763***<br>(0.1870)                |                         |
| female       | -0.1186<br>(0.1371)                  |                         |
| smoker       | 0.0241<br>(0.1647)                   |                         |
| married      | -0.1346<br>(0.1469)                  |                         |
| black        | 0.1245<br>(0.2486)                   |                         |
| amind        | -0.4749<br>(0.5032)                  |                         |
| asian        | 0.1625<br>(0.2143)                   |                         |
| othrace      | 0.0000<br>(.)                        |                         |
| midwest      | 0.0028<br>(0.2192)                   |                         |
| south        | 0.1833<br>(0.1922)                   |                         |
| west         | -0.2047<br>(0.2270)                  |                         |
| lesshischool | 0.0865<br>(0.1840)                   |                         |
| collegeplus  | -0.1179<br>(0.1601)                  |                         |
| poor         | 0.0902<br>(0.2531)                   |                         |
| nearpoor     | 0.4640<br>(0.3033)                   |                         |
| middleinc    | 0.3682<br>(0.2299)                   |                         |
| highinc      | -0.1275<br>(0.2479)                  |                         |



|              |              |              |
|--------------|--------------|--------------|
| _bs_1        |              | 3.5673e+09   |
|              |              | (3.5705e+09) |
| _bs_2        |              | 0.0890       |
|              |              | (0.0869)     |
| _cons        | -2.7020***   |              |
|              | (0.3806)     |              |
| glm          |              |              |
| overweight   | 2619.2003    |              |
|              | (2936.2388)  |              |
| obese        | 1357.3099    |              |
|              | (2763.5348)  |              |
| unins        | -5082.3697   |              |
|              | (3491.8059)  |              |
| medicaid     | -3993.9362   |              |
|              | (3417.4359)  |              |
| medicare     | -183.8857    |              |
|              | (2711.2971)  |              |
| female       | -1284.7015   |              |
|              | (2106.8592)  |              |
| smoker       | -6051.2516** |              |
|              | (2512.3005)  |              |
| married      | -479.4268    |              |
|              | (2326.2148)  |              |
| black        | 8039.8451**  |              |
|              | (3773.4046)  |              |
| amind        | 4117.3958    |              |
|              | (8146.7286)  |              |
| asian        | 2552.5057    |              |
|              | (3177.5700)  |              |
| othrace      | 0.0000       |              |
|              | (.)          |              |
| midwest      | 3929.6259    |              |
|              | (3371.0944)  |              |
| south        | 2836.6296    |              |
|              | (2946.1071)  |              |
| west         | 3153.7192    |              |
|              | (3667.5371)  |              |
| lesshischool | -1382.7343   |              |
|              | (2818.5224)  |              |
| collegeplus  | -3640.5991   |              |
|              | (2495.7235)  |              |
| poor         | 1055.3340    |              |
|              | (4019.2957)  |              |
| nearpoor     | 1292.4826    |              |
|              | (4635.9004)  |              |
| middleinc    | 4057.3621    |              |

|             |             |           |
|-------------|-------------|-----------|
|             | (3621.8738) |           |
| highinc     | 7746.9803*  |           |
|             | (3985.8809) |           |
| _cons       | 9762.1985*  |           |
|             | (5933.0252) |           |
| <hr/>       |             |           |
| No. of Obs. | 2892.0000   | 2892.0000 |
| R-Squared   |             |           |
| <hr/>       |             |           |

|              | (1)<br>inpatient<br>Coef./std.errors | (2)<br>Coef./std.errors     |
|--------------|--------------------------------------|-----------------------------|
| main         |                                      |                             |
| overweight   | -0.0711<br>(0.1716)                  |                             |
| obese        | 0.0809<br>(0.1747)                   |                             |
| female       | -0.0868<br>(0.1428)                  |                             |
| smoker       | -0.2034<br>(0.2009)                  |                             |
| married      | -0.0122<br>(0.1502)                  |                             |
| black        | 0.3667<br>(0.2534)                   |                             |
| amind        | -0.3776<br>(0.4806)                  |                             |
| asian        | 0.1004<br>(0.2270)                   |                             |
| othrace      | 0.0000<br>(.)                        |                             |
| midwest      | 0.3876*<br>(0.2355)                  |                             |
| south        | 0.2470<br>(0.2182)                   |                             |
| west         | 0.2135<br>(0.2444)                   |                             |
| lesshischool | 0.0290<br>(0.1834)                   |                             |
| collegeplus  | -0.0851<br>(0.1712)                  |                             |
| poor         | -0.0937<br>(0.2244)                  |                             |
| nearpoor     | 0.1205<br>(0.2634)                   |                             |
| middleinc    | -0.5537**<br>(0.2171)                |                             |
| highinc      | -0.3190<br>(0.2135)                  |                             |
| _bs_1        |                                      | -5.1938e+09<br>(4.9133e+09) |
| _bs_2        |                                      | -0.1259<br>(0.1107)         |
| _cons        | -1.7889***<br>(0.3705)               |                             |

---

|              |                               |           |
|--------------|-------------------------------|-----------|
| glm          |                               |           |
| overweight   | -4931.2107<br>(5580.9473)     |           |
| obese        | -1521.8501<br>(5575.1511)     |           |
| female       | 924.7976<br>(4713.9338)       |           |
| smoker       | 4345.5213<br>(6298.9492)      |           |
| married      | 6614.0745<br>(5100.0005)      |           |
| black        | -6264.4894<br>(7801.1400)     |           |
| amind        | 83799.2586***<br>(15905.1242) |           |
| asian        | -7852.0482<br>(7001.8570)     |           |
| othrace      | 0.0000<br>(.)                 |           |
| midwest      | -5552.7305<br>(7522.2236)     |           |
| south        | -9512.4198<br>(7051.7990)     |           |
| west         | -4814.7757<br>(8106.8257)     |           |
| lesshischool | -5091.9424<br>(5705.4504)     |           |
| collegeplus  | -2801.7920<br>(5665.9909)     |           |
| poor         | 13108.7461*<br>(7017.8303)    |           |
| nearpoor     | 1972.5231<br>(8211.1285)      |           |
| middleinc    | -694.3279<br>(6971.1117)      |           |
| highinc      | 7079.5527<br>(6866.5864)      |           |
| _cons        | 24387.1751**<br>(11989.2917)  |           |
| No. of Obs.  | 1788.0000                     | 1788.0000 |
| R-Squared    |                               |           |

---

|              | (1)<br>inpatient<br>Coef./std.errors | (2)<br>Coef./std.errors      |
|--------------|--------------------------------------|------------------------------|
| main         |                                      |                              |
| overweight   | -0.1800<br>(0.1471)                  |                              |
| obese        | 0.0851<br>(0.1744)                   |                              |
| female       | 0.1511<br>(0.1459)                   |                              |
| smoker       | 0.2375<br>(0.2430)                   |                              |
| married      | -0.3275**<br>(0.1488)                |                              |
| black        | 0.1684<br>(0.2729)                   |                              |
| amind        | -0.0440<br>(0.4946)                  |                              |
| asian        | 0.4063*<br>(0.2308)                  |                              |
| othrace      | 0.0000<br>(.)                        |                              |
| midwest      | 0.0650<br>(0.2063)                   |                              |
| south        | 0.1648<br>(0.1847)                   |                              |
| west         | -0.3175<br>(0.2239)                  |                              |
| lesshischool | 0.2553<br>(0.1635)                   |                              |
| collegeplus  | -0.0958<br>(0.1743)                  |                              |
| poor         | 0.1448<br>(0.2038)                   |                              |
| nearpoor     | 0.0239<br>(0.2376)                   |                              |
| middleinc    | -0.2588<br>(0.1944)                  |                              |
| highinc      | 0.3273<br>(0.2016)                   |                              |
| _bs_1        |                                      | -9.5995e+09*<br>(5.5935e+09) |
| _bs_2        |                                      | -0.1879*<br>(0.1032)         |
| _cons        | -1.7877***<br>(0.3531)               |                              |

---

|              |               |           |
|--------------|---------------|-----------|
| glm          |               |           |
| overweight   | -6349.9075*   |           |
|              | (3497.7324)   |           |
| obese        | -6636.9903    |           |
|              | (4059.4558)   |           |
| female       | -4220.1490    |           |
|              | (3602.1244)   |           |
| smoker       | -1869.9759    |           |
|              | (5691.8250)   |           |
| married      | 181.6556      |           |
|              | (3639.2688)   |           |
| black        | -8107.1800    |           |
|              | (6709.0367)   |           |
| amind        | -475.7672     |           |
|              | (12459.2629)  |           |
| asian        | -7005.8709    |           |
|              | (5775.6105)   |           |
| othrace      | 0.0000        |           |
|              | (.)           |           |
| midwest      | -6929.3034    |           |
|              | (4875.9886)   |           |
| south        | 1040.6784     |           |
|              | (4363.4869)   |           |
| west         | -8683.7301    |           |
|              | (5644.2521)   |           |
| lesshischool | -104.5715     |           |
|              | (3944.6007)   |           |
| collegeplus  | -4726.3208    |           |
|              | (4239.8491)   |           |
| poor         | -1170.3682    |           |
|              | (4829.6649)   |           |
| nearpoor     | 177.3089      |           |
|              | (5588.1297)   |           |
| middleinc    | 3726.0471     |           |
|              | (4670.0978)   |           |
| highinc      | 6770.6868     |           |
|              | (4736.7131)   |           |
| _cons        | 30602.7438*** |           |
|              | (8971.9963)   |           |
| No. of Obs.  | 1569.0000     | 1569.0000 |
| R-Squared    |               |           |

---

|              | (1)<br>inpatient<br>Coef./std.errors | (2)<br>Coef./std.errors |
|--------------|--------------------------------------|-------------------------|
| main         |                                      |                         |
| overweight   | 0.0397<br>(0.0691)                   |                         |
| obese        | 0.3142***<br>(0.0689)                |                         |
| age3544      | -0.4009***<br>(0.0985)               |                         |
| age4554      | -0.1961**<br>(0.0935)                |                         |
| age5564      | 0.1120<br>(0.0934)                   |                         |
| age6574      | 0.4727***<br>(0.0916)                |                         |
| age75plus    | 0.8456***<br>(0.0902)                |                         |
| female       | 0.4513***<br>(0.0594)                |                         |
| smoker       | 0.0332<br>(0.0750)                   |                         |
| married      | 0.0774<br>(0.0605)                   |                         |
| black        | 0.1399<br>(0.0992)                   |                         |
| amind        | -0.0391<br>(0.1736)                  |                         |
| asian        | 0.0814<br>(0.0859)                   |                         |
| othrace      | 0.0000<br>(.)                        |                         |
| midwest      | 0.1499*<br>(0.0906)                  |                         |
| south        | 0.1026<br>(0.0833)                   |                         |
| west         | -0.0940<br>(0.0937)                  |                         |
| lesshischool | 0.0792<br>(0.0754)                   |                         |
| collegeplus  | -0.0198<br>(0.0682)                  |                         |
| poor         | 0.4048***<br>(0.0925)                |                         |
| nearpoor     | 0.1713<br>(0.1219)                   |                         |

|              |                             |                             |
|--------------|-----------------------------|-----------------------------|
| middleinc    | -0.2740***<br>(0.0886)      |                             |
| highinc      | -0.3763***<br>(0.0923)      |                             |
| _bs_1        |                             | -3.7452e+09<br>(8.5965e+09) |
| _bs_2        |                             | -0.0175<br>(0.0400)         |
| _cons        | -2.7393***<br>(0.1490)      |                             |
| <hr/>        |                             |                             |
| glm          |                             |                             |
| overweight   | -1342.0693<br>(1496.3188)   |                             |
| obese        | -212.9111<br>(1486.0076)    |                             |
| age3544      | 4193.2001*<br>(2205.2329)   |                             |
| age4554      | 5325.9214**<br>(2075.1361)  |                             |
| age5564      | 6304.3689***<br>(2082.1172) |                             |
| age6574      | 8513.0130***<br>(2018.8146) |                             |
| age75plus    | 7373.2446***<br>(1982.3560) |                             |
| female       | -2739.4518**<br>(1341.6161) |                             |
| smoker       | -708.7571<br>(1643.0946)    |                             |
| married      | 695.0102<br>(1350.7043)     |                             |
| black        | -715.2612<br>(2156.0719)    |                             |
| amind        | 8071.3503**<br>(3825.0258)  |                             |
| asian        | -1596.0002<br>(1855.0132)   |                             |
| othrace      | 0.0000<br>(.)               |                             |
| midwest      | -674.3758<br>(1964.5481)    |                             |
| south        | -647.9895<br>(1797.8004)    |                             |
| west         | 1369.2276<br>(2062.5835)    |                             |
| lesshischool | 66.2178                     |                             |



|             |               |            |
|-------------|---------------|------------|
|             | (1588.2566)   |            |
| collegeplus | -1940.8780    |            |
|             | (1500.4080)   |            |
| poor        | 2236.8637     |            |
|             | (1981.7048)   |            |
| nearpoor    | 2215.4622     |            |
|             | (2587.5626)   |            |
| middleinc   | 2487.2337     |            |
|             | (1932.3329)   |            |
| highinc     | 5338.4772***  |            |
|             | (1995.3104)   |            |
| _cons       | 10491.4097*** |            |
|             | (3340.8441)   |            |
| <hr/>       |               |            |
| No. of Obs. | 15175.0000    | 15175.0000 |
| R-Squared   |               |            |
| <hr/>       |               |            |

|              | (1)<br>inpatient<br>Coef./std.errors | (2)<br>Coef./std.errors |
|--------------|--------------------------------------|-------------------------|
| main         |                                      |                         |
| overweight   | 0.0943<br>(0.0925)                   |                         |
| obese        | 0.3932***<br>(0.0938)                |                         |
| age3544      | -0.3582***<br>(0.1230)               |                         |
| age4554      | -0.2599**<br>(0.1204)                |                         |
| age5564      | -0.0006<br>(0.1219)                  |                         |
| age6574      | 0.6441***<br>(0.1349)                |                         |
| age75plus    | 1.2545***<br>(0.1299)                |                         |
| female       | 0.5754***<br>(0.0785)                |                         |
| smoker       | -0.0926<br>(0.1112)                  |                         |
| married      | 0.3526***<br>(0.0838)                |                         |
| black        | 0.1383<br>(0.1581)                   |                         |
| amind        | 0.2996<br>(0.2143)                   |                         |
| asian        | 0.1993<br>(0.1314)                   |                         |
| othrace      | 0.0000<br>(.)                        |                         |
| midwest      | 0.1403<br>(0.1180)                   |                         |
| south        | 0.1584<br>(0.1120)                   |                         |
| west         | -0.0178<br>(0.1262)                  |                         |
| lesshischool | -0.0878<br>(0.1210)                  |                         |
| collegeplus  | -0.0194<br>(0.0856)                  |                         |
| poor         | 0.2202<br>(0.1773)                   |                         |
| nearpoor     | 0.1092<br>(0.2132)                   |                         |

|              |                              |                            |
|--------------|------------------------------|----------------------------|
| middleinc    | -0.1390<br>(0.1222)          |                            |
| highinc      | -0.2610**<br>(0.1238)        |                            |
| _bs_1        |                              | 3.7000e+09<br>(7.7183e+09) |
| _bs_2        |                              | 0.0261<br>(0.0538)         |
| _cons        | -3.3757***<br>(0.2147)       |                            |
| <hr/>        |                              |                            |
| glm          |                              |                            |
| overweight   | -48.3398<br>(2145.4784)      |                            |
| obese        | 657.2754<br>(2140.8243)      |                            |
| age3544      | 2675.9633<br>(2878.5112)     |                            |
| age4554      | 4726.5321*<br>(2813.9610)    |                            |
| age5564      | 8963.2408***<br>(2888.3463)  |                            |
| age6574      | 10224.2000***<br>(3131.4725) |                            |
| age75plus    | 5827.9200*<br>(2992.9497)    |                            |
| female       | -1015.0766<br>(1889.3501)    |                            |
| smoker       | -1418.5133<br>(2585.9541)    |                            |
| married      | 350.0539<br>(1900.0883)      |                            |
| black        | 4287.5829<br>(3703.1181)     |                            |
| amind        | 15374.1700***<br>(4946.9518) |                            |
| asian        | 2061.9883<br>(3048.7988)     |                            |
| othrace      | 0.0000<br>(.)                |                            |
| midwest      | 192.0746<br>(2697.1409)      |                            |
| south        | -1174.1773<br>(2562.0536)    |                            |
| west         | 2143.7050<br>(2921.5027)     |                            |
| lesshischool | 1500.3561                    |                            |

|             |             |            |
|-------------|-------------|------------|
|             | (2724.5845) |            |
| collegeplus | -1959.8475  |            |
|             | (1996.6042) |            |
| poor        | -887.3945   |            |
|             | (4015.6845) |            |
| nearpoor    | 1810.8728   |            |
|             | (4785.6879) |            |
| middleinc   | 1453.1394   |            |
|             | (2799.4525) |            |
| highinc     | 2541.7664   |            |
|             | (2836.7083) |            |
| _cons       | 7130.5411   |            |
|             | (5009.9071) |            |
| <hr/>       |             |            |
| No. of Obs. | 11061.0000  | 11061.0000 |
| R-Squared   |             |            |
| <hr/>       |             |            |

|              | (1)<br>inpatient<br>Coef./std.errors | (2)<br>Coef./std.errors |
|--------------|--------------------------------------|-------------------------|
| main         |                                      |                         |
| overweight   | 0.0873<br>(0.1434)                   |                         |
| obese        | 0.1598<br>(0.1353)                   |                         |
| age3544      | -0.5461***<br>(0.1857)               |                         |
| age4554      | -0.0059<br>(0.1682)                  |                         |
| age5564      | 0.1613<br>(0.1874)                   |                         |
| age6574      | 0.1376<br>(0.1900)                   |                         |
| age75plus    | 0.2430<br>(0.1912)                   |                         |
| female       | 0.2618**<br>(0.1308)                 |                         |
| smoker       | -0.1031<br>(0.1318)                  |                         |
| married      | -0.1051<br>(0.1326)                  |                         |
| black        | -0.0237<br>(0.1640)                  |                         |
| amind        | -0.4615<br>(0.4218)                  |                         |
| asian        | 0.1297<br>(0.1511)                   |                         |
| othrace      | 0.0000<br>(.)                        |                         |
| midwest      | 0.4951**<br>(0.1924)                 |                         |
| south        | 0.2635<br>(0.1754)                   |                         |
| west         | -0.0433<br>(0.1807)                  |                         |
| lesshischool | 0.0674<br>(0.1351)                   |                         |
| collegeplus  | 0.2442<br>(0.1663)                   |                         |
| poor         | 0.3774**<br>(0.1628)                 |                         |
| nearpoor     | 0.2626<br>(0.2085)                   |                         |

|              |                              |                            |
|--------------|------------------------------|----------------------------|
| middleinc    | 0.1884<br>(0.2094)           |                            |
| highinc      | -0.3124<br>(0.4367)          |                            |
| _bs_1        |                              | 1.3753e+09<br>(1.6008e+09) |
| _bs_2        |                              | 0.0504<br>(0.0586)         |
| _cons        | -2.2210***<br>(0.2747)       |                            |
| <hr/>        |                              |                            |
| glm          |                              |                            |
| overweight   | 1307.7783<br>(2556.1437)     |                            |
| obese        | 2937.5579<br>(2427.0935)     |                            |
| age3544      | 6985.5575*<br>(3570.5747)    |                            |
| age4554      | 8664.9291***<br>(3072.2427)  |                            |
| age5564      | 1232.1119<br>(3452.3596)     |                            |
| age6574      | 11450.7178***<br>(3497.5120) |                            |
| age75plus    | 3586.6364<br>(3400.0125)     |                            |
| female       | -4900.8808*<br>(2519.0764)   |                            |
| smoker       | 854.9366<br>(2428.2256)      |                            |
| married      | 540.5378<br>(2495.1814)      |                            |
| black        | -1160.3977<br>(3053.2930)    |                            |
| amind        | -7770.4080<br>(8055.4130)    |                            |
| asian        | -2799.0542<br>(2724.9466)    |                            |
| othrace      | 0.0000<br>(.)                |                            |
| midwest      | -441.1397<br>(3479.7089)     |                            |
| south        | -3664.7780<br>(3226.2130)    |                            |
| west         | 3632.1731<br>(3295.3814)     |                            |
| lesshischool | 741.4958                     |                            |

|             |             |           |
|-------------|-------------|-----------|
|             | (2446.4171) |           |
| collegeplus | -1178.5213  |           |
|             | (3023.7249) |           |
| poor        | 5172.6391*  |           |
|             | (3020.8129) |           |
| nearpoor    | 4678.2682   |           |
|             | (3773.2541) |           |
| middleinc   | 2261.5808   |           |
|             | (3830.3614) |           |
| highinc     | 6476.1714   |           |
|             | (8178.0893) |           |
| _cons       | 7571.9173   |           |
|             | (5069.9334) |           |
| <hr/>       |             |           |
| No. of Obs. | 2245.0000   | 2245.0000 |
| R-Squared   |             |           |
| <hr/>       |             |           |

|              | (1)<br>inpatient<br>Coef./std.errors | (2)<br>Coef./std.errors |
|--------------|--------------------------------------|-------------------------|
| main         |                                      |                         |
| overweight   | -0.0778<br>(0.1045)                  |                         |
| obese        | 0.1786<br>(0.1091)                   |                         |
| age3544      | 0.2162<br>(0.4525)                   |                         |
| age4554      | 0.0135<br>(0.4160)                   |                         |
| age5564      | 0.2490<br>(0.4019)                   |                         |
| age6574      | -0.1664<br>(0.3826)                  |                         |
| age75plus    | 0.1857<br>(0.3822)                   |                         |
| female       | 0.0820<br>(0.0913)                   |                         |
| smoker       | -0.0188<br>(0.1264)                  |                         |
| married      | -0.1468<br>(0.0951)                  |                         |
| black        | 0.0630<br>(0.1639)                   |                         |
| amind        | -0.5121<br>(0.3366)                  |                         |
| asian        | 0.0076<br>(0.1427)                   |                         |
| othrace      | 0.0000<br>(.)                        |                         |
| midwest      | 0.1575<br>(0.1399)                   |                         |
| south        | 0.0880<br>(0.1264)                   |                         |
| west         | -0.1059<br>(0.1492)                  |                         |
| lesshischool | 0.0272<br>(0.1090)                   |                         |
| collegeplus  | -0.0994<br>(0.1085)                  |                         |
| poor         | 0.0825<br>(0.1337)                   |                         |
| nearpoor     | 0.2189<br>(0.1589)                   |                         |



|              |               |               |
|--------------|---------------|---------------|
| middleinc    | -0.2334*      |               |
|              | (0.1325)      |               |
| highinc      | 0.0741        |               |
|              | (0.1375)      |               |
| _bs_1        |               | -1.5040e+10** |
|              |               | (6.4348e+09)  |
| _bs_2        |               | -0.1378**     |
|              |               | (0.0560)      |
| _cons        | -1.5968***    |               |
|              | (0.4267)      |               |
| <hr/>        |               |               |
| glm          |               |               |
| overweight   | -5907.6720**  |               |
|              | (2745.2663)   |               |
| obese        | -4422.5103    |               |
|              | (2889.1435)   |               |
| age3544      | 6918.3370     |               |
|              | (11686.4263)  |               |
| age4554      | -2807.1766    |               |
|              | (10846.5192)  |               |
| age5564      | -1647.1339    |               |
|              | (10449.7767)  |               |
| age6574      | -463.9785     |               |
|              | (10003.8583)  |               |
| age75plus    | -1450.6572    |               |
|              | (10067.6837)  |               |
| female       | -2126.5168    |               |
|              | (2467.3036)   |               |
| smoker       | 157.8656      |               |
|              | (3298.5305)   |               |
| married      | 3503.6610     |               |
|              | (2632.2122)   |               |
| black        | -4369.6474    |               |
|              | (4297.7534)   |               |
| amind        | 42099.7292*** |               |
|              | (9239.1008)   |               |
| asian        | -4710.1593    |               |
|              | (3756.2672)   |               |
| othrace      | 0.0000        |               |
|              | (.)           |               |
| midwest      | -4349.2425    |               |
|              | (3643.1770)   |               |
| south        | -693.5824     |               |
|              | (3289.4661)   |               |
| west         | -1769.0440    |               |
|              | (4064.7493)   |               |
| lesshischool | -1763.4468    |               |

|             |              |           |
|-------------|--------------|-----------|
|             | (2857.8510)  |           |
| collegeplus | -4289.6647   |           |
|             | (2884.7446)  |           |
| poor        | 3059.2476    |           |
|             | (3499.8449)  |           |
| nearpoor    | 1559.6471    |           |
|             | (4096.6794)  |           |
| middleinc   | 1656.5610    |           |
|             | (3517.3535)  |           |
| highinc     | 7712.8767**  |           |
|             | (3578.8089)  |           |
| _cons       | 24796.7558** |           |
|             | (11601.8260) |           |
| <hr/>       |              |           |
| No. of Obs. | 3861.0000    | 3861.0000 |
| R-Squared   |              |           |
| <hr/>       |              |           |

|              | (1)                    | (2)              |
|--------------|------------------------|------------------|
|              | totalexp               |                  |
|              | Coef./std.errors       | Coef./std.errors |
| main         |                        |                  |
| overweight   | 0.0204<br>(0.1061)     |                  |
| obese        | 0.1951<br>(0.1228)     |                  |
| unins        | -0.8434***<br>(0.1164) |                  |
| medicaid     | 0.4269**<br>(0.1913)   |                  |
| medicare     | 0.6232<br>(0.5753)     |                  |
| female       | 1.0096***<br>(0.0973)  |                  |
| smoker       | 0.1437<br>(0.1199)     |                  |
| married      | 0.2498**<br>(0.1027)   |                  |
| black        | 0.0538<br>(0.1722)     |                  |
| amind        | -0.2361<br>(0.2478)    |                  |
| asian        | 0.4107***<br>(0.1325)  |                  |
| othrace      | 0.0000<br>(.)          |                  |
| midwest      | -0.0612<br>(0.1470)    |                  |
| south        | -0.1024<br>(0.1365)    |                  |
| west         | -0.2088<br>(0.1502)    |                  |
| lesshischool | -0.0119<br>(0.1351)    |                  |
| collegeplus  | -0.0885<br>(0.1164)    |                  |
| poor         | 0.2753<br>(0.1754)     |                  |
| nearpoor     | 0.4046<br>(0.2505)     |                  |
| middleinc    | -0.0789<br>(0.1462)    |                  |
| highinc      | 0.0699<br>(0.1523)     |                  |

|             |           |              |
|-------------|-----------|--------------|
| _bs_1       |           | 4.2745e+09*  |
|             |           | (2.3400e+09) |
| _bs_2       |           | 0.0452*      |
|             |           | (0.0242)     |
| _cons       | 6.4661*** |              |
|             | (0.2287)  |              |
| No. of Obs. | 5848.0000 | 5848.0000    |
| R-Squared   |           |              |

|              | (1)                    | (2)              |
|--------------|------------------------|------------------|
|              | totalexp               |                  |
|              | Coef./std.errors       | Coef./std.errors |
| main         |                        |                  |
| overweight   | -0.0652<br>(0.1092)    |                  |
| obese        | 0.4905***<br>(0.1150)  |                  |
| unins        | -0.9031***<br>(0.1195) |                  |
| medicaid     | 0.6286***<br>(0.2090)  |                  |
| medicare     | 1.0692***<br>(0.3111)  |                  |
| female       | 0.3313***<br>(0.0901)  |                  |
| smoker       | 0.2213*<br>(0.1173)    |                  |
| married      | 0.0062<br>(0.0974)     |                  |
| black        | 0.4106**<br>(0.1782)   |                  |
| amind        | 0.2468<br>(0.2258)     |                  |
| asian        | 0.5006***<br>(0.1335)  |                  |
| othrace      | 0.0000<br>(.)          |                  |
| midwest      | 0.1265<br>(0.1407)     |                  |
| south        | -0.1090<br>(0.1285)    |                  |
| west         | 0.0233<br>(0.1370)     |                  |
| lesshischool | 0.1363<br>(0.1493)     |                  |
| collegeplus  | 0.3816***<br>(0.1085)  |                  |
| poor         | -0.2008<br>(0.1948)    |                  |
| nearpoor     | 0.2493<br>(0.2660)     |                  |
| middleinc    | -0.2557*<br>(0.1509)   |                  |
| highinc      | -0.1699<br>(0.1541)    |                  |

|             |                       |                               |
|-------------|-----------------------|-------------------------------|
| _bs_1       |                       | 1.3683e+10***<br>(3.1355e+09) |
| _bs_2       |                       | 0.1658***<br>(0.0379)         |
| _cons       | 6.7818***<br>(0.2380) |                               |
| No. of Obs. | 3885.0000             | 3885.0000                     |
| R-Squared   |                       |                               |

|              | (1)                    | (2)              |
|--------------|------------------------|------------------|
|              | totalexp               |                  |
|              | Coef./std.errors       | Coef./std.errors |
| main         |                        |                  |
| overweight   | 0.2736***<br>(0.0978)  |                  |
| obese        | 0.4029***<br>(0.1004)  |                  |
| unins        | -0.4409***<br>(0.1143) |                  |
| medicaid     | 0.8227***<br>(0.2011)  |                  |
| medicare     | 1.2996***<br>(0.2083)  |                  |
| female       | 0.3170***<br>(0.0802)  |                  |
| smoker       | -0.1883**<br>(0.0951)  |                  |
| married      | 0.0048<br>(0.0897)     |                  |
| black        | 0.4908***<br>(0.1718)  |                  |
| amind        | -0.3147<br>(0.2454)    |                  |
| asian        | 0.5055***<br>(0.1334)  |                  |
| othrace      | 0.0000<br>(.)          |                  |
| midwest      | -0.0125<br>(0.1239)    |                  |
| south        | -0.1594<br>(0.1157)    |                  |
| west         | -0.1043<br>(0.1235)    |                  |
| lesshischool | 0.0488<br>(0.1324)     |                  |
| collegeplus  | 0.1263<br>(0.0887)     |                  |
| poor         | 0.3230*<br>(0.1910)    |                  |
| nearpoor     | -0.1076<br>(0.2660)    |                  |
| middleinc    | -0.0738<br>(0.1506)    |                  |
| highinc      | -0.0281<br>(0.1494)    |                  |

|             |                       |                               |
|-------------|-----------------------|-------------------------------|
| _bs_1       |                       | 1.6904e+10***<br>(4.6202e+09) |
| _bs_2       |                       | 0.1297***<br>(0.0318)         |
| _cons       | 7.1876***<br>(0.2230) |                               |
| No. of Obs. | 3914.0000             | 3914.0000                     |
| R-Squared   |                       |                               |



|              | (1)<br>totalexp<br>Coef./std.errors | (2)<br>Coef./std.errors |
|--------------|-------------------------------------|-------------------------|
| main         |                                     |                         |
| overweight   | 0.0466<br>(0.1011)                  |                         |
| obese        | 0.4555***<br>(0.1048)               |                         |
| unins        | -0.4590***<br>(0.1314)              |                         |
| medicaid     | 0.6807***<br>(0.2220)               |                         |
| medicare     | 0.8395***<br>(0.1676)               |                         |
| female       | 0.0140<br>(0.0847)                  |                         |
| smoker       | -0.0650<br>(0.1079)                 |                         |
| married      | -0.0331<br>(0.0932)                 |                         |
| black        | 0.5263***<br>(0.1977)               |                         |
| amind        | 0.0307<br>(0.2448)                  |                         |
| asian        | 0.5825***<br>(0.1589)               |                         |
| othrace      | 0.0000<br>(.)                       |                         |
| midwest      | 0.2383*<br>(0.1273)                 |                         |
| south        | 0.2901**<br>(0.1155)                |                         |
| west         | 0.1142<br>(0.1316)                  |                         |
| lesshischool | -0.0198<br>(0.1328)                 |                         |
| collegeplus  | -0.1009<br>(0.0973)                 |                         |
| poor         | 0.2319<br>(0.2017)                  |                         |
| nearpoor     | 0.4341<br>(0.2767)                  |                         |
| middleinc    | 0.4838***<br>(0.1634)               |                         |
| highinc      | 0.3803**<br>(0.1643)                |                         |

|             |                       |                               |
|-------------|-----------------------|-------------------------------|
| _bs_1       |                       | 2.4986e+10***<br>(7.1668e+09) |
| _bs_2       |                       | 0.1670***<br>(0.0467)         |
| _cons       | 7.2520***<br>(0.2502) |                               |
| No. of Obs. | 2892.0000             | 2892.0000                     |
| R-Squared   |                       |                               |

|              | (1)<br>totalexp<br>Coef./std.errors | (2)<br>Coef./std.errors      |
|--------------|-------------------------------------|------------------------------|
| main         |                                     |                              |
| overweight   | -0.0473<br>(0.1254)                 |                              |
| obese        | 0.2849**<br>(0.1307)                |                              |
| female       | -0.0561<br>(0.1069)                 |                              |
| smoker       | -0.0497<br>(0.1487)                 |                              |
| married      | 0.1208<br>(0.1126)                  |                              |
| black        | -0.0729<br>(0.2560)                 |                              |
| amind        | 0.2613<br>(0.3338)                  |                              |
| asian        | -0.0936<br>(0.2021)                 |                              |
| othrace      | 0.0000<br>(.)                       |                              |
| midwest      | 0.1737<br>(0.1571)                  |                              |
| south        | 0.1125<br>(0.1391)                  |                              |
| west         | 0.1414<br>(0.1663)                  |                              |
| lesshischool | -0.0983<br>(0.1434)                 |                              |
| collegeplus  | 0.0649<br>(0.1220)                  |                              |
| poor         | 0.3367<br>(0.2113)                  |                              |
| nearpoor     | 0.4192*<br>(0.2313)                 |                              |
| middleinc    | 0.0154<br>(0.1632)                  |                              |
| highinc      | -0.0253<br>(0.1647)                 |                              |
| _bs_1        |                                     | 9.9319e+09**<br>(4.4815e+09) |
| _bs_2        |                                     | 0.0913**<br>(0.0410)         |
| _cons        | 8.5477***<br>(0.2932)               |                              |

---

|             |           |           |
|-------------|-----------|-----------|
| No. of Obs. | 1788.0000 | 1788.0000 |
| R-Squared   |           |           |

---

|              | (1)<br>totalexp<br>Coef./std.errors | (2)<br>Coef./std.errors    |
|--------------|-------------------------------------|----------------------------|
| main         |                                     |                            |
| overweight   | -0.0792<br>(0.0941)                 |                            |
| obese        | 0.1280<br>(0.1198)                  |                            |
| female       | 0.0238<br>(0.0951)                  |                            |
| smoker       | 0.0647<br>(0.1860)                  |                            |
| married      | -0.0816<br>(0.0934)                 |                            |
| black        | 0.3679<br>(0.2431)                  |                            |
| amind        | 0.2020<br>(0.3113)                  |                            |
| asian        | 0.2700<br>(0.1911)                  |                            |
| othrace      | 0.0000<br>(.)                       |                            |
| midwest      | -0.1310<br>(0.1262)                 |                            |
| south        | 0.1188<br>(0.1177)                  |                            |
| west         | -0.4036***<br>(0.1381)              |                            |
| lesshischool | 0.0919<br>(0.1141)                  |                            |
| collegeplus  | -0.0797<br>(0.1030)                 |                            |
| poor         | -0.0712<br>(0.1664)                 |                            |
| nearpoor     | 0.1591<br>(0.1750)                  |                            |
| middleinc    | -0.0038<br>(0.1203)                 |                            |
| highinc      | 0.1991<br>(0.1266)                  |                            |
| _bs_1        |                                     | 2.9394e+09<br>(2.7348e+09) |
| _bs_2        |                                     | 0.0245<br>(0.0226)         |
| _cons        | 8.6934***<br>(0.2599)               |                            |

---

|             |           |           |
|-------------|-----------|-----------|
| No. of Obs. | 1569.0000 | 1569.0000 |
| R-Squared   |           |           |

---

|              | (1)                   | (2)              |
|--------------|-----------------------|------------------|
|              | totalexp              |                  |
|              | Coef./std.errors      | Coef./std.errors |
| main         |                       |                  |
| overweight   | 0.0437<br>(0.0515)    |                  |
| obese        | 0.3912***<br>(0.0555) |                  |
| age3544      | 0.2313***<br>(0.0661) |                  |
| age4554      | 0.6339***<br>(0.0664) |                  |
| age5564      | 1.0313***<br>(0.0708) |                  |
| age6574      | 1.2251***<br>(0.0801) |                  |
| age75plus    | 1.4062***<br>(0.0825) |                  |
| female       | 0.3588***<br>(0.0444) |                  |
| smoker       | -0.0141<br>(0.0599)   |                  |
| married      | 0.0980**<br>(0.0464)  |                  |
| black        | 0.1814*<br>(0.0990)   |                  |
| amind        | -0.0161<br>(0.1264)   |                  |
| asian        | 0.2357***<br>(0.0776) |                  |
| othrace      | 0.0000<br>(.)         |                  |
| midwest      | 0.0947<br>(0.0658)    |                  |
| south        | 0.0122<br>(0.0609)    |                  |
| west         | -0.0515<br>(0.0676)   |                  |
| lesshischool | 0.1138<br>(0.0697)    |                  |
| collegeplus  | 0.0402<br>(0.0513)    |                  |
| poor         | 0.3350***<br>(0.1019) |                  |
| nearpoor     | 0.3041**<br>(0.1315)  |                  |

|             |                       |                               |
|-------------|-----------------------|-------------------------------|
| middleinc   | -0.1079<br>(0.0769)   |                               |
| highinc     | -0.1510**<br>(0.0762) |                               |
| _bs_1       |                       | 7.3640e+10***<br>(1.1371e+10) |
| _bs_2       |                       | 0.1142***<br>(0.0168)         |
| _cons       | 6.9718***<br>(0.1230) |                               |
| No. of Obs. | 15175.0000            | 15175.0000                    |
| R-Squared   |                       |                               |



|              | (1)                   | (2)              |
|--------------|-----------------------|------------------|
|              | totalexp              |                  |
|              | Coef./std.errors      | Coef./std.errors |
| main         |                       |                  |
| overweight   | 0.0715<br>(0.0635)    |                  |
| obese        | 0.4105***<br>(0.0693) |                  |
| age3544      | 0.2066***<br>(0.0781) |                  |
| age4554      | 0.5940***<br>(0.0790) |                  |
| age5564      | 1.0117***<br>(0.0843) |                  |
| age6574      | 1.3429***<br>(0.1133) |                  |
| age75plus    | 1.5228***<br>(0.1210) |                  |
| female       | 0.4655***<br>(0.0548) |                  |
| smoker       | -0.1295*<br>(0.0739)  |                  |
| married      | 0.1774***<br>(0.0565) |                  |
| black        | 0.1548<br>(0.1292)    |                  |
| amind        | 0.1423<br>(0.1568)    |                  |
| asian        | 0.3374***<br>(0.0991) |                  |
| othrace      | 0.0000<br>(.)         |                  |
| midwest      | 0.1083<br>(0.0801)    |                  |
| south        | -0.0122<br>(0.0753)   |                  |
| west         | -0.0616<br>(0.0835)   |                  |
| lesshischool | 0.0662<br>(0.0960)    |                  |
| collegeplus  | 0.0395<br>(0.0629)    |                  |
| poor         | 0.0677<br>(0.1683)    |                  |
| nearpoor     | 0.1552<br>(0.2074)    |                  |

|             |                       |                               |
|-------------|-----------------------|-------------------------------|
| middleinc   | -0.0577<br>(0.1022)   |                               |
| highinc     | -0.0999<br>(0.1004)   |                               |
| _bs_1       |                       | 5.2642e+10***<br>(9.8169e+09) |
| _bs_2       |                       | 0.1151***<br>(0.0208)         |
| _cons       | 6.7254***<br>(0.1568) |                               |
| No. of Obs. | 11061.0000            | 11061.0000                    |
| R-Squared   |                       |                               |

|              | (1)<br>totalexp<br>Coef./std.errors | (2)<br>Coef./std.errors |
|--------------|-------------------------------------|-------------------------|
| main         |                                     |                         |
| overweight   | -0.0094<br>(0.1098)                 |                         |
| obese        | 0.3012***<br>(0.1064)               |                         |
| age3544      | 0.4635***<br>(0.1293)               |                         |
| age4554      | 1.0192***<br>(0.1355)               |                         |
| age5564      | 1.0542***<br>(0.1555)               |                         |
| age6574      | 1.0825***<br>(0.1596)               |                         |
| age75plus    | 0.9112***<br>(0.1694)               |                         |
| female       | -0.0296<br>(0.0994)                 |                         |
| smoker       | 0.1052<br>(0.1034)                  |                         |
| married      | -0.1654<br>(0.1076)                 |                         |
| black        | 0.2258<br>(0.1466)                  |                         |
| amind        | -0.8830***<br>(0.2382)              |                         |
| asian        | 0.1188<br>(0.1253)                  |                         |
| othrace      | 0.0000<br>(.)                       |                         |
| midwest      | 0.2749**<br>(0.1373)                |                         |
| south        | -0.0420<br>(0.1253)                 |                         |
| west         | 0.1612<br>(0.1264)                  |                         |
| lesshischool | 0.0023<br>(0.1036)                  |                         |
| collegeplus  | 0.0635<br>(0.1217)                  |                         |
| poor         | 0.1436<br>(0.1255)                  |                         |
| nearpoor     | 0.3095*<br>(0.1620)                 |                         |

|             |                       |                              |
|-------------|-----------------------|------------------------------|
| middleinc   | 0.1170<br>(0.1466)    |                              |
| highinc     | 0.1277<br>(0.2411)    |                              |
| _bs_1       |                       | 9.2384e+09**<br>(4.1093e+09) |
| _bs_2       |                       | 0.1147**<br>(0.0497)         |
| _cons       | 7.6531***<br>(0.2081) |                              |
| No. of Obs. | 2245.0000             | 2245.0000                    |
| R-Squared   |                       |                              |

|              | (1)<br>totalexp<br>Coef./std.errors | (2)<br>Coef./std.errors |
|--------------|-------------------------------------|-------------------------|
| main         |                                     |                         |
| overweight   | -0.0657<br>(0.0770)                 |                         |
| obese        | 0.2678***<br>(0.0860)               |                         |
| age3544      | 0.7813**<br>(0.3779)                |                         |
| age4554      | 1.0993***<br>(0.3495)               |                         |
| age5564      | 1.0644***<br>(0.3381)               |                         |
| age6574      | 0.5049<br>(0.3162)                  |                         |
| age75plus    | 0.7377**<br>(0.3184)                |                         |
| female       | -0.0300<br>(0.0690)                 |                         |
| smoker       | -0.0258<br>(0.1034)                 |                         |
| married      | 0.0504<br>(0.0722)                  |                         |
| black        | 0.0461<br>(0.1697)                  |                         |
| amind        | 0.1830<br>(0.2333)                  |                         |
| asian        | -0.0180<br>(0.1376)                 |                         |
| othrace      | 0.0000<br>(.)                       |                         |
| midwest      | 0.0293<br>(0.0993)                  |                         |
| south        | 0.1050<br>(0.0899)                  |                         |
| west         | -0.0513<br>(0.1080)                 |                         |
| lesshischool | 0.0082<br>(0.0875)                  |                         |
| collegeplus  | -0.0242<br>(0.0777)                 |                         |
| poor         | 0.0955<br>(0.1218)                  |                         |
| nearpoor     | 0.3156**<br>(0.1392)                |                         |

|             |                       |                               |
|-------------|-----------------------|-------------------------------|
| middleinc   | 0.0080<br>(0.0970)    |                               |
| highinc     | 0.1428<br>(0.1001)    |                               |
| _bs_1       |                       | 2.2698e+10***<br>(6.9622e+09) |
| _bs_2       |                       | 0.0814***<br>(0.0244)         |
| _cons       | 8.0851***<br>(0.3548) |                               |
| No. of Obs. | 3861.0000             | 3861.0000                     |
| R-Squared   |                       |                               |

|              | (1)<br>outpatient<br>Coef./std.errors | (2)<br>Coef./std.errors |
|--------------|---------------------------------------|-------------------------|
| main         |                                       |                         |
| overweight   | -0.1027<br>(0.1214)                   |                         |
| obese        | 0.3668***<br>(0.1273)                 |                         |
| unins        | -0.9986***<br>(0.1335)                |                         |
| medicaid     | 0.4431*<br>(0.2318)                   |                         |
| medicare     | 0.6793**<br>(0.3429)                  |                         |
| female       | 0.4223***<br>(0.1016)                 |                         |
| smoker       | 0.1162<br>(0.1289)                    |                         |
| married      | 0.0224<br>(0.1064)                    |                         |
| black        | 0.2923<br>(0.1969)                    |                         |
| amind        | -0.2888<br>(0.2394)                   |                         |
| asian        | 0.5741***<br>(0.1449)                 |                         |
| othrace      | 0.0000<br>(.)                         |                         |
| midwest      | 0.1421<br>(0.1536)                    |                         |
| south        | -0.1137<br>(0.1412)                   |                         |
| west         | 0.0294<br>(0.1512)                    |                         |
| lesshischool | 0.1792<br>(0.1666)                    |                         |
| collegeplus  | 0.3630***<br>(0.1177)                 |                         |
| poor         | -0.4114*<br>(0.2172)                  |                         |
| nearpoor     | -0.0688<br>(0.2989)                   |                         |
| middleinc    | -0.2957*<br>(0.1713)                  |                         |
| highinc      | -0.3230*<br>(0.1732)                  |                         |

|             |                       |                               |
|-------------|-----------------------|-------------------------------|
| _bs_1       |                       | 4.0495e+09***<br>(1.5384e+09) |
| _bs_2       |                       | 0.1208***<br>(0.0460)         |
| _cons       | 6.0538***<br>(0.2667) |                               |
| No. of Obs. | 3885.0000             | 3885.0000                     |
| R-Squared   |                       |                               |



|              | (1)<br>outpatient<br>Coef./std.errors | (2)<br>Coef./std.errors |
|--------------|---------------------------------------|-------------------------|
| main         |                                       |                         |
| overweight   | 0.2410**<br>(0.0992)                  |                         |
| obese        | 0.3459***<br>(0.1026)                 |                         |
| unins        | -0.6880***<br>(0.1130)                |                         |
| medicaid     | 0.4028*<br>(0.2118)                   |                         |
| medicare     | 0.7299***<br>(0.2166)                 |                         |
| female       | 0.4919***<br>(0.0832)                 |                         |
| smoker       | -0.1525<br>(0.0970)                   |                         |
| married      | -0.1352<br>(0.0909)                   |                         |
| black        | 0.2754<br>(0.1734)                    |                         |
| amind        | -0.2429<br>(0.2489)                   |                         |
| asian        | 0.2545*<br>(0.1365)                   |                         |
| othrace      | 0.0000<br>(.)                         |                         |
| midwest      | 0.0364<br>(0.1269)                    |                         |
| south        | -0.3025***<br>(0.1172)                |                         |
| west         | -0.2172*<br>(0.1273)                  |                         |
| lesshischool | 0.0899<br>(0.1358)                    |                         |
| collegeplus  | 0.3007***<br>(0.0895)                 |                         |
| poor         | 0.1157<br>(0.1960)                    |                         |
| nearpoor     | -0.2806<br>(0.2738)                   |                         |
| middleinc    | 0.0267<br>(0.1528)                    |                         |
| highinc      | 0.1562<br>(0.1518)                    |                         |

|             |                       |                               |
|-------------|-----------------------|-------------------------------|
| _bs_1       |                       | 4.6757e+09***<br>(1.3864e+09) |
| _bs_2       |                       | 0.1033***<br>(0.0294)         |
| _cons       | 6.3855***<br>(0.2253) |                               |
| No. of Obs. | 3914.0000             | 3914.0000                     |
| R-Squared   |                       |                               |

|              | (1)<br>outpatient<br>Coef./std.errors | (2)<br>Coef./std.errors |
|--------------|---------------------------------------|-------------------------|
| main         |                                       |                         |
| overweight   | -0.2289**<br>(0.1112)                 |                         |
| obese        | 0.1651<br>(0.1167)                    |                         |
| unins        | -0.5553***<br>(0.1455)                |                         |
| medicaid     | 0.7424***<br>(0.2525)                 |                         |
| medicare     | 0.9900***<br>(0.1889)                 |                         |
| female       | 0.1156<br>(0.0942)                    |                         |
| smoker       | -0.2064*<br>(0.1203)                  |                         |
| married      | -0.0448<br>(0.1048)                   |                         |
| black        | 0.4019*<br>(0.2274)                   |                         |
| amind        | 0.0493<br>(0.2709)                    |                         |
| asian        | 0.7409***<br>(0.1774)                 |                         |
| othrace      | 0.0000<br>(.)                         |                         |
| midwest      | 0.2339*<br>(0.1390)                   |                         |
| south        | 0.2190*<br>(0.1285)                   |                         |
| west         | 0.0263<br>(0.1451)                    |                         |
| lesshischool | -0.1697<br>(0.1516)                   |                         |
| collegeplus  | -0.0301<br>(0.1077)                   |                         |
| poor         | -0.2492<br>(0.2258)                   |                         |
| nearpoor     | -0.3373<br>(0.3019)                   |                         |
| middleinc    | 0.2169<br>(0.1818)                    |                         |
| highinc      | 0.2714<br>(0.1815)                    |                         |

|             |           |              |
|-------------|-----------|--------------|
| _bs_1       |           | 3.6244e+09   |
|             |           | (3.0685e+09) |
| _bs_2       |           | 0.0640       |
|             |           | (0.0544)     |
| _cons       | 6.5496*** |              |
|             | (0.2874)  |              |
| <hr/>       |           |              |
| No. of Obs. | 2892.0000 | 2892.0000    |
| R-Squared   |           |              |
| <hr/>       |           |              |

|              | (1)<br>outpatient<br>Coef./std.errors | (2)<br>Coef./std.errors    |
|--------------|---------------------------------------|----------------------------|
| main         |                                       |                            |
| overweight   | -0.0755<br>(0.1208)                   |                            |
| obese        | 0.0432<br>(0.1272)                    |                            |
| female       | -0.1212<br>(0.1025)                   |                            |
| smoker       | -0.3685**<br>(0.1462)                 |                            |
| married      | 0.0991<br>(0.1068)                    |                            |
| black        | -0.1306<br>(0.2609)                   |                            |
| amind        | -0.8884***<br>(0.3162)                |                            |
| asian        | -0.2287<br>(0.2061)                   |                            |
| othrace      | 0.0000<br>(.)                         |                            |
| midwest      | 0.3851**<br>(0.1543)                  |                            |
| south        | 0.1601<br>(0.1359)                    |                            |
| west         | 0.1862<br>(0.1602)                    |                            |
| lesshischool | -0.1978<br>(0.1423)                   |                            |
| collegeplus  | 0.3143***<br>(0.1178)                 |                            |
| poor         | 0.2264<br>(0.2059)                    |                            |
| nearpoor     | 0.3622<br>(0.2287)                    |                            |
| middleinc    | 0.2927*<br>(0.1610)                   |                            |
| highinc      | 0.1678<br>(0.1587)                    |                            |
| _bs_1        |                                       | 4.7635e+08<br>(1.5809e+09) |
| _bs_2        |                                       | 0.0138<br>(0.0459)         |
| _cons        | 7.4022***<br>(0.2872)                 |                            |

---

|             |           |           |
|-------------|-----------|-----------|
| No. of Obs. | 1788.0000 | 1788.0000 |
| R-Squared   |           |           |

---

|              | (1)<br>outpatient<br>Coef./std.errors | (2)<br>Coef./std.errors       |
|--------------|---------------------------------------|-------------------------------|
| main         |                                       |                               |
| overweight   | 0.0811<br>(0.0987)                    |                               |
| obese        | 0.4183***<br>(0.1234)                 |                               |
| female       | 0.0520<br>(0.0956)                    |                               |
| smoker       | -0.1391<br>(0.1883)                   |                               |
| married      | 0.1372<br>(0.0962)                    |                               |
| black        | 0.8850***<br>(0.2509)                 |                               |
| amind        | 0.1554<br>(0.3212)                    |                               |
| asian        | 0.4540**<br>(0.1995)                  |                               |
| othrace      | 0.0000<br>(.)                         |                               |
| midwest      | 0.0897<br>(0.1296)                    |                               |
| south        | -0.1830<br>(0.1196)                   |                               |
| west         | -0.3427**<br>(0.1396)                 |                               |
| lesshischool | -0.0646<br>(0.1145)                   |                               |
| collegeplus  | 0.2552**<br>(0.1054)                  |                               |
| poor         | -0.0445<br>(0.1729)                   |                               |
| nearpoor     | 0.1577<br>(0.1831)                    |                               |
| middleinc    | 0.1259<br>(0.1222)                    |                               |
| highinc      | 0.3251**<br>(0.1272)                  |                               |
| _bs_1        |                                       | 2.7863e+09***<br>(1.0232e+09) |
| _bs_2        |                                       | 0.0822***<br>(0.0282)         |
| _cons        | 6.8784***<br>(0.2669)                 |                               |

---

|             |           |           |
|-------------|-----------|-----------|
| No. of Obs. | 1569.0000 | 1569.0000 |
| R-Squared   |           |           |

---



|              | (1)<br>outpatient<br>Coef./std.errors | (2)<br>Coef./std.errors |
|--------------|---------------------------------------|-------------------------|
| main         |                                       |                         |
| overweight   | 0.0138<br>(0.0514)                    |                         |
| obese        | 0.3065***<br>(0.0552)                 |                         |
| age3544      | 0.2910***<br>(0.0654)                 |                         |
| age4554      | 0.5794***<br>(0.0655)                 |                         |
| age5564      | 1.0383***<br>(0.0698)                 |                         |
| age6574      | 1.0941***<br>(0.0796)                 |                         |
| age75plus    | 1.1276***<br>(0.0819)                 |                         |
| female       | 0.4013***<br>(0.0440)                 |                         |
| smoker       | -0.0517<br>(0.0592)                   |                         |
| married      | 0.0963**<br>(0.0460)                  |                         |
| black        | 0.1853*<br>(0.0986)                   |                         |
| amind        | -0.3514***<br>(0.1254)                |                         |
| asian        | 0.2157***<br>(0.0778)                 |                         |
| othrace      | 0.0000<br>(.)                         |                         |
| midwest      | 0.1591**<br>(0.0656)                  |                         |
| south        | -0.1127*<br>(0.0605)                  |                         |
| west         | -0.0402<br>(0.0674)                   |                         |
| lesshischool | 0.0459<br>(0.0698)                    |                         |
| collegeplus  | 0.1872***<br>(0.0505)                 |                         |
| poor         | 0.1253<br>(0.1019)                    |                         |
| nearpoor     | 0.0567<br>(0.1316)                    |                         |

|             |                       |                               |
|-------------|-----------------------|-------------------------------|
| middleinc   | -0.0501<br>(0.0770)   |                               |
| highinc     | -0.0897<br>(0.0762)   |                               |
| _bs_1       |                       | 2.0014e+10***<br>(3.9859e+09) |
| _bs_2       |                       | 0.0893***<br>(0.0175)         |
| _cons       | 5.9813***<br>(0.1255) |                               |
| No. of Obs. | 15175.0000            | 15175.0000                    |
| R-Squared   |                       |                               |

|              | (1)<br>outpatient<br>Coef./std.errors | (2)<br>Coef./std.errors |
|--------------|---------------------------------------|-------------------------|
| main         |                                       |                         |
| overweight   | 0.0369<br>(0.0619)                    |                         |
| obese        | 0.3229***<br>(0.0678)                 |                         |
| age3544      | 0.3062***<br>(0.0756)                 |                         |
| age4554      | 0.5864***<br>(0.0761)                 |                         |
| age5564      | 1.0427***<br>(0.0814)                 |                         |
| age6574      | 1.2126***<br>(0.1100)                 |                         |
| age75plus    | 1.2876***<br>(0.1181)                 |                         |
| female       | 0.5003***<br>(0.0529)                 |                         |
| smoker       | -0.1231*<br>(0.0716)                  |                         |
| married      | 0.1249**<br>(0.0551)                  |                         |
| black        | 0.0671<br>(0.1263)                    |                         |
| amind        | -0.2324<br>(0.1523)                   |                         |
| asian        | 0.2979***<br>(0.0973)                 |                         |
| othrace      | 0.0000<br>(.)                         |                         |
| midwest      | 0.1819**<br>(0.0782)                  |                         |
| south        | -0.0945<br>(0.0734)                   |                         |
| west         | 0.0073<br>(0.0818)                    |                         |
| lesshischool | 0.0226<br>(0.0944)                    |                         |
| collegeplus  | 0.1566***<br>(0.0607)                 |                         |
| poor         | -0.0452<br>(0.1657)                   |                         |
| nearpoor     | 0.0479<br>(0.2058)                    |                         |

|             |                       |                               |
|-------------|-----------------------|-------------------------------|
| middleinc   | -0.0508<br>(0.1004)   |                               |
| highinc     | -0.0993<br>(0.0979)   |                               |
| _bs_1       |                       | 1.5728e+10***<br>(3.5014e+09) |
| _bs_2       |                       | 0.0904***<br>(0.0197)         |
| _cons       | 5.8228***<br>(0.1581) |                               |
| No. of Obs. | 11061.0000            | 11061.0000                    |
| R-Squared   |                       |                               |

|              | (1)<br>outpatient<br>Coef./std.errors | (2)<br>Coef./std.errors |
|--------------|---------------------------------------|-------------------------|
| main         |                                       |                         |
| overweight   | -0.1732<br>(0.1582)                   |                         |
| obese        | 0.0840<br>(0.1535)                    |                         |
| age3544      | 0.5268***<br>(0.1876)                 |                         |
| age4554      | 0.7082***<br>(0.1890)                 |                         |
| age5564      | 0.8239***<br>(0.2134)                 |                         |
| age6574      | 0.9152***<br>(0.2322)                 |                         |
| age75plus    | 0.7858***<br>(0.2364)                 |                         |
| female       | 0.2670*<br>(0.1372)                   |                         |
| smoker       | 0.1531<br>(0.1457)                    |                         |
| married      | 0.1104<br>(0.1512)                    |                         |
| black        | 0.4116**<br>(0.2007)                  |                         |
| amind        | -1.2003***<br>(0.3286)                |                         |
| asian        | -0.0105<br>(0.1758)                   |                         |
| othrace      | 0.0000<br>(.)                         |                         |
| midwest      | 0.2457<br>(0.1941)                    |                         |
| south        | -0.1839<br>(0.1747)                   |                         |
| west         | -0.0131<br>(0.1845)                   |                         |
| lesshischool | -0.0184<br>(0.1497)                   |                         |
| collegeplus  | 0.1157<br>(0.1718)                    |                         |
| poor         | -0.2468<br>(0.1828)                   |                         |
| nearpoor     | -0.0964<br>(0.2321)                   |                         |

|             |                       |                            |
|-------------|-----------------------|----------------------------|
| middleinc   | -0.0524<br>(0.2140)   |                            |
| highinc     | -0.3333<br>(0.3398)   |                            |
| _bs_1       |                       | 7.2993e+08<br>(1.2765e+09) |
| _bs_2       |                       | 0.0336<br>(0.0592)         |
| _cons       | 6.6930***<br>(0.2967) |                            |
| No. of Obs. | 2245.0000             | 2245.0000                  |
| R-Squared   |                       |                            |

|              | (1)<br>outpatient<br>Coef./std.errors | (2)<br>Coef./std.errors |
|--------------|---------------------------------------|-------------------------|
| main         |                                       |                         |
| overweight   | 0.0302<br>(0.0765)                    |                         |
| obese        | 0.2597***<br>(0.0840)                 |                         |
| age3544      | 0.6736*<br>(0.3753)                   |                         |
| age4554      | 0.8218**<br>(0.3465)                  |                         |
| age5564      | 1.1770***<br>(0.3366)                 |                         |
| age6574      | 0.5185<br>(0.3153)                    |                         |
| age75plus    | 0.6486**<br>(0.3159)                  |                         |
| female       | -0.0409<br>(0.0678)                   |                         |
| smoker       | -0.2658***<br>(0.1028)                |                         |
| married      | 0.1387**<br>(0.0700)                  |                         |
| black        | 0.2236<br>(0.1716)                    |                         |
| amind        | -0.5215**<br>(0.2288)                 |                         |
| asian        | -0.1077<br>(0.1397)                   |                         |
| othrace      | 0.0000<br>(.)                         |                         |
| midwest      | 0.2064**<br>(0.0989)                  |                         |
| south        | -0.0507<br>(0.0891)                   |                         |
| west         | -0.0262<br>(0.1065)                   |                         |
| lesshischool | -0.1136<br>(0.0868)                   |                         |
| collegeplus  | 0.2711***<br>(0.0763)                 |                         |
| poor         | 0.1231<br>(0.1223)                    |                         |
| nearpoor     | 0.2382*<br>(0.1389)                   |                         |

|             |                       |                               |
|-------------|-----------------------|-------------------------------|
| middleinc   | 0.2183**<br>(0.0964)  |                               |
| highinc     | 0.2574***<br>(0.0979) |                               |
| _bs_1       |                       | 6.3116e+09***<br>(1.9492e+09) |
| _bs_2       |                       | 0.0773***<br>(0.0237)         |
| _cons       | 6.7451***<br>(0.3587) |                               |
| No. of Obs. | 3861.0000             | 3861.0000                     |
| R-Squared   |                       |                               |



|              | (1)<br>outpatient<br>Coef./std.errors | (2)<br>Coef./std.errors |
|--------------|---------------------------------------|-------------------------|
| main         |                                       |                         |
| overweight   | 0.0142<br>(0.0959)                    |                         |
| obese        | 0.3695***<br>(0.1111)                 |                         |
| unins        | -0.9198***<br>(0.1014)                |                         |
| medicaid     | 0.4907***<br>(0.1732)                 |                         |
| medicare     | 0.4293<br>(0.5197)                    |                         |
| female       | 0.9185***<br>(0.0865)                 |                         |
| smoker       | 0.2206**<br>(0.1059)                  |                         |
| married      | 0.2741***<br>(0.0909)                 |                         |
| black        | -0.0944<br>(0.1577)                   |                         |
| amind        | -0.2763<br>(0.2246)                   |                         |
| asian        | 0.3910***<br>(0.1203)                 |                         |
| othrace      | 0.0000<br>(.)                         |                         |
| midwest      | -0.0658<br>(0.1328)                   |                         |
| south        | -0.1722<br>(0.1236)                   |                         |
| west         | -0.1135<br>(0.1354)                   |                         |
| lesshischool | -0.0153<br>(0.1213)                   |                         |
| collegeplus  | 0.2936***<br>(0.1037)                 |                         |
| poor         | 0.1079<br>(0.1570)                    |                         |
| nearpoor     | 0.3025<br>(0.2235)                    |                         |
| middleinc    | 0.0277<br>(0.1330)                    |                         |
| highinc      | 0.1184<br>(0.1426)                    |                         |

|             |                       |                            |
|-------------|-----------------------|----------------------------|
| _bs_1       |                       | 1.2489e+08<br>(9.5384e+08) |
| _bs_2       |                       | 0.0035<br>(0.0268)         |
| _cons       | 5.2827***<br>(0.2116) |                            |
| No. of Obs. | 5848.0000             | 5848.0000                  |
| R-Squared   |                       |                            |

|              | (1)<br>outpatient<br>Coef./std.errors | (2)<br>Coef./std.errors |
|--------------|---------------------------------------|-------------------------|
| main         |                                       |                         |
| overweight   | -0.1027<br>(0.1214)                   |                         |
| obese        | 0.3668***<br>(0.1273)                 |                         |
| unins        | -0.9986***<br>(0.1335)                |                         |
| medicaid     | 0.4431*<br>(0.2318)                   |                         |
| medicare     | 0.6793**<br>(0.3429)                  |                         |
| female       | 0.4223***<br>(0.1016)                 |                         |
| smoker       | 0.1162<br>(0.1289)                    |                         |
| married      | 0.0224<br>(0.1064)                    |                         |
| black        | 0.2923<br>(0.1969)                    |                         |
| amind        | -0.2888<br>(0.2394)                   |                         |
| asian        | 0.5741***<br>(0.1449)                 |                         |
| othrace      | 0.0000<br>(.)                         |                         |
| midwest      | 0.1421<br>(0.1536)                    |                         |
| south        | -0.1137<br>(0.1412)                   |                         |
| west         | 0.0294<br>(0.1512)                    |                         |
| lesshischool | 0.1792<br>(0.1666)                    |                         |
| collegeplus  | 0.3630***<br>(0.1177)                 |                         |
| poor         | -0.4114*<br>(0.2172)                  |                         |
| nearpoor     | -0.0688<br>(0.2989)                   |                         |
| middleinc    | -0.2957*<br>(0.1713)                  |                         |
| highinc      | -0.3230*<br>(0.1732)                  |                         |

|             |                       |                             |
|-------------|-----------------------|-----------------------------|
| _bs_1       |                       | -9.4229e+08<br>(1.3604e+09) |
| _bs_2       |                       | -0.0281<br>(0.0400)         |
| _cons       | 6.0538***<br>(0.2667) |                             |
| No. of Obs. | 3885.0000             | 3885.0000                   |
| R-Squared   |                       |                             |

|              | (1)<br>outpatient<br>Coef./std.errors | (2)<br>Coef./std.errors |
|--------------|---------------------------------------|-------------------------|
| main         |                                       |                         |
| overweight   | 0.2410**<br>(0.0992)                  |                         |
| obese        | 0.3459***<br>(0.1026)                 |                         |
| unins        | -0.6880***<br>(0.1130)                |                         |
| medicaid     | 0.4028*<br>(0.2118)                   |                         |
| medicare     | 0.7299***<br>(0.2166)                 |                         |
| female       | 0.4919***<br>(0.0832)                 |                         |
| smoker       | -0.1525<br>(0.0970)                   |                         |
| married      | -0.1352<br>(0.0909)                   |                         |
| black        | 0.2754<br>(0.1734)                    |                         |
| amind        | -0.2429<br>(0.2489)                   |                         |
| asian        | 0.2545*<br>(0.1365)                   |                         |
| othrace      | 0.0000<br>(.)                         |                         |
| midwest      | 0.0364<br>(0.1269)                    |                         |
| south        | -0.3025***<br>(0.1172)                |                         |
| west         | -0.2172*<br>(0.1273)                  |                         |
| lesshischool | 0.0899<br>(0.1358)                    |                         |
| collegeplus  | 0.3007***<br>(0.0895)                 |                         |
| poor         | 0.1157<br>(0.1960)                    |                         |
| nearpoor     | -0.2806<br>(0.2738)                   |                         |
| middleinc    | 0.0267<br>(0.1528)                    |                         |
| highinc      | 0.1562<br>(0.1518)                    |                         |

|             |           |              |
|-------------|-----------|--------------|
| _bs_1       |           | 3.4394e+09** |
|             |           | (1.6131e+09) |
| _bs_2       |           | 0.0760**     |
|             |           | (0.0349)     |
| _cons       | 6.3855*** |              |
|             | (0.2253)  |              |
| No. of Obs. | 3914.0000 | 3914.0000    |
| R-Squared   |           |              |

|              | (1)<br>outpatient<br>Coef./std.errors | (2)<br>Coef./std.errors |
|--------------|---------------------------------------|-------------------------|
| main         |                                       |                         |
| overweight   | -0.2289**<br>(0.1112)                 |                         |
| obese        | 0.1651<br>(0.1167)                    |                         |
| unins        | -0.5553***<br>(0.1455)                |                         |
| medicaid     | 0.7424***<br>(0.2525)                 |                         |
| medicare     | 0.9900***<br>(0.1889)                 |                         |
| female       | 0.1156<br>(0.0942)                    |                         |
| smoker       | -0.2064*<br>(0.1203)                  |                         |
| married      | -0.0448<br>(0.1048)                   |                         |
| black        | 0.4019*<br>(0.2274)                   |                         |
| amind        | 0.0493<br>(0.2709)                    |                         |
| asian        | 0.7409***<br>(0.1774)                 |                         |
| othrace      | 0.0000<br>(.)                         |                         |
| midwest      | 0.2339*<br>(0.1390)                   |                         |
| south        | 0.2190*<br>(0.1285)                   |                         |
| west         | 0.0263<br>(0.1451)                    |                         |
| lesshischool | -0.1697<br>(0.1516)                   |                         |
| collegeplus  | -0.0301<br>(0.1077)                   |                         |
| poor         | -0.2492<br>(0.2258)                   |                         |
| nearpoor     | -0.3373<br>(0.3019)                   |                         |
| middleinc    | 0.2169<br>(0.1818)                    |                         |
| highinc      | 0.2714<br>(0.1815)                    |                         |

|             |                       |                             |
|-------------|-----------------------|-----------------------------|
| _bs_1       |                       | -4.1878e+09<br>(2.8488e+09) |
| _bs_2       |                       | -0.0740<br>(0.0487)         |
| _cons       | 6.5496***<br>(0.2874) |                             |
| No. of Obs. | 2892.0000             | 2892.0000                   |
| R-Squared   |                       |                             |



|              | (1)<br>outpatient<br>Coef./std.errors | (2)<br>Coef./std.errors     |
|--------------|---------------------------------------|-----------------------------|
| main         |                                       |                             |
| overweight   | -0.0755<br>(0.1208)                   |                             |
| obese        | 0.0432<br>(0.1272)                    |                             |
| female       | -0.1212<br>(0.1025)                   |                             |
| smoker       | -0.3685**<br>(0.1462)                 |                             |
| married      | 0.0991<br>(0.1068)                    |                             |
| black        | -0.1306<br>(0.2609)                   |                             |
| amind        | -0.8884***<br>(0.3162)                |                             |
| asian        | -0.2287<br>(0.2061)                   |                             |
| othrace      | 0.0000<br>(.)                         |                             |
| midwest      | 0.3851**<br>(0.1543)                  |                             |
| south        | 0.1601<br>(0.1359)                    |                             |
| west         | 0.1862<br>(0.1602)                    |                             |
| lesshischool | -0.1978<br>(0.1423)                   |                             |
| collegeplus  | 0.3143***<br>(0.1178)                 |                             |
| poor         | 0.2264<br>(0.2059)                    |                             |
| nearpoor     | 0.3622<br>(0.2287)                    |                             |
| middleinc    | 0.2927*<br>(0.1610)                   |                             |
| highinc      | 0.1678<br>(0.1587)                    |                             |
| _bs_1        |                                       | -1.0200e+09<br>(1.8158e+09) |
| _bs_2        |                                       | -0.0296<br>(0.0523)         |
| _cons        | 7.4022***<br>(0.2872)                 |                             |

---

|             |           |           |
|-------------|-----------|-----------|
| No. of Obs. | 1788.0000 | 1788.0000 |
| R-Squared   |           |           |

---

|              | (1)<br>outpatient<br>Coef./std.errors | (2)<br>Coef./std.errors    |
|--------------|---------------------------------------|----------------------------|
| main         |                                       |                            |
| overweight   | 0.0811<br>(0.0987)                    |                            |
| obese        | 0.4183***<br>(0.1234)                 |                            |
| female       | 0.0520<br>(0.0956)                    |                            |
| smoker       | -0.1391<br>(0.1883)                   |                            |
| married      | 0.1372<br>(0.0962)                    |                            |
| black        | 0.8850***<br>(0.2509)                 |                            |
| amind        | 0.1554<br>(0.3212)                    |                            |
| asian        | 0.4540**<br>(0.1995)                  |                            |
| othrace      | 0.0000<br>(.)                         |                            |
| midwest      | 0.0897<br>(0.1296)                    |                            |
| south        | -0.1830<br>(0.1196)                   |                            |
| west         | -0.3427**<br>(0.1396)                 |                            |
| lesshischool | -0.0646<br>(0.1145)                   |                            |
| collegeplus  | 0.2552**<br>(0.1054)                  |                            |
| poor         | -0.0445<br>(0.1729)                   |                            |
| nearpoor     | 0.1577<br>(0.1831)                    |                            |
| middleinc    | 0.1259<br>(0.1222)                    |                            |
| highinc      | 0.3251**<br>(0.1272)                  |                            |
| _bs_1        |                                       | 9.5047e+08<br>(1.1494e+09) |
| _bs_2        |                                       | 0.0280<br>(0.0334)         |
| _cons        | 6.8784***<br>(0.2669)                 |                            |

---

|             |           |           |
|-------------|-----------|-----------|
| No. of Obs. | 1569.0000 | 1569.0000 |
| R-Squared   |           |           |

---

|              | (1)<br>outpatient<br>Coef./std.errors | (2)<br>Coef./std.errors |
|--------------|---------------------------------------|-------------------------|
| main         |                                       |                         |
| overweight   | 0.0138<br>(0.0514)                    |                         |
| obese        | 0.3065***<br>(0.0552)                 |                         |
| age3544      | 0.2910***<br>(0.0654)                 |                         |
| age4554      | 0.5794***<br>(0.0655)                 |                         |
| age5564      | 1.0383***<br>(0.0698)                 |                         |
| age6574      | 1.0941***<br>(0.0796)                 |                         |
| age75plus    | 1.1276***<br>(0.0819)                 |                         |
| female       | 0.4013***<br>(0.0440)                 |                         |
| smoker       | -0.0517<br>(0.0592)                   |                         |
| married      | 0.0963**<br>(0.0460)                  |                         |
| black        | 0.1853*<br>(0.0986)                   |                         |
| amind        | -0.3514***<br>(0.1254)                |                         |
| asian        | 0.2157***<br>(0.0778)                 |                         |
| othrace      | 0.0000<br>(.)                         |                         |
| midwest      | 0.1591**<br>(0.0656)                  |                         |
| south        | -0.1127*<br>(0.0605)                  |                         |
| west         | -0.0402<br>(0.0674)                   |                         |
| lesshischool | 0.0459<br>(0.0698)                    |                         |
| collegeplus  | 0.1872***<br>(0.0505)                 |                         |
| poor         | 0.1253<br>(0.1019)                    |                         |
| nearpoor     | 0.0567<br>(0.1316)                    |                         |

|             |                       |                            |
|-------------|-----------------------|----------------------------|
| middleinc   | -0.0501<br>(0.0770)   |                            |
| highinc     | -0.0897<br>(0.0762)   |                            |
| _bs_1       |                       | 9.7423e+08<br>(3.8834e+09) |
| _bs_2       |                       | 0.0043<br>(0.0173)         |
| _cons       | 5.9813***<br>(0.1255) |                            |
| No. of Obs. | 15175.0000            | 15175.0000                 |
| R-Squared   |                       |                            |

|              | (1)<br>outpatient<br>Coef./std.errors | (2)<br>Coef./std.errors |
|--------------|---------------------------------------|-------------------------|
| main         |                                       |                         |
| overweight   | 0.0369<br>(0.0619)                    |                         |
| obese        | 0.3229***<br>(0.0678)                 |                         |
| age3544      | 0.3062***<br>(0.0756)                 |                         |
| age4554      | 0.5864***<br>(0.0761)                 |                         |
| age5564      | 1.0427***<br>(0.0814)                 |                         |
| age6574      | 1.2126***<br>(0.1100)                 |                         |
| age75plus    | 1.2876***<br>(0.1181)                 |                         |
| female       | 0.5003***<br>(0.0529)                 |                         |
| smoker       | -0.1231*<br>(0.0716)                  |                         |
| married      | 0.1249**<br>(0.0551)                  |                         |
| black        | 0.0671<br>(0.1263)                    |                         |
| amind        | -0.2324<br>(0.1523)                   |                         |
| asian        | 0.2979***<br>(0.0973)                 |                         |
| othrace      | 0.0000<br>(.)                         |                         |
| midwest      | 0.1819**<br>(0.0782)                  |                         |
| south        | -0.0945<br>(0.0734)                   |                         |
| west         | 0.0073<br>(0.0818)                    |                         |
| lesshischool | 0.0226<br>(0.0944)                    |                         |
| collegeplus  | 0.1566***<br>(0.0607)                 |                         |
| poor         | -0.0452<br>(0.1657)                   |                         |
| nearpoor     | 0.0479<br>(0.2058)                    |                         |

|             |                       |                            |
|-------------|-----------------------|----------------------------|
| middleinc   | -0.0508<br>(0.1004)   |                            |
| highinc     | -0.0993<br>(0.0979)   |                            |
| _bs_1       |                       | 2.0531e+09<br>(3.4717e+09) |
| _bs_2       |                       | 0.0118<br>(0.0199)         |
| _cons       | 5.8228***<br>(0.1581) |                            |
| No. of Obs. | 11061.0000            | 11061.0000                 |
| R-Squared   |                       |                            |



|              | (1)<br>outpatient<br>Coef./std.errors | (2)<br>Coef./std.errors |
|--------------|---------------------------------------|-------------------------|
| main         |                                       |                         |
| overweight   | -0.1732<br>(0.1582)                   |                         |
| obese        | 0.0840<br>(0.1535)                    |                         |
| age3544      | 0.5268***<br>(0.1876)                 |                         |
| age4554      | 0.7082***<br>(0.1890)                 |                         |
| age5564      | 0.8239***<br>(0.2134)                 |                         |
| age6574      | 0.9152***<br>(0.2322)                 |                         |
| age75plus    | 0.7858***<br>(0.2364)                 |                         |
| female       | 0.2670*<br>(0.1372)                   |                         |
| smoker       | 0.1531<br>(0.1457)                    |                         |
| married      | 0.1104<br>(0.1512)                    |                         |
| black        | 0.4116**<br>(0.2007)                  |                         |
| amind        | -1.2003***<br>(0.3286)                |                         |
| asian        | -0.0105<br>(0.1758)                   |                         |
| othrace      | 0.0000<br>(.)                         |                         |
| midwest      | 0.2457<br>(0.1941)                    |                         |
| south        | -0.1839<br>(0.1747)                   |                         |
| west         | -0.0131<br>(0.1845)                   |                         |
| lesshischool | -0.0184<br>(0.1497)                   |                         |
| collegeplus  | 0.1157<br>(0.1718)                    |                         |
| poor         | -0.2468<br>(0.1828)                   |                         |
| nearpoor     | -0.0964<br>(0.2321)                   |                         |

|             |                       |                             |
|-------------|-----------------------|-----------------------------|
| middleinc   | -0.0524<br>(0.2140)   |                             |
| highinc     | -0.3333<br>(0.3398)   |                             |
| _bs_1       |                       | -1.0218e+09<br>(9.5424e+08) |
| _bs_2       |                       | -0.0470<br>(0.0427)         |
| _cons       | 6.6930***<br>(0.2967) |                             |
| No. of Obs. | 2245.0000             | 2245.0000                   |
| R-Squared   |                       |                             |

|              | (1)<br>outpatient<br>Coef./std.errors | (2)<br>Coef./std.errors |
|--------------|---------------------------------------|-------------------------|
| main         |                                       |                         |
| overweight   | 0.0302<br>(0.0765)                    |                         |
| obese        | 0.2597***<br>(0.0840)                 |                         |
| age3544      | 0.6736*<br>(0.3753)                   |                         |
| age4554      | 0.8218**<br>(0.3465)                  |                         |
| age5564      | 1.1770***<br>(0.3366)                 |                         |
| age6574      | 0.5185<br>(0.3153)                    |                         |
| age75plus    | 0.6486**<br>(0.3159)                  |                         |
| female       | -0.0409<br>(0.0678)                   |                         |
| smoker       | -0.2658***<br>(0.1028)                |                         |
| married      | 0.1387**<br>(0.0700)                  |                         |
| black        | 0.2236<br>(0.1716)                    |                         |
| amind        | -0.5215**<br>(0.2288)                 |                         |
| asian        | -0.1077<br>(0.1397)                   |                         |
| othrace      | 0.0000<br>(.)                         |                         |
| midwest      | 0.2064**<br>(0.0989)                  |                         |
| south        | -0.0507<br>(0.0891)                   |                         |
| west         | -0.0262<br>(0.1065)                   |                         |
| lesshischool | -0.1136<br>(0.0868)                   |                         |
| collegeplus  | 0.2711***<br>(0.0763)                 |                         |
| poor         | 0.1231<br>(0.1223)                    |                         |
| nearpoor     | 0.2382*<br>(0.1389)                   |                         |

|             |                       |                            |
|-------------|-----------------------|----------------------------|
| middleinc   | 0.2183**<br>(0.0964)  |                            |
| highinc     | 0.2574***<br>(0.0979) |                            |
| _bs_1       |                       | 8.3431e+08<br>(2.1026e+09) |
| _bs_2       |                       | 0.0102<br>(0.0259)         |
| _cons       | 6.7451***<br>(0.3587) |                            |
| No. of Obs. | 3861.0000             | 3861.0000                  |
| R-Squared   |                       |                            |

|              | (1)<br>totalexp<br>Coef./std.errors | (2)<br>Coef./std.errors |
|--------------|-------------------------------------|-------------------------|
| main         |                                     |                         |
| overweight   | 0.0204<br>(0.1061)                  |                         |
| obese        | 0.1951<br>(0.1228)                  |                         |
| unins        | -0.8434***<br>(0.1164)              |                         |
| medicaid     | 0.4269**<br>(0.1913)                |                         |
| medicare     | 0.6232<br>(0.5753)                  |                         |
| female       | 1.0096***<br>(0.0973)               |                         |
| smoker       | 0.1437<br>(0.1199)                  |                         |
| married      | 0.2498**<br>(0.1027)                |                         |
| black        | 0.0538<br>(0.1722)                  |                         |
| amind        | -0.2361<br>(0.2478)                 |                         |
| asian        | 0.4107***<br>(0.1325)               |                         |
| othrace      | 0.0000<br>(.)                       |                         |
| midwest      | -0.0612<br>(0.1470)                 |                         |
| south        | -0.1024<br>(0.1365)                 |                         |
| west         | -0.2088<br>(0.1502)                 |                         |
| lesshischool | -0.0119<br>(0.1351)                 |                         |
| collegeplus  | -0.0885<br>(0.1164)                 |                         |
| poor         | 0.2753<br>(0.1754)                  |                         |
| nearpoor     | 0.4046<br>(0.2505)                  |                         |
| middleinc    | -0.0789<br>(0.1462)                 |                         |
| highinc      | 0.0699<br>(0.1523)                  |                         |

|             |                       |                            |
|-------------|-----------------------|----------------------------|
| _bs_1       |                       | 4.9464e+08<br>(2.4561e+09) |
| _bs_2       |                       | 0.0052<br>(0.0255)         |
| _cons       | 6.4661***<br>(0.2287) |                            |
| No. of Obs. | 5848.0000             | 5848.0000                  |
| R-Squared   |                       |                            |

|              | (1)                    | (2)              |
|--------------|------------------------|------------------|
|              | totalexp               |                  |
|              | Coef./std.errors       | Coef./std.errors |
| main         |                        |                  |
| overweight   | -0.0652<br>(0.1092)    |                  |
| obese        | 0.4905***<br>(0.1150)  |                  |
| unins        | -0.9031***<br>(0.1195) |                  |
| medicaid     | 0.6286***<br>(0.2090)  |                  |
| medicare     | 1.0692***<br>(0.3111)  |                  |
| female       | 0.3313***<br>(0.0901)  |                  |
| smoker       | 0.2213*<br>(0.1173)    |                  |
| married      | 0.0062<br>(0.0974)     |                  |
| black        | 0.4106**<br>(0.1782)   |                  |
| amind        | 0.2468<br>(0.2258)     |                  |
| asian        | 0.5006***<br>(0.1335)  |                  |
| othrace      | 0.0000<br>(.)          |                  |
| midwest      | 0.1265<br>(0.1407)     |                  |
| south        | -0.1090<br>(0.1285)    |                  |
| west         | 0.0233<br>(0.1370)     |                  |
| lesshischool | 0.1363<br>(0.1493)     |                  |
| collegeplus  | 0.3816***<br>(0.1085)  |                  |
| poor         | -0.2008<br>(0.1948)    |                  |
| nearpoor     | 0.2493<br>(0.2660)     |                  |
| middleinc    | -0.2557*<br>(0.1509)   |                  |
| highinc      | -0.1699<br>(0.1541)    |                  |

|             |                       |                             |
|-------------|-----------------------|-----------------------------|
| _bs_1       |                       | -1.3907e+09<br>(2.7265e+09) |
| _bs_2       |                       | -0.0168<br>(0.0328)         |
| _cons       | 6.7818***<br>(0.2380) |                             |
| No. of Obs. | 3885.0000             | 3885.0000                   |
| R-Squared   |                       |                             |



|              | (1)<br>totalexp<br>Coef./std.errors | (2)<br>Coef./std.errors |
|--------------|-------------------------------------|-------------------------|
| main         |                                     |                         |
| overweight   | 0.2736***<br>(0.0978)               |                         |
| obese        | 0.4029***<br>(0.1004)               |                         |
| unins        | -0.4409***<br>(0.1143)              |                         |
| medicaid     | 0.8227***<br>(0.2011)               |                         |
| medicare     | 1.2996***<br>(0.2083)               |                         |
| female       | 0.3170***<br>(0.0802)               |                         |
| smoker       | -0.1883**<br>(0.0951)               |                         |
| married      | 0.0048<br>(0.0897)                  |                         |
| black        | 0.4908***<br>(0.1718)               |                         |
| amind        | -0.3147<br>(0.2454)                 |                         |
| asian        | 0.5055***<br>(0.1334)               |                         |
| othrace      | 0.0000<br>(.)                       |                         |
| midwest      | -0.0125<br>(0.1239)                 |                         |
| south        | -0.1594<br>(0.1157)                 |                         |
| west         | -0.1043<br>(0.1235)                 |                         |
| lesshischool | 0.0488<br>(0.1324)                  |                         |
| collegeplus  | 0.1263<br>(0.0887)                  |                         |
| poor         | 0.3230*<br>(0.1910)                 |                         |
| nearpoor     | -0.1076<br>(0.2660)                 |                         |
| middleinc    | -0.0738<br>(0.1506)                 |                         |
| highinc      | -0.0281<br>(0.1494)                 |                         |

|             |                       |                               |
|-------------|-----------------------|-------------------------------|
| _bs_1       |                       | 1.0950e+10***<br>(3.9940e+09) |
| _bs_2       |                       | 0.0840***<br>(0.0302)         |
| _cons       | 7.1876***<br>(0.2230) |                               |
| No. of Obs. | 3914.0000             | 3914.0000                     |
| R-Squared   |                       |                               |

|              | (1)<br>totalexp<br>Coef./std.errors | (2)<br>Coef./std.errors |
|--------------|-------------------------------------|-------------------------|
| main         |                                     |                         |
| overweight   | 0.0466<br>(0.1011)                  |                         |
| obese        | 0.4555***<br>(0.1048)               |                         |
| unins        | -0.4590***<br>(0.1314)              |                         |
| medicaid     | 0.6807***<br>(0.2220)               |                         |
| medicare     | 0.8395***<br>(0.1676)               |                         |
| female       | 0.0140<br>(0.0847)                  |                         |
| smoker       | -0.0650<br>(0.1079)                 |                         |
| married      | -0.0331<br>(0.0932)                 |                         |
| black        | 0.5263***<br>(0.1977)               |                         |
| amind        | 0.0307<br>(0.2448)                  |                         |
| asian        | 0.5825***<br>(0.1589)               |                         |
| othrace      | 0.0000<br>(.)                       |                         |
| midwest      | 0.2383*<br>(0.1273)                 |                         |
| south        | 0.2901**<br>(0.1155)                |                         |
| west         | 0.1142<br>(0.1316)                  |                         |
| lesshischool | -0.0198<br>(0.1328)                 |                         |
| collegeplus  | -0.1009<br>(0.0973)                 |                         |
| poor         | 0.2319<br>(0.2017)                  |                         |
| nearpoor     | 0.4341<br>(0.2767)                  |                         |
| middleinc    | 0.4838***<br>(0.1634)               |                         |
| highinc      | 0.3803**<br>(0.1643)                |                         |

|             |                       |                            |
|-------------|-----------------------|----------------------------|
| _bs_1       |                       | 2.0933e+09<br>(5.6080e+09) |
| _bs_2       |                       | 0.0140<br>(0.0370)         |
| _cons       | 7.2520***<br>(0.2502) |                            |
| No. of Obs. | 2892.0000             | 2892.0000                  |
| R-Squared   |                       |                            |

|              | (1)<br>totalexp<br>Coef./std.errors | (2)<br>Coef./std.errors     |
|--------------|-------------------------------------|-----------------------------|
| main         |                                     |                             |
| overweight   | -0.0473<br>(0.1254)                 |                             |
| obese        | 0.2849**<br>(0.1307)                |                             |
| female       | -0.0561<br>(0.1069)                 |                             |
| smoker       | -0.0497<br>(0.1487)                 |                             |
| married      | 0.1208<br>(0.1126)                  |                             |
| black        | -0.0729<br>(0.2560)                 |                             |
| amind        | 0.2613<br>(0.3338)                  |                             |
| asian        | -0.0936<br>(0.2021)                 |                             |
| othrace      | 0.0000<br>(.)                       |                             |
| midwest      | 0.1737<br>(0.1571)                  |                             |
| south        | 0.1125<br>(0.1391)                  |                             |
| west         | 0.1414<br>(0.1663)                  |                             |
| lesshischool | -0.0983<br>(0.1434)                 |                             |
| collegeplus  | 0.0649<br>(0.1220)                  |                             |
| poor         | 0.3367<br>(0.2113)                  |                             |
| nearpoor     | 0.4192*<br>(0.2313)                 |                             |
| middleinc    | 0.0154<br>(0.1632)                  |                             |
| highinc      | -0.0253<br>(0.1647)                 |                             |
| _bs_1        |                                     | -1.7994e+09<br>(4.6066e+09) |
| _bs_2        |                                     | -0.0165<br>(0.0423)         |
| _cons        | 8.5477***<br>(0.2932)               |                             |

---

|             |           |           |
|-------------|-----------|-----------|
| No. of Obs. | 1788.0000 | 1788.0000 |
| R-Squared   |           |           |

---

|              | (1)<br>totalexp<br>Coef./std.errors | (2)<br>Coef./std.errors     |
|--------------|-------------------------------------|-----------------------------|
| main         |                                     |                             |
| overweight   | -0.0792<br>(0.0941)                 |                             |
| obese        | 0.1280<br>(0.1198)                  |                             |
| female       | 0.0238<br>(0.0951)                  |                             |
| smoker       | 0.0647<br>(0.1860)                  |                             |
| married      | -0.0816<br>(0.0934)                 |                             |
| black        | 0.3679<br>(0.2431)                  |                             |
| amind        | 0.2020<br>(0.3113)                  |                             |
| asian        | 0.2700<br>(0.1911)                  |                             |
| othrace      | 0.0000<br>(.)                       |                             |
| midwest      | -0.1310<br>(0.1262)                 |                             |
| south        | 0.1188<br>(0.1177)                  |                             |
| west         | -0.4036***<br>(0.1381)              |                             |
| lesshischool | 0.0919<br>(0.1141)                  |                             |
| collegeplus  | -0.0797<br>(0.1030)                 |                             |
| poor         | -0.0712<br>(0.1664)                 |                             |
| nearpoor     | 0.1591<br>(0.1750)                  |                             |
| middleinc    | -0.0038<br>(0.1203)                 |                             |
| highinc      | 0.1991<br>(0.1266)                  |                             |
| _bs_1        |                                     | -3.4151e+09<br>(4.4073e+09) |
| _bs_2        |                                     | -0.0284<br>(0.0365)         |
| _cons        | 8.6934***<br>(0.2599)               |                             |

---

|             |           |           |
|-------------|-----------|-----------|
| No. of Obs. | 1569.0000 | 1569.0000 |
| R-Squared   |           |           |

---



|              | (1)                   | (2)              |
|--------------|-----------------------|------------------|
|              | totalexp              |                  |
|              | Coef./std.errors      | Coef./std.errors |
| main         |                       |                  |
| overweight   | 0.0437<br>(0.0515)    |                  |
| obese        | 0.3912***<br>(0.0555) |                  |
| age3544      | 0.2313***<br>(0.0661) |                  |
| age4554      | 0.6339***<br>(0.0664) |                  |
| age5564      | 1.0313***<br>(0.0708) |                  |
| age6574      | 1.2251***<br>(0.0801) |                  |
| age75plus    | 1.4062***<br>(0.0825) |                  |
| female       | 0.3588***<br>(0.0444) |                  |
| smoker       | -0.0141<br>(0.0599)   |                  |
| married      | 0.0980**<br>(0.0464)  |                  |
| black        | 0.1814*<br>(0.0990)   |                  |
| amind        | -0.0161<br>(0.1264)   |                  |
| asian        | 0.2357***<br>(0.0776) |                  |
| othrace      | 0.0000<br>(.)         |                  |
| midwest      | 0.0947<br>(0.0658)    |                  |
| south        | 0.0122<br>(0.0609)    |                  |
| west         | -0.0515<br>(0.0676)   |                  |
| lesshischool | 0.1138<br>(0.0697)    |                  |
| collegeplus  | 0.0402<br>(0.0513)    |                  |
| poor         | 0.3350***<br>(0.1019) |                  |
| nearpoor     | 0.3041**<br>(0.1315)  |                  |

|             |                       |                            |
|-------------|-----------------------|----------------------------|
| middleinc   | -0.1079<br>(0.0769)   |                            |
| highinc     | -0.1510**<br>(0.0762) |                            |
| _bs_1       |                       | 8.7160e+09<br>(1.0735e+10) |
| _bs_2       |                       | 0.0135<br>(0.0167)         |
| _cons       | 6.9718***<br>(0.1230) |                            |
| No. of Obs. | 15175.0000            | 15175.0000                 |
| R-Squared   |                       |                            |

|              | (1)<br>totalexp<br>Coef./std.errors | (2)<br>Coef./std.errors |
|--------------|-------------------------------------|-------------------------|
| main         |                                     |                         |
| overweight   | 0.0715<br>(0.0635)                  |                         |
| obese        | 0.4105***<br>(0.0693)               |                         |
| age3544      | 0.2066***<br>(0.0781)               |                         |
| age4554      | 0.5940***<br>(0.0790)               |                         |
| age5564      | 1.0117***<br>(0.0843)               |                         |
| age6574      | 1.3429***<br>(0.1133)               |                         |
| age75plus    | 1.5228***<br>(0.1210)               |                         |
| female       | 0.4655***<br>(0.0548)               |                         |
| smoker       | -0.1295*<br>(0.0739)                |                         |
| married      | 0.1774***<br>(0.0565)               |                         |
| black        | 0.1548<br>(0.1292)                  |                         |
| amind        | 0.1423<br>(0.1568)                  |                         |
| asian        | 0.3374***<br>(0.0991)               |                         |
| othrace      | 0.0000<br>(.)                       |                         |
| midwest      | 0.1083<br>(0.0801)                  |                         |
| south        | -0.0122<br>(0.0753)                 |                         |
| west         | -0.0616<br>(0.0835)                 |                         |
| lesshischool | 0.0662<br>(0.0960)                  |                         |
| collegeplus  | 0.0395<br>(0.0629)                  |                         |
| poor         | 0.0677<br>(0.1683)                  |                         |
| nearpoor     | 0.1552<br>(0.2074)                  |                         |

|             |                       |                            |
|-------------|-----------------------|----------------------------|
| middleinc   | -0.0577<br>(0.1022)   |                            |
| highinc     | -0.0999<br>(0.1004)   |                            |
| _bs_1       |                       | 1.0300e+10<br>(9.4759e+09) |
| _bs_2       |                       | 0.0225<br>(0.0206)         |
| _cons       | 6.7254***<br>(0.1568) |                            |
| No. of Obs. | 11061.0000            | 11061.0000                 |
| R-Squared   |                       |                            |

|              | (1)<br>totalexp<br>Coef./std.errors | (2)<br>Coef./std.errors |
|--------------|-------------------------------------|-------------------------|
| main         |                                     |                         |
| overweight   | -0.0094<br>(0.1098)                 |                         |
| obese        | 0.3012***<br>(0.1064)               |                         |
| age3544      | 0.4635***<br>(0.1293)               |                         |
| age4554      | 1.0192***<br>(0.1355)               |                         |
| age5564      | 1.0542***<br>(0.1555)               |                         |
| age6574      | 1.0825***<br>(0.1596)               |                         |
| age75plus    | 0.9112***<br>(0.1694)               |                         |
| female       | -0.0296<br>(0.0994)                 |                         |
| smoker       | 0.1052<br>(0.1034)                  |                         |
| married      | -0.1654<br>(0.1076)                 |                         |
| black        | 0.2258<br>(0.1466)                  |                         |
| amind        | -0.8830***<br>(0.2382)              |                         |
| asian        | 0.1188<br>(0.1253)                  |                         |
| othrace      | 0.0000<br>(.)                       |                         |
| midwest      | 0.2749**<br>(0.1373)                |                         |
| south        | -0.0420<br>(0.1253)                 |                         |
| west         | 0.1612<br>(0.1264)                  |                         |
| lesshischool | 0.0023<br>(0.1036)                  |                         |
| collegeplus  | 0.0635<br>(0.1217)                  |                         |
| poor         | 0.1436<br>(0.1255)                  |                         |
| nearpoor     | 0.3095*<br>(0.1620)                 |                         |

|             |                       |                             |
|-------------|-----------------------|-----------------------------|
| middleinc   | 0.1170<br>(0.1466)    |                             |
| highinc     | 0.1277<br>(0.2411)    |                             |
| _bs_1       |                       | -1.9692e+08<br>(2.6372e+09) |
| _bs_2       |                       | -0.0024<br>(0.0323)         |
| _cons       | 7.6531***<br>(0.2081) |                             |
| No. of Obs. | 2245.0000             | 2245.0000                   |
| R-Squared   |                       |                             |

|              | (1)<br>totalexp<br>Coef./std.errors | (2)<br>Coef./std.errors |
|--------------|-------------------------------------|-------------------------|
| main         |                                     |                         |
| overweight   | -0.0657<br>(0.0770)                 |                         |
| obese        | 0.2678***<br>(0.0860)               |                         |
| age3544      | 0.7813**<br>(0.3779)                |                         |
| age4554      | 1.0993***<br>(0.3495)               |                         |
| age5564      | 1.0644***<br>(0.3381)               |                         |
| age6574      | 0.5049<br>(0.3162)                  |                         |
| age75plus    | 0.7377**<br>(0.3184)                |                         |
| female       | -0.0300<br>(0.0690)                 |                         |
| smoker       | -0.0258<br>(0.1034)                 |                         |
| married      | 0.0504<br>(0.0722)                  |                         |
| black        | 0.0461<br>(0.1697)                  |                         |
| amind        | 0.1830<br>(0.2333)                  |                         |
| asian        | -0.0180<br>(0.1376)                 |                         |
| othrace      | 0.0000<br>(.)                       |                         |
| midwest      | 0.0293<br>(0.0993)                  |                         |
| south        | 0.1050<br>(0.0899)                  |                         |
| west         | -0.0513<br>(0.1080)                 |                         |
| lesshischool | 0.0082<br>(0.0875)                  |                         |
| collegeplus  | -0.0242<br>(0.0777)                 |                         |
| poor         | 0.0955<br>(0.1218)                  |                         |
| nearpoor     | 0.3156**<br>(0.1392)                |                         |

|             |                       |                             |
|-------------|-----------------------|-----------------------------|
| middleinc   | 0.0080<br>(0.0970)    |                             |
| highinc     | 0.1428<br>(0.1001)    |                             |
| _bs_1       |                       | -5.9508e+09<br>(6.4686e+09) |
| _bs_2       |                       | -0.0213<br>(0.0231)         |
| _cons       | 8.0851***<br>(0.3548) |                             |
| No. of Obs. | 3861.0000             | 3861.0000                   |
| R-Squared   |                       |                             |
