# Supplementary material for: Changes in healthcare spending attributable to obesity and overweight: payer- and service-specific estimates
Source: Springer Nature journal article supplement (doi:10.1186/s12889-022-13176-y), 2022-05-13
Supplement: MOESM2 [file 20400074]

|              | (1)<br>inpatient<br>Coef./std.errors | (2)<br>Coef./std.errors |
|--------------|--------------------------------------|-------------------------|
| main         |                                      |                         |
| overweight   | 0.1641<br>(0.1379)                   |                         |
| obese        | -0.0135<br>(0.1392)                  |                         |
| unins        | -0.3306*<br>(0.1872)                 |                         |
| medicaid     | 0.7268***<br>(0.1631)                |                         |
| medicare     | 0.8981**<br>(0.3834)                 |                         |
| female       | 1.8191***<br>(0.1684)                |                         |
| smoker       | -0.2829*<br>(0.1713)                 |                         |
| married      | 0.8744***<br>(0.1253)                |                         |
| black        | -0.0551<br>(0.1453)                  |                         |
| amind        | 0.2683<br>(0.6320)                   |                         |
| asian        | -0.0949<br>(0.2289)                  |                         |
| othrace      | -0.2193<br>(0.3167)                  |                         |
| midwest      | 0.4168**<br>(0.1860)                 |                         |
| south        | 0.2065<br>(0.1740)                   |                         |
| west         | -0.1580<br>(0.1884)                  |                         |
| lesshischool | -0.2667<br>(0.1627)                  |                         |
| collegeplus  | -0.0151<br>(0.1367)                  |                         |
| poor         | 0.6960***<br>(0.1700)                |                         |
| nearpoor     | -0.1683<br>(0.2726)                  |                         |
| middleinc    | -0.4233**<br>(0.1951)                |                         |
| highinc      | -0.3488*<br>(0.2119)                 |                         |

|              |                              |                             |
|--------------|------------------------------|-----------------------------|
| _bs_1        |                              | -3.3249e+09<br>(3.1876e+09) |
| _bs_2        |                              | -0.0827<br>(0.0761)         |
| _cons        | -4.6144***<br>(0.2913)       |                             |
| <hr/>        |                              |                             |
| glm          |                              |                             |
| overweight   | -391.4874<br>(2524.5990)     |                             |
| obese        | -3358.2167<br>(2533.5858)    |                             |
| unins        | 1931.0648<br>(3625.6758)     |                             |
| medicaid     | 1607.1043<br>(3152.5995)     |                             |
| medicare     | 21549.7469***<br>(6663.6651) |                             |
| female       | -5219.2791<br>(3401.5068)    |                             |
| smoker       | 2368.8328<br>(3120.0699)     |                             |
| married      | -901.9378<br>(2531.5460)     |                             |
| black        | 441.7747<br>(2627.8251)      |                             |
| amind        | 5765.9183<br>(11542.6336)    |                             |
| asian        | -3482.0310<br>(4323.7412)    |                             |
| othrace      | -5882.7376<br>(5903.7918)    |                             |
| midwest      | -5889.2289*<br>(3416.7197)   |                             |
| south        | -4642.4160<br>(3244.0177)    |                             |
| west         | -3858.1026<br>(3509.7962)    |                             |
| lesshischool | -37.1351<br>(2969.2443)      |                             |
| collegeplus  | 276.7460<br>(2570.1213)      |                             |
| poor         | 709.9060<br>(3143.0255)      |                             |
| nearpoor     | -3908.1159<br>(5096.1782)    |                             |
| middleinc    | 6912.1575*                   |                             |

|             |               |           |
|-------------|---------------|-----------|
|             | (3827.9773)   |           |
| highinc     | 7555.6833*    |           |
|             | (4192.9226)   |           |
| _cons       | 17466.0135*** |           |
|             | (5442.5835)   |           |
| <hr/>       |               |           |
| No. of Obs. | 6003.0000     | 6003.0000 |
| R-Squared   |               |           |
| <hr/>       |               |           |

|              | (1)<br>inpatient<br>Coef./std.errors | (2)<br>Coef./std.errors |
|--------------|--------------------------------------|-------------------------|
| main         |                                      |                         |
| overweight   | 0.0523<br>(0.1960)                   |                         |
| obese        | 0.0448<br>(0.1901)                   |                         |
| unins        | 0.0726<br>(0.2308)                   |                         |
| medicaid     | 0.6261***<br>(0.2323)                |                         |
| medicare     | 1.5392***<br>(0.2890)                |                         |
| female       | 0.5248***<br>(0.1648)                |                         |
| smoker       | 0.2435<br>(0.2005)                   |                         |
| married      | 0.1666<br>(0.1642)                   |                         |
| black        | -0.4966**<br>(0.2200)                |                         |
| amind        | -1.4320<br>(1.0599)                  |                         |
| asian        | -0.3752<br>(0.3087)                  |                         |
| othrace      | -0.1529<br>(0.4434)                  |                         |
| midwest      | 0.2615<br>(0.2898)                   |                         |
| south        | 0.5799**<br>(0.2601)                 |                         |
| west         | 0.2975<br>(0.2697)                   |                         |
| lesshischool | -0.2281<br>(0.2305)                  |                         |
| collegeplus  | 0.2896<br>(0.1873)                   |                         |
| poor         | 0.6695**<br>(0.2702)                 |                         |
| nearpoor     | 0.7161**<br>(0.3385)                 |                         |
| middleinc    | 0.3556<br>(0.2672)                   |                         |
| highinc      | 0.2496<br>(0.2901)                   |                         |

|              |                             |                             |
|--------------|-----------------------------|-----------------------------|
| _bs_1        |                             | -8.7395e+08<br>(2.9600e+09) |
| _bs_2        |                             | -0.0282<br>(0.0946)         |
| _cons        | -4.2975***<br>(0.4278)      |                             |
| <hr/>        |                             |                             |
| glm          |                             |                             |
| overweight   | 578.7015<br>(3890.3042)     |                             |
| obese        | -1989.1176<br>(3692.2765)   |                             |
| unins        | -1275.3493<br>(4573.8666)   |                             |
| medicaid     | -2468.7091<br>(4192.3252)   |                             |
| medicare     | 10631.9424**<br>(4999.7143) |                             |
| female       | -2207.3203<br>(3150.0022)   |                             |
| smoker       | 216.6305<br>(3988.6425)     |                             |
| married      | -5147.8491<br>(3293.0477)   |                             |
| black        | -5535.2884<br>(4235.2011)   |                             |
| amind        | -10658.6154<br>(20481.2934) |                             |
| asian        | -2678.8126<br>(6044.3735)   |                             |
| othrace      | -7442.5942<br>(8399.9883)   |                             |
| midwest      | 1521.1412<br>(5545.9762)    |                             |
| south        | 1449.9104<br>(5000.6107)    |                             |
| west         | 3346.0409<br>(5234.3123)    |                             |
| lesshischool | -1416.5722<br>(4435.0461)   |                             |
| collegeplus  | 3045.3533<br>(3385.5266)    |                             |
| poor         | 1112.5433<br>(5421.9261)    |                             |
| nearpoor     | -3361.2569<br>(6538.1343)   |                             |
| middleinc    | 6532.3915                   |                             |

|             |              |           |
|-------------|--------------|-----------|
|             | (5364.3070)  |           |
| highinc     | 2936.1370    |           |
|             | (5691.7229)  |           |
| _cons       | 16511.2452** |           |
|             | (8357.8918)  |           |
| <hr/>       |              |           |
| No. of Obs. | 3609.0000    | 3609.0000 |
| R-Squared   |              |           |
| <hr/>       |              |           |

|              | (1)<br>inpatient<br>Coef./std.errors | (2)<br>Coef./std.errors |
|--------------|--------------------------------------|-------------------------|
| main         |                                      |                         |
| overweight   | 0.0522<br>(0.2112)                   |                         |
| obese        | 0.3003<br>(0.1998)                   |                         |
| unins        | -0.6464**<br>(0.2659)                |                         |
| medicaid     | 0.3322<br>(0.2148)                   |                         |
| medicare     | 0.8786***<br>(0.2342)                |                         |
| female       | 0.6101***<br>(0.1640)                |                         |
| smoker       | -0.0067<br>(0.1950)                  |                         |
| married      | -0.2846*<br>(0.1689)                 |                         |
| black        | -0.2158<br>(0.1941)                  |                         |
| amind        | -0.1869<br>(1.0339)                  |                         |
| asian        | -0.1634<br>(0.3457)                  |                         |
| othrace      | 0.4212<br>(0.4012)                   |                         |
| midwest      | 0.0462<br>(0.2385)                   |                         |
| south        | 0.0376<br>(0.2124)                   |                         |
| west         | -0.5042**<br>(0.2497)                |                         |
| lesshischool | 0.0202<br>(0.2121)                   |                         |
| collegeplus  | -0.1514<br>(0.1790)                  |                         |
| poor         | 0.0784<br>(0.2455)                   |                         |
| nearpoor     | -0.1851<br>(0.3669)                  |                         |
| middleinc    | -0.1369<br>(0.2330)                  |                         |
| highinc      | -0.3621<br>(0.2546)                  |                         |

|              |                              |                              |
|--------------|------------------------------|------------------------------|
| _bs_1        |                              | 9.8614e+09**<br>(4.6238e+09) |
| _bs_2        |                              | 0.2407**<br>(0.1078)         |
| _cons        | -2.9520***<br>(0.3543)       |                              |
| <hr/>        |                              |                              |
| glm          |                              |                              |
| overweight   | 4868.5274<br>(6524.1937)     |                              |
| obese        | 7743.7505<br>(6061.3125)     |                              |
| unins        | -11227.4818<br>(8299.8400)   |                              |
| medicaid     | -15236.3739**<br>(6404.5958) |                              |
| medicare     | 106.4320<br>(6659.1093)      |                              |
| female       | -5160.8221<br>(5039.5647)    |                              |
| smoker       | 519.2615<br>(5905.8152)      |                              |
| married      | -9827.0313*<br>(5327.8644)   |                              |
| black        | 4233.5092<br>(5943.8592)     |                              |
| amind        | -12994.2335<br>(32287.2769)  |                              |
| asian        | -4513.6362<br>(10794.1328)   |                              |
| othrace      | 18859.8587<br>(11929.1323)   |                              |
| midwest      | -9075.0166<br>(7286.1500)    |                              |
| south        | -6648.4172<br>(6483.7964)    |                              |
| west         | 2149.0765<br>(7882.4216)     |                              |
| lesshischool | 4070.8278<br>(6695.5717)     |                              |
| collegeplus  | 11846.6911**<br>(5467.1531)  |                              |
| poor         | -137.6396<br>(7362.0981)     |                              |
| nearpoor     | -8036.6157<br>(11148.5031)   |                              |
| middleinc    | -3762.0850                   |                              |



|             |               |           |
|-------------|---------------|-----------|
|             | (7169.3835)   |           |
| highinc     | -2846.4830    |           |
|             | (7936.5028)   |           |
| _cons       | 29805.3393*** |           |
|             | (10415.3659)  |           |
| <hr/>       |               |           |
| No. of Obs. | 3652.0000     | 3652.0000 |
| R-Squared   |               |           |
| <hr/>       |               |           |

|              | (1)<br>inpatient<br>Coef./std.errors | (2)<br>Coef./std.errors |
|--------------|--------------------------------------|-------------------------|
| main         |                                      |                         |
| overweight   | -0.2625<br>(0.1801)                  |                         |
| obese        | 0.1002<br>(0.1689)                   |                         |
| unins        | -0.2196<br>(0.2580)                  |                         |
| medicaid     | 0.6957***<br>(0.1807)                |                         |
| medicare     | 1.0369***<br>(0.1621)                |                         |
| female       | -0.0047<br>(0.1388)                  |                         |
| smoker       | 0.2747*<br>(0.1644)                  |                         |
| married      | -0.0899<br>(0.1508)                  |                         |
| black        | 0.1655<br>(0.1605)                   |                         |
| amind        | -0.8512<br>(1.0344)                  |                         |
| asian        | -0.1806<br>(0.3487)                  |                         |
| othrace      | 0.2422<br>(0.3797)                   |                         |
| midwest      | 0.1179<br>(0.2090)                   |                         |
| south        | -0.0881<br>(0.1940)                  |                         |
| west         | -0.1945<br>(0.2165)                  |                         |
| lesshischool | -0.0283<br>(0.1899)                  |                         |
| collegeplus  | 0.2870*<br>(0.1578)                  |                         |
| poor         | 0.1536<br>(0.2105)                   |                         |
| nearpoor     | -0.2876<br>(0.3326)                  |                         |
| middleinc    | -0.1616<br>(0.2152)                  |                         |
| highinc      | -0.3351<br>(0.2324)                  |                         |

|              |                              |                             |
|--------------|------------------------------|-----------------------------|
| _bs_1        |                              | -3.3248e+09<br>(6.8714e+09) |
| _bs_2        |                              | -0.0508<br>(0.1035)         |
| _cons        | -2.7485***<br>(0.3164)       |                             |
| <hr/>        |                              |                             |
| glm          |                              |                             |
| overweight   | -1107.0723<br>(4717.6241)    |                             |
| obese        | -5744.6907<br>(4330.7822)    |                             |
| unins        | 142.8105<br>(6895.8863)      |                             |
| medicaid     | -8121.8299*<br>(4530.6711)   |                             |
| medicare     | -6427.7576<br>(4045.4466)    |                             |
| female       | 2298.1761<br>(3595.2751)     |                             |
| smoker       | -456.3687<br>(4380.6724)     |                             |
| married      | 8154.2401*<br>(4185.1934)    |                             |
| black        | 212.4645<br>(4022.3443)      |                             |
| amind        | -17440.4036<br>(27878.0165)  |                             |
| asian        | -18642.0964**<br>(9232.0893) |                             |
| othrace      | -714.9842<br>(9618.1798)     |                             |
| midwest      | -5583.9283<br>(5439.0387)    |                             |
| south        | -6472.1873<br>(5030.5630)    |                             |
| west         | -427.9161<br>(5685.6240)     |                             |
| lesshischool | 3739.6139<br>(4940.1871)     |                             |
| collegeplus  | 4451.8055<br>(4151.6124)     |                             |
| poor         | -142.5480<br>(5333.8136)     |                             |
| nearpoor     | -7427.6623<br>(8664.3927)    |                             |
| middleinc    | -27.1970                     |                             |

|             |               |           |
|-------------|---------------|-----------|
|             | (5492.0452)   |           |
| highinc     | -3606.8024    |           |
|             | (6104.6425)   |           |
| _cons       | 30683.5370*** |           |
|             | (8389.7270)   |           |
| <hr/>       |               |           |
| No. of Obs. | 3353.0000     | 3353.0000 |
| R-Squared   |               |           |
| <hr/>       |               |           |

|              | (1)<br>inpatient<br>Coef./std.errors | (2)<br>Coef./std.errors    |
|--------------|--------------------------------------|----------------------------|
| main         |                                      |                            |
| overweight   | 0.2030<br>(0.1703)                   |                            |
| obese        | 0.2306<br>(0.1714)                   |                            |
| female       | 0.0625<br>(0.1360)                   |                            |
| smoker       | 0.4135**<br>(0.1845)                 |                            |
| married      | -0.3582**<br>(0.1437)                |                            |
| black        | -0.0297<br>(0.1748)                  |                            |
| amind        | 0.6083<br>(0.6573)                   |                            |
| asian        | -0.2935<br>(0.3212)                  |                            |
| othrace      | -0.3379<br>(0.4804)                  |                            |
| midwest      | 0.1274<br>(0.2186)                   |                            |
| south        | 0.1298<br>(0.1960)                   |                            |
| west         | -0.3049<br>(0.2271)                  |                            |
| lesshischool | 0.0608<br>(0.1939)                   |                            |
| collegeplus  | 0.2686*<br>(0.1628)                  |                            |
| poor         | -0.2934<br>(0.2428)                  |                            |
| nearpoor     | 0.3434<br>(0.2887)                   |                            |
| middleinc    | -0.2061<br>(0.2032)                  |                            |
| highinc      | -0.3228<br>(0.2098)                  |                            |
| _bs_1        |                                      | 4.5793e+09<br>(4.1329e+09) |
| _bs_2        |                                      | 0.0810<br>(0.0717)         |
| _cons        | -2.0278***<br>(0.2964)               |                            |

---

|              |                              |           |
|--------------|------------------------------|-----------|
| glm          |                              |           |
| overweight   | 2853.8682<br>(3552.3007)     |           |
| obese        | 887.3801<br>(3452.4311)      |           |
| female       | -239.7047<br>(2770.3067)     |           |
| smoker       | -4025.5523<br>(3752.5214)    |           |
| married      | -467.9081<br>(2946.9202)     |           |
| black        | -1519.1410<br>(3404.4166)    |           |
| amind        | 1985.6599<br>(12734.4758)    |           |
| asian        | 5357.7238<br>(6600.0997)     |           |
| othrace      | 7049.1023<br>(9924.3713)     |           |
| midwest      | -546.6661<br>(4507.5557)     |           |
| south        | 77.5321<br>(4019.0285)       |           |
| west         | 2705.7450<br>(4835.2789)     |           |
| lesshischool | -1198.5243<br>(3907.8267)    |           |
| collegeplus  | -6176.0909*<br>(3293.5594)   |           |
| poor         | 5528.8371<br>(4904.4178)     |           |
| nearpoor     | 2292.1699<br>(5560.5696)     |           |
| middleinc    | 8258.2232**<br>(4113.3533)   |           |
| highinc      | 5861.1050<br>(4303.4706)     |           |
| _cons        | 16411.2265***<br>(5865.3895) |           |
| No. of Obs.  | 2309.0000                    | 2309.0000 |
| R-Squared    |                              |           |

---

|              | (1)<br>inpatient<br>Coef./std.errors | (2)<br>Coef./std.errors      |
|--------------|--------------------------------------|------------------------------|
| main         |                                      |                              |
| overweight   | 0.1718<br>(0.1627)                   |                              |
| obese        | 0.4618***<br>(0.1758)                |                              |
| female       | -0.0996<br>(0.1479)                  |                              |
| smoker       | -0.2770<br>(0.4153)                  |                              |
| married      | -0.2069<br>(0.1534)                  |                              |
| black        | -0.1052<br>(0.1999)                  |                              |
| amind        | 0.6259<br>(0.6935)                   |                              |
| asian        | -1.3503***<br>(0.4735)               |                              |
| othrace      | -0.3491<br>(0.7619)                  |                              |
| midwest      | -0.0528<br>(0.2170)                  |                              |
| south        | 0.0084<br>(0.1889)                   |                              |
| west         | 0.1205<br>(0.2111)                   |                              |
| lesshischool | 0.0578<br>(0.1770)                   |                              |
| collegeplus  | -0.3439**<br>(0.1672)                |                              |
| poor         | 0.0323<br>(0.2272)                   |                              |
| nearpoor     | 0.2964<br>(0.3009)                   |                              |
| middleinc    | 0.2612<br>(0.2010)                   |                              |
| highinc      | 0.1550<br>(0.2168)                   |                              |
| _bs_1        |                                      | 7.0336e+09**<br>(2.9982e+09) |
| _bs_2        |                                      | 0.1460**<br>(0.0609)         |
| _cons        | -1.6675***<br>(0.2752)               |                              |

---

|              |                              |           |
|--------------|------------------------------|-----------|
| glm          |                              |           |
| overweight   | 1000.0608<br>(3052.5234)     |           |
| obese        | 3556.7138<br>(3301.1689)     |           |
| female       | -3886.7867<br>(2791.7741)    |           |
| smoker       | -3819.6966<br>(8029.9174)    |           |
| married      | -1059.6734<br>(3002.4022)    |           |
| black        | -1180.2407<br>(3735.1474)    |           |
| amind        | -15863.6516<br>(12125.8145)  |           |
| asian        | -8807.9483<br>(9423.6021)    |           |
| othrace      | -6890.7714<br>(14774.8247)   |           |
| midwest      | -1398.6981<br>(4046.3570)    |           |
| south        | -2155.0455<br>(3549.7179)    |           |
| west         | 5405.6448<br>(3938.2869)     |           |
| lesshischool | 5673.2746*<br>(3302.2334)    |           |
| collegeplus  | 3974.9115<br>(3163.1743)     |           |
| poor         | -2483.8784<br>(4274.1909)    |           |
| nearpoor     | -2065.3277<br>(5561.7259)    |           |
| middleinc    | -3304.0186<br>(3922.6660)    |           |
| highinc      | -2042.2455<br>(4050.4232)    |           |
| _cons        | 17602.1801***<br>(5577.9757) |           |
| No. of Obs.  | 1640.0000                    | 1640.0000 |
| R-Squared    |                              |           |

---



|              | (1)<br>inpatient<br>Coef./std.errors | (2)<br>Coef./std.errors |
|--------------|--------------------------------------|-------------------------|
| main         |                                      |                         |
| overweight   | 0.0464<br>(0.0718)                   |                         |
| obese        | 0.2066***<br>(0.0708)                |                         |
| age3544      | -0.1680<br>(0.1030)                  |                         |
| age4554      | -0.1363<br>(0.1001)                  |                         |
| age5564      | 0.2197**<br>(0.0919)                 |                         |
| age6574      | 0.6304***<br>(0.0901)                |                         |
| age75plus    | 0.9587***<br>(0.0921)                |                         |
| female       | 0.4871***<br>(0.0604)                |                         |
| smoker       | 0.2139***<br>(0.0802)                |                         |
| married      | 0.0390<br>(0.0625)                   |                         |
| black        | -0.0356<br>(0.0734)                  |                         |
| amind        | 0.0187<br>(0.3414)                   |                         |
| asian        | -0.4037***<br>(0.1320)               |                         |
| othrace      | -0.0558<br>(0.1753)                  |                         |
| midwest      | 0.1424<br>(0.0904)                   |                         |
| south        | 0.0507<br>(0.0818)                   |                         |
| west         | -0.1719*<br>(0.0915)                 |                         |
| lesshischool | -0.0384<br>(0.0806)                  |                         |
| collegeplus  | 0.0159<br>(0.0670)                   |                         |
| poor         | 0.4383***<br>(0.0913)                |                         |
| nearpoor     | 0.1568<br>(0.1335)                   |                         |

|              |                              |                             |
|--------------|------------------------------|-----------------------------|
| middleinc    | -0.2145**<br>(0.0891)        |                             |
| highinc      | -0.4137***<br>(0.0934)       |                             |
| _bs_1        |                              | 1.7026e+10*<br>(9.2021e+09) |
| _bs_2        |                              | 0.0625*<br>(0.0338)         |
| _cons        | -2.9328***<br>(0.1321)       |                             |
| <hr/>        |                              |                             |
| glm          |                              |                             |
| overweight   | 1288.5776<br>(1600.6419)     |                             |
| obese        | 176.0602<br>(1557.4357)      |                             |
| age3544      | 3567.7275<br>(2335.3043)     |                             |
| age4554      | 9775.5514***<br>(2254.9131)  |                             |
| age5564      | 11178.4394***<br>(2077.5825) |                             |
| age6574      | 5315.5822***<br>(2050.5221)  |                             |
| age75plus    | 2940.4923<br>(2077.9635)     |                             |
| female       | -2078.6191<br>(1395.0294)    |                             |
| smoker       | -768.7965<br>(1811.2373)     |                             |
| married      | -822.3417<br>(1417.6979)     |                             |
| black        | 74.3313<br>(1602.6946)       |                             |
| amind        | -3053.4765<br>(7447.2250)    |                             |
| asian        | -4012.1297<br>(3002.9835)    |                             |
| othrace      | 3178.4434<br>(3900.4726)     |                             |
| midwest      | -4655.1744**<br>(1990.8601)  |                             |
| south        | -3191.5948*<br>(1809.1519)   |                             |
| west         | 532.5519<br>(2034.2688)      |                             |
| lesshischool | 2640.4250                    |                             |

|             |               |            |
|-------------|---------------|------------|
|             | (1764.2357)   |            |
| collegeplus | 2523.8087*    |            |
|             | (1487.1015)   |            |
| poor        | -1323.0905    |            |
|             | (2016.9226)   |            |
| nearpoor    | -3542.9993    |            |
|             | (2919.8651)   |            |
| middleinc   | 3048.0068     |            |
|             | (1986.3387)   |            |
| highinc     | 2729.1593     |            |
|             | (2090.4483)   |            |
| _cons       | 14146.5026*** |            |
|             | (3053.8433)   |            |
| <hr/>       |               |            |
| No. of Obs. | 17196.0000    | 17196.0000 |
| R-Squared   |               |            |
| <hr/>       |               |            |

|              | (1)<br>inpatient<br>Coef./std.errors | (2)<br>Coef./std.errors |
|--------------|--------------------------------------|-------------------------|
| main         |                                      |                         |
| overweight   | 0.0205<br>(0.1052)                   |                         |
| obese        | 0.3035***<br>(0.1043)                |                         |
| age3544      | -0.1575<br>(0.1399)                  |                         |
| age4554      | -0.1674<br>(0.1381)                  |                         |
| age5564      | 0.0910<br>(0.1335)                   |                         |
| age6574      | 0.6653***<br>(0.1443)                |                         |
| age75plus    | 1.3147***<br>(0.1432)                |                         |
| female       | 0.5888***<br>(0.0873)                |                         |
| smoker       | 0.0279<br>(0.1434)                   |                         |
| married      | 0.3459***<br>(0.0918)                |                         |
| black        | -0.0590<br>(0.1202)                  |                         |
| amind        | 0.4310<br>(0.5286)                   |                         |
| asian        | -0.0856<br>(0.1605)                  |                         |
| othrace      | 0.0156<br>(0.2571)                   |                         |
| midwest      | -0.0353<br>(0.1327)                  |                         |
| south        | -0.0236<br>(0.1228)                  |                         |
| west         | -0.2072<br>(0.1361)                  |                         |
| lesshischool | -0.0083<br>(0.1520)                  |                         |
| collegeplus  | 0.0666<br>(0.0969)                   |                         |
| poor         | 0.1930<br>(0.1944)                   |                         |
| nearpoor     | 0.0858<br>(0.2749)                   |                         |

|              |                              |                             |
|--------------|------------------------------|-----------------------------|
| middleinc    | -0.1220<br>(0.1364)          |                             |
| highinc      | -0.2741**<br>(0.1373)        |                             |
| _bs_1        |                              | 1.4972e+10*<br>(7.7396e+09) |
| _bs_2        |                              | 0.0879**<br>(0.0446)        |
| _cons        | -3.4249***<br>(0.2070)       |                             |
| <hr/>        |                              |                             |
| glm          |                              |                             |
| overweight   | 752.3977<br>(2515.2907)      |                             |
| obese        | 32.0338<br>(2499.7390)       |                             |
| age3544      | 4765.7158<br>(3369.0131)     |                             |
| age4554      | 15240.7460***<br>(3305.8907) |                             |
| age5564      | 18602.8074***<br>(3231.4261) |                             |
| age6574      | 5434.0670<br>(3482.4903)     |                             |
| age75plus    | 3144.7592<br>(3425.9951)     |                             |
| female       | -3276.5865<br>(2160.5240)    |                             |
| smoker       | 2526.2321<br>(3466.1274)     |                             |
| married      | -2219.4602<br>(2244.6451)    |                             |
| black        | -2170.8368<br>(2879.5370)    |                             |
| amind        | -7950.3296<br>(12428.9529)   |                             |
| asian        | -4808.7685<br>(3880.9894)    |                             |
| othrace      | 1219.0099<br>(6230.6698)     |                             |
| midwest      | -5566.5183*<br>(3155.1495)   |                             |
| south        | -5677.3015*<br>(2929.0091)   |                             |
| west         | 476.2371<br>(3236.2827)      |                             |
| lesshischool | 5763.7376                    |                             |

|             |               |            |
|-------------|---------------|------------|
|             | (3588.4235)   |            |
| collegeplus | 5294.5318**   |            |
|             | (2326.1911)   |            |
| poor        | 678.8772      |            |
|             | (4581.5360)   |            |
| nearpoor    | -4220.5826    |            |
|             | (6468.7403)   |            |
| middleinc   | 391.8166      |            |
|             | (3257.5235)   |            |
| highinc     | -1241.9206    |            |
|             | (3285.3796)   |            |
| _cons       | 17485.2045*** |            |
|             | (5339.0021)   |            |
| <hr/>       |               |            |
| No. of Obs. | 11222.0000    | 11222.0000 |
| R-Squared   |               |            |
| <hr/>       |               |            |

|              | (1)<br>inpatient<br>Coef./std.errors | (2)<br>Coef./std.errors |
|--------------|--------------------------------------|-------------------------|
| main         |                                      |                         |
| overweight   | -0.0184<br>(0.1256)                  |                         |
| obese        | -0.0335<br>(0.1210)                  |                         |
| age3544      | -0.2660<br>(0.1640)                  |                         |
| age4554      | -0.1371<br>(0.1624)                  |                         |
| age5564      | 0.3728***<br>(0.1433)                |                         |
| age6574      | 0.6648***<br>(0.1688)                |                         |
| age75plus    | 0.7066***<br>(0.1799)                |                         |
| female       | 0.6100***<br>(0.1141)                |                         |
| smoker       | 0.0871<br>(0.1185)                   |                         |
| married      | -0.0743<br>(0.1234)                  |                         |
| black        | -0.1222<br>(0.1132)                  |                         |
| amind        | -1.4525<br>(1.0248)                  |                         |
| asian        | -0.8137***<br>(0.2679)               |                         |
| othrace      | -0.1693<br>(0.2795)                  |                         |
| midwest      | 0.3883**<br>(0.1508)                 |                         |
| south        | 0.3190**<br>(0.1355)                 |                         |
| west         | -0.3399**<br>(0.1473)                |                         |
| lesshischool | -0.0845<br>(0.1171)                  |                         |
| collegeplus  | 0.1001<br>(0.1271)                   |                         |
| poor         | 0.2252*<br>(0.1299)                  |                         |
| nearpoor     | -0.0924<br>(0.1893)                  |                         |

|              |                            |                             |
|--------------|----------------------------|-----------------------------|
| middleinc    | -0.1271<br>(0.1722)        |                             |
| highinc      | -0.3030<br>(0.3063)        |                             |
| _bs_1        |                            | -4.7837e+08<br>(3.3271e+09) |
| _bs_2        |                            | -0.0091<br>(0.0628)         |
| _cons        | -2.4546***<br>(0.2029)     |                             |
| <hr/>        |                            |                             |
| glm          |                            |                             |
| overweight   | 4630.8584<br>(2824.0484)   |                             |
| obese        | 5.1181<br>(2712.1932)      |                             |
| age3544      | 2915.6094<br>(3807.0962)   |                             |
| age4554      | 2385.4156<br>(3727.2299)   |                             |
| age5564      | 4938.5405<br>(3301.8311)   |                             |
| age6574      | 5023.4514<br>(3891.6128)   |                             |
| age75plus    | 3814.0517<br>(4037.7097)   |                             |
| female       | -1198.7510<br>(2705.7152)  |                             |
| smoker       | 1480.4665<br>(2724.1426)   |                             |
| married      | -2180.0988<br>(2758.9566)  |                             |
| black        | -205.8441<br>(2511.8396)   |                             |
| amind        | -4927.1294<br>(24398.4671) |                             |
| asian        | -2474.9894<br>(6218.5735)  |                             |
| othrace      | -495.9784<br>(6275.8189)   |                             |
| midwest      | -5631.2814*<br>(3390.2672) |                             |
| south        | -1853.6195<br>(3018.7275)  |                             |
| west         | -1711.0233<br>(3365.4281)  |                             |
| lesshischool | 883.7690                   |                             |



|             |               |           |
|-------------|---------------|-----------|
|             | (2631.1152)   |           |
| collegeplus | -876.3627     |           |
|             | (2820.7116)   |           |
| poor        | -1334.0044    |           |
|             | (2910.3403)   |           |
| nearpoor    | -3354.3068    |           |
|             | (4249.2817)   |           |
| middleinc   | 8086.3213**   |           |
|             | (3960.1160)   |           |
| highinc     | 13141.6291*   |           |
|             | (7013.4594)   |           |
| _cons       | 13817.9197*** |           |
|             | (4758.5488)   |           |
| <hr/>       |               |           |
| No. of Obs. | 3772.0000     | 3772.0000 |
| R-Squared   |               |           |
| <hr/>       |               |           |

|              | (1)<br>inpatient<br>Coef./std.errors | (2)<br>Coef./std.errors |
|--------------|--------------------------------------|-------------------------|
| main         |                                      |                         |
| overweight   | 0.1154<br>(0.1072)                   |                         |
| obese        | 0.1906*<br>(0.1097)                  |                         |
| age3544      | 0.5315<br>(0.4299)                   |                         |
| age4554      | 0.1224<br>(0.3980)                   |                         |
| age5564      | 0.4034<br>(0.3673)                   |                         |
| age6574      | -0.0857<br>(0.3556)                  |                         |
| age75plus    | 0.2430<br>(0.3569)                   |                         |
| female       | 0.0748<br>(0.0888)                   |                         |
| smoker       | 0.3317***<br>(0.1267)                |                         |
| married      | -0.2437***<br>(0.0945)               |                         |
| black        | -0.0542<br>(0.1125)                  |                         |
| amind        | -0.0417<br>(0.4556)                  |                         |
| asian        | -0.4978**<br>(0.2399)                |                         |
| othrace      | -0.1877<br>(0.2972)                  |                         |
| midwest      | 0.0716<br>(0.1361)                   |                         |
| south        | 0.0515<br>(0.1208)                   |                         |
| west         | -0.1478<br>(0.1409)                  |                         |
| lesshischool | 0.1113<br>(0.1149)                   |                         |
| collegeplus  | 0.0763<br>(0.1019)                   |                         |
| poor         | -0.0352<br>(0.1340)                  |                         |
| nearpoor     | 0.0589<br>(0.1841)                   |                         |

|              |                              |                             |
|--------------|------------------------------|-----------------------------|
| middleinc    | -0.0351<br>(0.1262)          |                             |
| highinc      | -0.1779<br>(0.1371)          |                             |
| _bs_1        |                              | 1.0289e+10*<br>(5.7031e+09) |
| _bs_2        |                              | 0.0804*<br>(0.0434)         |
| _cons        | -1.9117***<br>(0.3852)       |                             |
| <hr/>        |                              |                             |
| glm          |                              |                             |
| overweight   | 3223.6035<br>(2225.1562)     |                             |
| obese        | 1665.7601<br>(2237.0545)     |                             |
| age3544      | -5800.7395<br>(8698.5269)    |                             |
| age4554      | -7530.8476<br>(8171.1207)    |                             |
| age5564      | -12364.0650<br>(7577.4995)   |                             |
| age6574      | -12639.1432*<br>(7437.9768)  |                             |
| age75plus    | -14970.0130**<br>(7489.7610) |                             |
| female       | -880.3699<br>(1839.3067)     |                             |
| smoker       | -511.3810<br>(2623.5606)     |                             |
| married      | -1299.9772<br>(1978.3760)    |                             |
| black        | 657.6487<br>(2271.9367)      |                             |
| amind        | -5626.6795<br>(9289.1570)    |                             |
| asian        | 671.9345<br>(5131.0400)      |                             |
| othrace      | 5114.3179<br>(6186.2085)     |                             |
| midwest      | -379.5060<br>(2797.6047)     |                             |
| south        | 1917.2964<br>(2472.6081)     |                             |
| west         | 5601.5573*<br>(2935.3715)    |                             |
| lesshischool | 3127.9792                    |                             |

|             |               |           |
|-------------|---------------|-----------|
|             | (2353.7386)   |           |
| collegeplus | 979.6703      |           |
|             | (2099.9814)   |           |
| poor        | 609.7110      |           |
|             | (2725.0952)   |           |
| nearpoor    | -2125.6033    |           |
|             | (3722.2059)   |           |
| middleinc   | 3187.9857     |           |
|             | (2614.5068)   |           |
| highinc     | 2323.4910     |           |
|             | (2823.3175)   |           |
| _cons       | 26154.6249*** |           |
|             | (8178.8433)   |           |
| <hr/>       |               |           |
| No. of Obs. | 4547.0000     | 4547.0000 |
| R-Squared   |               |           |
| <hr/>       |               |           |

|              | (1)<br>inpatient<br>Coef./std.errors | (2)<br>Coef./std.errors |
|--------------|--------------------------------------|-------------------------|
| main         |                                      |                         |
| overweight   | 0.1641<br>(0.1379)                   |                         |
| obese        | -0.0135<br>(0.1392)                  |                         |
| unins        | -0.3306*<br>(0.1872)                 |                         |
| medicaid     | 0.7268***<br>(0.1631)                |                         |
| medicare     | 0.8981**<br>(0.3834)                 |                         |
| female       | 1.8191***<br>(0.1684)                |                         |
| smoker       | -0.2829*<br>(0.1713)                 |                         |
| married      | 0.8744***<br>(0.1253)                |                         |
| black        | -0.0551<br>(0.1453)                  |                         |
| amind        | 0.2683<br>(0.6320)                   |                         |
| asian        | -0.0949<br>(0.2289)                  |                         |
| othrace      | -0.2193<br>(0.3167)                  |                         |
| midwest      | 0.4168**<br>(0.1860)                 |                         |
| south        | 0.2065<br>(0.1740)                   |                         |
| west         | -0.1580<br>(0.1884)                  |                         |
| lesshischool | -0.2667<br>(0.1627)                  |                         |
| collegeplus  | -0.0151<br>(0.1367)                  |                         |
| poor         | 0.6960***<br>(0.1700)                |                         |
| nearpoor     | -0.1683<br>(0.2726)                  |                         |
| middleinc    | -0.4233**<br>(0.1951)                |                         |
| highinc      | -0.3488*<br>(0.2119)                 |                         |

|              |               |              |
|--------------|---------------|--------------|
| _bs_1        |               | 1.3628e+09   |
|              |               | (2.6367e+09) |
| _bs_2        |               | 0.0339       |
|              |               | (0.0658)     |
| _cons        | -4.6144***    |              |
|              | (0.2913)      |              |
| <hr/>        |               |              |
| glm          |               |              |
| overweight   | -391.4874     |              |
|              | (2524.5990)   |              |
| obese        | -3358.2167    |              |
|              | (2533.5858)   |              |
| unins        | 1931.0648     |              |
|              | (3625.6758)   |              |
| medicaid     | 1607.1043     |              |
|              | (3152.5995)   |              |
| medicare     | 21549.7469*** |              |
|              | (6663.6651)   |              |
| female       | -5219.2791    |              |
|              | (3401.5068)   |              |
| smoker       | 2368.8328     |              |
|              | (3120.0699)   |              |
| married      | -901.9378     |              |
|              | (2531.5460)   |              |
| black        | 441.7747      |              |
|              | (2627.8251)   |              |
| amind        | 5765.9183     |              |
|              | (11542.6336)  |              |
| asian        | -3482.0310    |              |
|              | (4323.7412)   |              |
| othrace      | -5882.7376    |              |
|              | (5903.7918)   |              |
| midwest      | -5889.2289*   |              |
|              | (3416.7197)   |              |
| south        | -4642.4160    |              |
|              | (3244.0177)   |              |
| west         | -3858.1026    |              |
|              | (3509.7962)   |              |
| lesshischool | -37.1351      |              |
|              | (2969.2443)   |              |
| collegeplus  | 276.7460      |              |
|              | (2570.1213)   |              |
| poor         | 709.9060      |              |
|              | (3143.0255)   |              |
| nearpoor     | -3908.1159    |              |
|              | (5096.1782)   |              |
| middleinc    | 6912.1575*    |              |

|             |               |           |
|-------------|---------------|-----------|
|             | (3827.9773)   |           |
| highinc     | 7555.6833*    |           |
|             | (4192.9226)   |           |
| _cons       | 17466.0135*** |           |
|             | (5442.5835)   |           |
| <hr/>       |               |           |
| No. of Obs. | 6003.0000     | 6003.0000 |
| R-Squared   |               |           |
| <hr/>       |               |           |

|              | (1)<br>inpatient<br>Coef./std.errors | (2)<br>Coef./std.errors |
|--------------|--------------------------------------|-------------------------|
| main         |                                      |                         |
| overweight   | 0.0523<br>(0.1960)                   |                         |
| obese        | 0.0448<br>(0.1901)                   |                         |
| unins        | 0.0726<br>(0.2308)                   |                         |
| medicaid     | 0.6261***<br>(0.2323)                |                         |
| medicare     | 1.5392***<br>(0.2890)                |                         |
| female       | 0.5248***<br>(0.1648)                |                         |
| smoker       | 0.2435<br>(0.2005)                   |                         |
| married      | 0.1666<br>(0.1642)                   |                         |
| black        | -0.4966**<br>(0.2200)                |                         |
| amind        | -1.4320<br>(1.0599)                  |                         |
| asian        | -0.3752<br>(0.3087)                  |                         |
| othrace      | -0.1529<br>(0.4434)                  |                         |
| midwest      | 0.2615<br>(0.2898)                   |                         |
| south        | 0.5799**<br>(0.2601)                 |                         |
| west         | 0.2975<br>(0.2697)                   |                         |
| lesshischool | -0.2281<br>(0.2305)                  |                         |
| collegeplus  | 0.2896<br>(0.1873)                   |                         |
| poor         | 0.6695**<br>(0.2702)                 |                         |
| nearpoor     | 0.7161**<br>(0.3385)                 |                         |
| middleinc    | 0.3556<br>(0.2672)                   |                         |
| highinc      | 0.2496<br>(0.2901)                   |                         |



|              |              |              |
|--------------|--------------|--------------|
| _bs_1        |              | 7.5258e+08   |
|              |              | (2.6338e+09) |
| _bs_2        |              | 0.0243       |
|              |              | (0.0857)     |
| _cons        | -4.2975***   |              |
|              | (0.4278)     |              |
| <hr/>        |              |              |
| glm          |              |              |
| overweight   | 578.7015     |              |
|              | (3890.3042)  |              |
| obese        | -1989.1176   |              |
|              | (3692.2765)  |              |
| unins        | -1275.3493   |              |
|              | (4573.8666)  |              |
| medicaid     | -2468.7091   |              |
|              | (4192.3252)  |              |
| medicare     | 10631.9424** |              |
|              | (4999.7143)  |              |
| female       | -2207.3203   |              |
|              | (3150.0022)  |              |
| smoker       | 216.6305     |              |
|              | (3988.6425)  |              |
| married      | -5147.8491   |              |
|              | (3293.0477)  |              |
| black        | -5535.2884   |              |
|              | (4235.2011)  |              |
| amind        | -10658.6154  |              |
|              | (20481.2934) |              |
| asian        | -2678.8126   |              |
|              | (6044.3735)  |              |
| othrace      | -7442.5942   |              |
|              | (8399.9883)  |              |
| midwest      | 1521.1412    |              |
|              | (5545.9762)  |              |
| south        | 1449.9104    |              |
|              | (5000.6107)  |              |
| west         | 3346.0409    |              |
|              | (5234.3123)  |              |
| lesshischool | -1416.5722   |              |
|              | (4435.0461)  |              |
| collegeplus  | 3045.3533    |              |
|              | (3385.5266)  |              |
| poor         | 1112.5433    |              |
|              | (5421.9261)  |              |
| nearpoor     | -3361.2569   |              |
|              | (6538.1343)  |              |
| middleinc    | 6532.3915    |              |

|             |              |           |
|-------------|--------------|-----------|
|             | (5364.3070)  |           |
| highinc     | 2936.1370    |           |
|             | (5691.7229)  |           |
| _cons       | 16511.2452** |           |
|             | (8357.8918)  |           |
| <hr/>       |              |           |
| No. of Obs. | 3609.0000    | 3609.0000 |
| R-Squared   |              |           |
| <hr/>       |              |           |

|              | (1)<br>inpatient<br>Coef./std.errors | (2)<br>Coef./std.errors |
|--------------|--------------------------------------|-------------------------|
| main         |                                      |                         |
| overweight   | 0.0522<br>(0.2112)                   |                         |
| obese        | 0.3003<br>(0.1998)                   |                         |
| unins        | -0.6464**<br>(0.2659)                |                         |
| medicaid     | 0.3322<br>(0.2148)                   |                         |
| medicare     | 0.8786***<br>(0.2342)                |                         |
| female       | 0.6101***<br>(0.1640)                |                         |
| smoker       | -0.0067<br>(0.1950)                  |                         |
| married      | -0.2846*<br>(0.1689)                 |                         |
| black        | -0.2158<br>(0.1941)                  |                         |
| amind        | -0.1869<br>(1.0339)                  |                         |
| asian        | -0.1634<br>(0.3457)                  |                         |
| othrace      | 0.4212<br>(0.4012)                   |                         |
| midwest      | 0.0462<br>(0.2385)                   |                         |
| south        | 0.0376<br>(0.2124)                   |                         |
| west         | -0.5042**<br>(0.2497)                |                         |
| lesshischool | 0.0202<br>(0.2121)                   |                         |
| collegeplus  | -0.1514<br>(0.1790)                  |                         |
| poor         | 0.0784<br>(0.2455)                   |                         |
| nearpoor     | -0.1851<br>(0.3669)                  |                         |
| middleinc    | -0.1369<br>(0.2330)                  |                         |
| highinc      | -0.3621<br>(0.2546)                  |                         |

|              |               |              |
|--------------|---------------|--------------|
| _bs_1        |               | 3.0935e+09   |
|              |               | (4.1870e+09) |
| _bs_2        |               | 0.0755       |
|              |               | (0.0986)     |
| _cons        | -2.9520***    |              |
|              | (0.3543)      |              |
| <hr/>        |               |              |
| glm          |               |              |
| overweight   | 4868.5274     |              |
|              | (6524.1937)   |              |
| obese        | 7743.7505     |              |
|              | (6061.3125)   |              |
| unins        | -11227.4818   |              |
|              | (8299.8400)   |              |
| medicaid     | -15236.3739** |              |
|              | (6404.5958)   |              |
| medicare     | 106.4320      |              |
|              | (6659.1093)   |              |
| female       | -5160.8221    |              |
|              | (5039.5647)   |              |
| smoker       | 519.2615      |              |
|              | (5905.8152)   |              |
| married      | -9827.0313*   |              |
|              | (5327.8644)   |              |
| black        | 4233.5092     |              |
|              | (5943.8592)   |              |
| amind        | -12994.2335   |              |
|              | (32287.2769)  |              |
| asian        | -4513.6362    |              |
|              | (10794.1328)  |              |
| othrace      | 18859.8587    |              |
|              | (11929.1323)  |              |
| midwest      | -9075.0166    |              |
|              | (7286.1500)   |              |
| south        | -6648.4172    |              |
|              | (6483.7964)   |              |
| west         | 2149.0765     |              |
|              | (7882.4216)   |              |
| lesshischool | 4070.8278     |              |
|              | (6695.5717)   |              |
| collegeplus  | 11846.6911**  |              |
|              | (5467.1531)   |              |
| poor         | -137.6396     |              |
|              | (7362.0981)   |              |
| nearpoor     | -8036.6157    |              |
|              | (11148.5031)  |              |
| middleinc    | -3762.0850    |              |

|             |               |           |
|-------------|---------------|-----------|
|             | (7169.3835)   |           |
| highinc     | -2846.4830    |           |
|             | (7936.5028)   |           |
| _cons       | 29805.3393*** |           |
|             | (10415.3659)  |           |
| <hr/>       |               |           |
| No. of Obs. | 3652.0000     | 3652.0000 |
| R-Squared   |               |           |
| <hr/>       |               |           |

|              | (1)<br>inpatient<br>Coef./std.errors | (2)<br>Coef./std.errors |
|--------------|--------------------------------------|-------------------------|
| main         |                                      |                         |
| overweight   | -0.2625<br>(0.1801)                  |                         |
| obese        | 0.1002<br>(0.1689)                   |                         |
| unins        | -0.2196<br>(0.2580)                  |                         |
| medicaid     | 0.6957***<br>(0.1807)                |                         |
| medicare     | 1.0369***<br>(0.1621)                |                         |
| female       | -0.0047<br>(0.1388)                  |                         |
| smoker       | 0.2747*<br>(0.1644)                  |                         |
| married      | -0.0899<br>(0.1508)                  |                         |
| black        | 0.1655<br>(0.1605)                   |                         |
| amind        | -0.8512<br>(1.0344)                  |                         |
| asian        | -0.1806<br>(0.3487)                  |                         |
| othrace      | 0.2422<br>(0.3797)                   |                         |
| midwest      | 0.1179<br>(0.2090)                   |                         |
| south        | -0.0881<br>(0.1940)                  |                         |
| west         | -0.1945<br>(0.2165)                  |                         |
| lesshischool | -0.0283<br>(0.1899)                  |                         |
| collegeplus  | 0.2870*<br>(0.1578)                  |                         |
| poor         | 0.1536<br>(0.2105)                   |                         |
| nearpoor     | -0.2876<br>(0.3326)                  |                         |
| middleinc    | -0.1616<br>(0.2152)                  |                         |
| highinc      | -0.3351<br>(0.2324)                  |                         |

|              |                              |                             |
|--------------|------------------------------|-----------------------------|
| _bs_1        |                              | -6.6452e+09<br>(6.7000e+09) |
| _bs_2        |                              | -0.1016<br>(0.0966)         |
| _cons        | -2.7485***<br>(0.3164)       |                             |
| <hr/>        |                              |                             |
| glm          |                              |                             |
| overweight   | -1107.0723<br>(4717.6241)    |                             |
| obese        | -5744.6907<br>(4330.7822)    |                             |
| unins        | 142.8105<br>(6895.8863)      |                             |
| medicaid     | -8121.8299*<br>(4530.6711)   |                             |
| medicare     | -6427.7576<br>(4045.4466)    |                             |
| female       | 2298.1761<br>(3595.2751)     |                             |
| smoker       | -456.3687<br>(4380.6724)     |                             |
| married      | 8154.2401*<br>(4185.1934)    |                             |
| black        | 212.4645<br>(4022.3443)      |                             |
| amind        | -17440.4036<br>(27878.0165)  |                             |
| asian        | -18642.0964**<br>(9232.0893) |                             |
| othrace      | -714.9842<br>(9618.1798)     |                             |
| midwest      | -5583.9283<br>(5439.0387)    |                             |
| south        | -6472.1873<br>(5030.5630)    |                             |
| west         | -427.9161<br>(5685.6240)     |                             |
| lesshischool | 3739.6139<br>(4940.1871)     |                             |
| collegeplus  | 4451.8055<br>(4151.6124)     |                             |
| poor         | -142.5480<br>(5333.8136)     |                             |
| nearpoor     | -7427.6623<br>(8664.3927)    |                             |
| middleinc    | -27.1970                     |                             |

|             |               |           |
|-------------|---------------|-----------|
|             | (5492.0452)   |           |
| highinc     | -3606.8024    |           |
|             | (6104.6425)   |           |
| _cons       | 30683.5370*** |           |
|             | (8389.7270)   |           |
| <hr/>       |               |           |
| No. of Obs. | 3353.0000     | 3353.0000 |
| R-Squared   |               |           |
| <hr/>       |               |           |



|              | (1)<br>inpatient<br>Coef./std.errors | (2)<br>Coef./std.errors    |
|--------------|--------------------------------------|----------------------------|
| main         |                                      |                            |
| overweight   | 0.2030<br>(0.1703)                   |                            |
| obese        | 0.2306<br>(0.1714)                   |                            |
| female       | 0.0625<br>(0.1360)                   |                            |
| smoker       | 0.4135**<br>(0.1845)                 |                            |
| married      | -0.3582**<br>(0.1437)                |                            |
| black        | -0.0297<br>(0.1748)                  |                            |
| amind        | 0.6083<br>(0.6573)                   |                            |
| asian        | -0.2935<br>(0.3212)                  |                            |
| othrace      | -0.3379<br>(0.4804)                  |                            |
| midwest      | 0.1274<br>(0.2186)                   |                            |
| south        | 0.1298<br>(0.1960)                   |                            |
| west         | -0.3049<br>(0.2271)                  |                            |
| lesshischool | 0.0608<br>(0.1939)                   |                            |
| collegeplus  | 0.2686*<br>(0.1628)                  |                            |
| poor         | -0.2934<br>(0.2428)                  |                            |
| nearpoor     | 0.3434<br>(0.2887)                   |                            |
| middleinc    | -0.2061<br>(0.2032)                  |                            |
| highinc      | -0.3228<br>(0.2098)                  |                            |
| _bs_1        |                                      | 6.1996e+09<br>(4.8753e+09) |
| _bs_2        |                                      | 0.1097<br>(0.0812)         |
| _cons        | -2.0278***<br>(0.2964)               |                            |

---

|              |                              |           |
|--------------|------------------------------|-----------|
| glm          |                              |           |
| overweight   | 2853.8682<br>(3552.3007)     |           |
| obese        | 887.3801<br>(3452.4311)      |           |
| female       | -239.7047<br>(2770.3067)     |           |
| smoker       | -4025.5523<br>(3752.5214)    |           |
| married      | -467.9081<br>(2946.9202)     |           |
| black        | -1519.1410<br>(3404.4166)    |           |
| amind        | 1985.6599<br>(12734.4758)    |           |
| asian        | 5357.7238<br>(6600.0997)     |           |
| othrace      | 7049.1023<br>(9924.3713)     |           |
| midwest      | -546.6661<br>(4507.5557)     |           |
| south        | 77.5321<br>(4019.0285)       |           |
| west         | 2705.7450<br>(4835.2789)     |           |
| lesshischool | -1198.5243<br>(3907.8267)    |           |
| collegeplus  | -6176.0909*<br>(3293.5594)   |           |
| poor         | 5528.8371<br>(4904.4178)     |           |
| nearpoor     | 2292.1699<br>(5560.5696)     |           |
| middleinc    | 8258.2232**<br>(4113.3533)   |           |
| highinc      | 5861.1050<br>(4303.4706)     |           |
| _cons        | 16411.2265***<br>(5865.3895) |           |
| No. of Obs.  | 2309.0000                    | 2309.0000 |
| R-Squared    |                              |           |

---

|              | (1)<br>inpatient<br>Coef./std.errors | (2)<br>Coef./std.errors    |
|--------------|--------------------------------------|----------------------------|
| main         |                                      |                            |
| overweight   | 0.1718<br>(0.1627)                   |                            |
| obese        | 0.4618***<br>(0.1758)                |                            |
| female       | -0.0996<br>(0.1479)                  |                            |
| smoker       | -0.2770<br>(0.4153)                  |                            |
| married      | -0.2069<br>(0.1534)                  |                            |
| black        | -0.1052<br>(0.1999)                  |                            |
| amind        | 0.6259<br>(0.6935)                   |                            |
| asian        | -1.3503***<br>(0.4735)               |                            |
| othrace      | -0.3491<br>(0.7619)                  |                            |
| midwest      | -0.0528<br>(0.2170)                  |                            |
| south        | 0.0084<br>(0.1889)                   |                            |
| west         | 0.1205<br>(0.2111)                   |                            |
| lesshischool | 0.0578<br>(0.1770)                   |                            |
| collegeplus  | -0.3439**<br>(0.1672)                |                            |
| poor         | 0.0323<br>(0.2272)                   |                            |
| nearpoor     | 0.2964<br>(0.3009)                   |                            |
| middleinc    | 0.2612<br>(0.2010)                   |                            |
| highinc      | 0.1550<br>(0.2168)                   |                            |
| _bs_1        |                                      | 3.2970e+09<br>(3.4988e+09) |
| _bs_2        |                                      | 0.0684<br>(0.0703)         |
| _cons        | -1.6675***<br>(0.2752)               |                            |

---

|              |                              |           |
|--------------|------------------------------|-----------|
| glm          |                              |           |
| overweight   | 1000.0608<br>(3052.5234)     |           |
| obese        | 3556.7138<br>(3301.1689)     |           |
| female       | -3886.7867<br>(2791.7741)    |           |
| smoker       | -3819.6966<br>(8029.9174)    |           |
| married      | -1059.6734<br>(3002.4022)    |           |
| black        | -1180.2407<br>(3735.1474)    |           |
| amind        | -15863.6516<br>(12125.8145)  |           |
| asian        | -8807.9483<br>(9423.6021)    |           |
| othrace      | -6890.7714<br>(14774.8247)   |           |
| midwest      | -1398.6981<br>(4046.3570)    |           |
| south        | -2155.0455<br>(3549.7179)    |           |
| west         | 5405.6448<br>(3938.2869)     |           |
| lesshischool | 5673.2746*<br>(3302.2334)    |           |
| collegeplus  | 3974.9115<br>(3163.1743)     |           |
| poor         | -2483.8784<br>(4274.1909)    |           |
| nearpoor     | -2065.3277<br>(5561.7259)    |           |
| middleinc    | -3304.0186<br>(3922.6660)    |           |
| highinc      | -2042.2455<br>(4050.4232)    |           |
| _cons        | 17602.1801***<br>(5577.9757) |           |
| No. of Obs.  | 1640.0000                    | 1640.0000 |
| R-Squared    |                              |           |

---

|              | (1)<br>inpatient<br>Coef./std.errors | (2)<br>Coef./std.errors |
|--------------|--------------------------------------|-------------------------|
| main         |                                      |                         |
| overweight   | 0.0464<br>(0.0718)                   |                         |
| obese        | 0.2066***<br>(0.0708)                |                         |
| age3544      | -0.1680<br>(0.1030)                  |                         |
| age4554      | -0.1363<br>(0.1001)                  |                         |
| age5564      | 0.2197**<br>(0.0919)                 |                         |
| age6574      | 0.6304***<br>(0.0901)                |                         |
| age75plus    | 0.9587***<br>(0.0921)                |                         |
| female       | 0.4871***<br>(0.0604)                |                         |
| smoker       | 0.2139***<br>(0.0802)                |                         |
| married      | 0.0390<br>(0.0625)                   |                         |
| black        | -0.0356<br>(0.0734)                  |                         |
| amind        | 0.0187<br>(0.3414)                   |                         |
| asian        | -0.4037***<br>(0.1320)               |                         |
| othrace      | -0.0558<br>(0.1753)                  |                         |
| midwest      | 0.1424<br>(0.0904)                   |                         |
| south        | 0.0507<br>(0.0818)                   |                         |
| west         | -0.1719*<br>(0.0915)                 |                         |
| lesshischool | -0.0384<br>(0.0806)                  |                         |
| collegeplus  | 0.0159<br>(0.0670)                   |                         |
| poor         | 0.4383***<br>(0.0913)                |                         |
| nearpoor     | 0.1568<br>(0.1335)                   |                         |

|              |                              |                            |
|--------------|------------------------------|----------------------------|
| middleinc    | -0.2145**<br>(0.0891)        |                            |
| highinc      | -0.4137***<br>(0.0934)       |                            |
| _bs_1        |                              | 9.5831e+09<br>(1.0292e+10) |
| _bs_2        |                              | 0.0352<br>(0.0373)         |
| _cons        | -2.9328***<br>(0.1321)       |                            |
| <hr/>        |                              |                            |
| glm          |                              |                            |
| overweight   | 1288.5776<br>(1600.6419)     |                            |
| obese        | 176.0602<br>(1557.4357)      |                            |
| age3544      | 3567.7275<br>(2335.3043)     |                            |
| age4554      | 9775.5514***<br>(2254.9131)  |                            |
| age5564      | 11178.4394***<br>(2077.5825) |                            |
| age6574      | 5315.5822***<br>(2050.5221)  |                            |
| age75plus    | 2940.4923<br>(2077.9635)     |                            |
| female       | -2078.6191<br>(1395.0294)    |                            |
| smoker       | -768.7965<br>(1811.2373)     |                            |
| married      | -822.3417<br>(1417.6979)     |                            |
| black        | 74.3313<br>(1602.6946)       |                            |
| amind        | -3053.4765<br>(7447.2250)    |                            |
| asian        | -4012.1297<br>(3002.9835)    |                            |
| othrace      | 3178.4434<br>(3900.4726)     |                            |
| midwest      | -4655.1744**<br>(1990.8601)  |                            |
| south        | -3191.5948*<br>(1809.1519)   |                            |
| west         | 532.5519<br>(2034.2688)      |                            |
| lesshischool | 2640.4250                    |                            |

|             |               |            |
|-------------|---------------|------------|
|             | (1764.2357)   |            |
| collegeplus | 2523.8087*    |            |
|             | (1487.1015)   |            |
| poor        | -1323.0905    |            |
|             | (2016.9226)   |            |
| nearpoor    | -3542.9993    |            |
|             | (2919.8651)   |            |
| middleinc   | 3048.0068     |            |
|             | (1986.3387)   |            |
| highinc     | 2729.1593     |            |
|             | (2090.4483)   |            |
| _cons       | 14146.5026*** |            |
|             | (3053.8433)   |            |
| <hr/>       |               |            |
| No. of Obs. | 17196.0000    | 17196.0000 |
| R-Squared   |               |            |
| <hr/>       |               |            |

|              | (1)<br>inpatient<br>Coef./std.errors | (2)<br>Coef./std.errors |
|--------------|--------------------------------------|-------------------------|
| main         |                                      |                         |
| overweight   | 0.0205<br>(0.1052)                   |                         |
| obese        | 0.3035***<br>(0.1043)                |                         |
| age3544      | -0.1575<br>(0.1399)                  |                         |
| age4554      | -0.1674<br>(0.1381)                  |                         |
| age5564      | 0.0910<br>(0.1335)                   |                         |
| age6574      | 0.6653***<br>(0.1443)                |                         |
| age75plus    | 1.3147***<br>(0.1432)                |                         |
| female       | 0.5888***<br>(0.0873)                |                         |
| smoker       | 0.0279<br>(0.1434)                   |                         |
| married      | 0.3459***<br>(0.0918)                |                         |
| black        | -0.0590<br>(0.1202)                  |                         |
| amind        | 0.4310<br>(0.5286)                   |                         |
| asian        | -0.0856<br>(0.1605)                  |                         |
| othrace      | 0.0156<br>(0.2571)                   |                         |
| midwest      | -0.0353<br>(0.1327)                  |                         |
| south        | -0.0236<br>(0.1228)                  |                         |
| west         | -0.2072<br>(0.1361)                  |                         |
| lesshischool | -0.0083<br>(0.1520)                  |                         |
| collegeplus  | 0.0666<br>(0.0969)                   |                         |
| poor         | 0.1930<br>(0.1944)                   |                         |
| nearpoor     | 0.0858<br>(0.2749)                   |                         |



|              |                              |                            |
|--------------|------------------------------|----------------------------|
| middleinc    | -0.1220<br>(0.1364)          |                            |
| highinc      | -0.2741**<br>(0.1373)        |                            |
| _bs_1        |                              | 2.8957e+09<br>(8.1595e+09) |
| _bs_2        |                              | 0.0170<br>(0.0476)         |
| _cons        | -3.4249***<br>(0.2070)       |                            |
| <hr/>        |                              |                            |
| glm          |                              |                            |
| overweight   | 752.3977<br>(2515.2907)      |                            |
| obese        | 32.0338<br>(2499.7390)       |                            |
| age3544      | 4765.7158<br>(3369.0131)     |                            |
| age4554      | 15240.7460***<br>(3305.8907) |                            |
| age5564      | 18602.8074***<br>(3231.4261) |                            |
| age6574      | 5434.0670<br>(3482.4903)     |                            |
| age75plus    | 3144.7592<br>(3425.9951)     |                            |
| female       | -3276.5865<br>(2160.5240)    |                            |
| smoker       | 2526.2321<br>(3466.1274)     |                            |
| married      | -2219.4602<br>(2244.6451)    |                            |
| black        | -2170.8368<br>(2879.5370)    |                            |
| amind        | -7950.3296<br>(12428.9529)   |                            |
| asian        | -4808.7685<br>(3880.9894)    |                            |
| othrace      | 1219.0099<br>(6230.6698)     |                            |
| midwest      | -5566.5183*<br>(3155.1495)   |                            |
| south        | -5677.3015*<br>(2929.0091)   |                            |
| west         | 476.2371<br>(3236.2827)      |                            |
| lesshischool | 5763.7376                    |                            |

|             |               |            |
|-------------|---------------|------------|
|             | (3588.4235)   |            |
| collegeplus | 5294.5318**   |            |
|             | (2326.1911)   |            |
| poor        | 678.8772      |            |
|             | (4581.5360)   |            |
| nearpoor    | -4220.5826    |            |
|             | (6468.7403)   |            |
| middleinc   | 391.8166      |            |
|             | (3257.5235)   |            |
| highinc     | -1241.9206    |            |
|             | (3285.3796)   |            |
| _cons       | 17485.2045*** |            |
|             | (5339.0021)   |            |
| <hr/>       |               |            |
| No. of Obs. | 11222.0000    | 11222.0000 |
| R-Squared   |               |            |
| <hr/>       |               |            |

|              | (1)<br>inpatient<br>Coef./std.errors | (2)<br>Coef./std.errors |
|--------------|--------------------------------------|-------------------------|
| main         |                                      |                         |
| overweight   | -0.0184<br>(0.1256)                  |                         |
| obese        | -0.0335<br>(0.1210)                  |                         |
| age3544      | -0.2660<br>(0.1640)                  |                         |
| age4554      | -0.1371<br>(0.1624)                  |                         |
| age5564      | 0.3728***<br>(0.1433)                |                         |
| age6574      | 0.6648***<br>(0.1688)                |                         |
| age75plus    | 0.7066***<br>(0.1799)                |                         |
| female       | 0.6100***<br>(0.1141)                |                         |
| smoker       | 0.0871<br>(0.1185)                   |                         |
| married      | -0.0743<br>(0.1234)                  |                         |
| black        | -0.1222<br>(0.1132)                  |                         |
| amind        | -1.4525<br>(1.0248)                  |                         |
| asian        | -0.8137***<br>(0.2679)               |                         |
| othrace      | -0.1693<br>(0.2795)                  |                         |
| midwest      | 0.3883**<br>(0.1508)                 |                         |
| south        | 0.3190**<br>(0.1355)                 |                         |
| west         | -0.3399**<br>(0.1473)                |                         |
| lesshischool | -0.0845<br>(0.1171)                  |                         |
| collegeplus  | 0.1001<br>(0.1271)                   |                         |
| poor         | 0.2252*<br>(0.1299)                  |                         |
| nearpoor     | -0.0924<br>(0.1893)                  |                         |

|              |                            |                            |
|--------------|----------------------------|----------------------------|
| middleinc    | -0.1271<br>(0.1722)        |                            |
| highinc      | -0.3030<br>(0.3063)        |                            |
| _bs_1        |                            | 4.4569e+09<br>(4.0958e+09) |
| _bs_2        |                            | 0.0847<br>(0.0763)         |
| _cons        | -2.4546***<br>(0.2029)     |                            |
| <hr/>        |                            |                            |
| glm          |                            |                            |
| overweight   | 4630.8584<br>(2824.0484)   |                            |
| obese        | 5.1181<br>(2712.1932)      |                            |
| age3544      | 2915.6094<br>(3807.0962)   |                            |
| age4554      | 2385.4156<br>(3727.2299)   |                            |
| age5564      | 4938.5405<br>(3301.8311)   |                            |
| age6574      | 5023.4514<br>(3891.6128)   |                            |
| age75plus    | 3814.0517<br>(4037.7097)   |                            |
| female       | -1198.7510<br>(2705.7152)  |                            |
| smoker       | 1480.4665<br>(2724.1426)   |                            |
| married      | -2180.0988<br>(2758.9566)  |                            |
| black        | -205.8441<br>(2511.8396)   |                            |
| amind        | -4927.1294<br>(24398.4671) |                            |
| asian        | -2474.9894<br>(6218.5735)  |                            |
| othrace      | -495.9784<br>(6275.8189)   |                            |
| midwest      | -5631.2814*<br>(3390.2672) |                            |
| south        | -1853.6195<br>(3018.7275)  |                            |
| west         | -1711.0233<br>(3365.4281)  |                            |
| lesshischool | 883.7690                   |                            |

|             |               |           |
|-------------|---------------|-----------|
|             | (2631.1152)   |           |
| collegeplus | -876.3627     |           |
|             | (2820.7116)   |           |
| poor        | -1334.0044    |           |
|             | (2910.3403)   |           |
| nearpoor    | -3354.3068    |           |
|             | (4249.2817)   |           |
| middleinc   | 8086.3213**   |           |
|             | (3960.1160)   |           |
| highinc     | 13141.6291*   |           |
|             | (7013.4594)   |           |
| _cons       | 13817.9197*** |           |
|             | (4758.5488)   |           |
| <hr/>       |               |           |
| No. of Obs. | 3772.0000     | 3772.0000 |
| R-Squared   |               |           |
| <hr/>       |               |           |

|              | (1)<br>inpatient<br>Coef./std.errors | (2)<br>Coef./std.errors |
|--------------|--------------------------------------|-------------------------|
| main         |                                      |                         |
| overweight   | 0.1154<br>(0.1072)                   |                         |
| obese        | 0.1906*<br>(0.1097)                  |                         |
| age3544      | 0.5315<br>(0.4299)                   |                         |
| age4554      | 0.1224<br>(0.3980)                   |                         |
| age5564      | 0.4034<br>(0.3673)                   |                         |
| age6574      | -0.0857<br>(0.3556)                  |                         |
| age75plus    | 0.2430<br>(0.3569)                   |                         |
| female       | 0.0748<br>(0.0888)                   |                         |
| smoker       | 0.3317***<br>(0.1267)                |                         |
| married      | -0.2437***<br>(0.0945)               |                         |
| black        | -0.0542<br>(0.1125)                  |                         |
| amind        | -0.0417<br>(0.4556)                  |                         |
| asian        | -0.4978**<br>(0.2399)                |                         |
| othrace      | -0.1877<br>(0.2972)                  |                         |
| midwest      | 0.0716<br>(0.1361)                   |                         |
| south        | 0.0515<br>(0.1208)                   |                         |
| west         | -0.1478<br>(0.1409)                  |                         |
| lesshischool | 0.1113<br>(0.1149)                   |                         |
| collegeplus  | 0.0763<br>(0.1019)                   |                         |
| poor         | -0.0352<br>(0.1340)                  |                         |
| nearpoor     | 0.0589<br>(0.1841)                   |                         |

|              |                              |                             |
|--------------|------------------------------|-----------------------------|
| middleinc    | -0.0351<br>(0.1262)          |                             |
| highinc      | -0.1779<br>(0.1371)          |                             |
| _bs_1        |                              | 1.1613e+10*<br>(6.2590e+09) |
| _bs_2        |                              | 0.0907*<br>(0.0478)         |
| _cons        | -1.9117***<br>(0.3852)       |                             |
| <hr/>        |                              |                             |
| glm          |                              |                             |
| overweight   | 3223.6035<br>(2225.1562)     |                             |
| obese        | 1665.7601<br>(2237.0545)     |                             |
| age3544      | -5800.7395<br>(8698.5269)    |                             |
| age4554      | -7530.8476<br>(8171.1207)    |                             |
| age5564      | -12364.0650<br>(7577.4995)   |                             |
| age6574      | -12639.1432*<br>(7437.9768)  |                             |
| age75plus    | -14970.0130**<br>(7489.7610) |                             |
| female       | -880.3699<br>(1839.3067)     |                             |
| smoker       | -511.3810<br>(2623.5606)     |                             |
| married      | -1299.9772<br>(1978.3760)    |                             |
| black        | 657.6487<br>(2271.9367)      |                             |
| amind        | -5626.6795<br>(9289.1570)    |                             |
| asian        | 671.9345<br>(5131.0400)      |                             |
| othrace      | 5114.3179<br>(6186.2085)     |                             |
| midwest      | -379.5060<br>(2797.6047)     |                             |
| south        | 1917.2964<br>(2472.6081)     |                             |
| west         | 5601.5573*<br>(2935.3715)    |                             |
| lesshischool | 3127.9792                    |                             |

|             |               |           |
|-------------|---------------|-----------|
|             | (2353.7386)   |           |
| collegeplus | 979.6703      |           |
|             | (2099.9814)   |           |
| poor        | 609.7110      |           |
|             | (2725.0952)   |           |
| nearpoor    | -2125.6033    |           |
|             | (3722.2059)   |           |
| middleinc   | 3187.9857     |           |
|             | (2614.5068)   |           |
| highinc     | 2323.4910     |           |
|             | (2823.3175)   |           |
| _cons       | 26154.6249*** |           |
|             | (8178.8433)   |           |
| <hr/>       |               |           |
| No. of Obs. | 4547.0000     | 4547.0000 |
| R-Squared   |               |           |
| <hr/>       |               |           |



|              | (1)                    | (2)              |
|--------------|------------------------|------------------|
|              | totalexp               |                  |
|              | Coef./std.errors       | Coef./std.errors |
| main         |                        |                  |
| overweight   | 0.0956<br>(0.1176)     |                  |
| obese        | 0.2103*<br>(0.1273)    |                  |
| unins        | -0.4908***<br>(0.1411) |                  |
| medicaid     | 0.4073**<br>(0.1658)   |                  |
| medicare     | 1.2989**<br>(0.5255)   |                  |
| female       | 0.6918***<br>(0.1022)  |                  |
| smoker       | 0.3715**<br>(0.1531)   |                  |
| married      | 0.5643***<br>(0.1183)  |                  |
| black        | -0.3274**<br>(0.1547)  |                  |
| amind        | -0.4447<br>(0.5644)    |                  |
| asian        | -0.3703*<br>(0.1961)   |                  |
| othrace      | -0.1723<br>(0.2584)    |                  |
| midwest      | -0.1059<br>(0.1653)    |                  |
| south        | -0.2135<br>(0.1522)    |                  |
| west         | -0.1463<br>(0.1577)    |                  |
| lesshischool | -0.4055**<br>(0.1612)  |                  |
| collegeplus  | 0.0731<br>(0.1275)     |                  |
| poor         | 0.3173<br>(0.2029)     |                  |
| nearpoor     | -0.3457<br>(0.2722)    |                  |
| middleinc    | -0.1059<br>(0.1738)    |                  |
| highinc      | -0.0519<br>(0.1777)    |                  |

|             |                       |                            |
|-------------|-----------------------|----------------------------|
| _bs_1       |                       | 8.3590e+09<br>(5.1241e+09) |
| _bs_2       |                       | 0.0613<br>(0.0375)         |
| _cons       | 7.1212***<br>(0.2195) |                            |
| No. of Obs. | 6003.0000             | 6003.0000                  |
| R-Squared   |                       |                            |

|              | (1)                    | (2)              |
|--------------|------------------------|------------------|
|              | totalexp               |                  |
|              | Coef./std.errors       | Coef./std.errors |
| main         |                        |                  |
| overweight   | -0.1197<br>(0.1336)    |                  |
| obese        | 0.3724***<br>(0.1358)  |                  |
| unins        | -0.6085***<br>(0.1544) |                  |
| medicaid     | 0.0658<br>(0.1901)     |                  |
| medicare     | 1.8221***<br>(0.3786)  |                  |
| female       | 0.5338***<br>(0.1059)  |                  |
| smoker       | 0.2534<br>(0.1559)     |                  |
| married      | -0.2070*<br>(0.1199)   |                  |
| black        | -0.5280***<br>(0.1648) |                  |
| amind        | 0.4618<br>(0.5239)     |                  |
| asian        | -0.4526**<br>(0.2070)  |                  |
| othrace      | -0.0551<br>(0.3230)    |                  |
| midwest      | 0.1096<br>(0.1781)     |                  |
| south        | 0.3274**<br>(0.1587)   |                  |
| west         | 0.2036<br>(0.1648)     |                  |
| lesshischool | -0.4674**<br>(0.1920)  |                  |
| collegeplus  | -0.0951<br>(0.1345)    |                  |
| poor         | 0.5171**<br>(0.2369)   |                  |
| nearpoor     | 0.5483*<br>(0.3104)    |                  |
| middleinc    | 0.3065*<br>(0.1817)    |                  |
| highinc      | 0.5288***<br>(0.1799)  |                  |

|             |                       |                               |
|-------------|-----------------------|-------------------------------|
| _bs_1       |                       | 1.7153e+10***<br>(6.3084e+09) |
| _bs_2       |                       | 0.1468***<br>(0.0518)         |
| _cons       | 7.3118***<br>(0.2638) |                               |
| No. of Obs. | 3609.0000             | 3609.0000                     |
| R-Squared   |                       |                               |

|              | (1)<br>totalexp<br>Coef./std.errors | (2)<br>Coef./std.errors |
|--------------|-------------------------------------|-------------------------|
| main         |                                     |                         |
| overweight   | 0.1763<br>(0.1391)                  |                         |
| obese        | 0.3852***<br>(0.1378)               |                         |
| unins        | -0.8727***<br>(0.1836)              |                         |
| medicaid     | -0.1129<br>(0.2237)                 |                         |
| medicare     | 1.2227***<br>(0.2721)               |                         |
| female       | 0.3174***<br>(0.1095)               |                         |
| smoker       | 0.0685<br>(0.1514)                  |                         |
| married      | -0.1791<br>(0.1275)                 |                         |
| black        | -0.1345<br>(0.1731)                 |                         |
| amind        | 0.4063<br>(0.5916)                  |                         |
| asian        | -0.2070<br>(0.2241)                 |                         |
| othrace      | 0.5706<br>(0.3522)                  |                         |
| midwest      | -0.0939<br>(0.1781)                 |                         |
| south        | -0.0334<br>(0.1618)                 |                         |
| west         | -0.2616<br>(0.1731)                 |                         |
| lesshischool | -0.1003<br>(0.1937)                 |                         |
| collegeplus  | 0.3819***<br>(0.1268)               |                         |
| poor         | 0.0263<br>(0.2537)                  |                         |
| nearpoor     | 0.0448<br>(0.3662)                  |                         |
| middleinc    | -0.4198**<br>(0.2053)               |                         |
| highinc      | -0.3395*<br>(0.2034)                |                         |

|             |                       |                               |
|-------------|-----------------------|-------------------------------|
| _bs_1       |                       | 2.4668e+10***<br>(8.7772e+09) |
| _bs_2       |                       | 0.1460***<br>(0.0509)         |
| _cons       | 8.2673***<br>(0.2876) |                               |
| No. of Obs. | 3652.0000             | 3652.0000                     |
| R-Squared   |                       |                               |

|              | (1)                    | (2)              |
|--------------|------------------------|------------------|
|              | totalexp               |                  |
|              | Coef./std.errors       | Coef./std.errors |
| main         |                        |                  |
| overweight   | -0.1478<br>(0.1044)    |                  |
| obese        | 0.1950*<br>(0.1060)    |                  |
| unins        | -0.0645<br>(0.1452)    |                  |
| medicaid     | 0.5003***<br>(0.1590)  |                  |
| medicare     | 0.7979***<br>(0.1511)  |                  |
| female       | 0.0764<br>(0.0841)     |                  |
| smoker       | -0.0492<br>(0.1158)    |                  |
| married      | 0.1435<br>(0.0944)     |                  |
| black        | 0.0114<br>(0.1288)     |                  |
| amind        | -0.6729*<br>(0.3999)   |                  |
| asian        | -0.6642***<br>(0.2054) |                  |
| othrace      | 0.0039<br>(0.2746)     |                  |
| midwest      | 0.0963<br>(0.1326)     |                  |
| south        | 0.0918<br>(0.1207)     |                  |
| west         | 0.0751<br>(0.1329)     |                  |
| lesshischool | -0.1905<br>(0.1450)    |                  |
| collegeplus  | 0.2212**<br>(0.0935)   |                  |
| poor         | 0.1919<br>(0.1880)     |                  |
| nearpoor     | -0.2414<br>(0.2600)    |                  |
| middleinc    | 0.0712<br>(0.1583)     |                  |
| highinc      | 0.0298<br>(0.1536)     |                  |

|             |           |              |
|-------------|-----------|--------------|
| _bs_1       |           | 1.8232e+10   |
|             |           | (1.1686e+10) |
| _bs_2       |           | 0.0763       |
|             |           | (0.0487)     |
| _cons       | 8.2674*** |              |
|             | (0.2118)  |              |
| <hr/>       |           |              |
| No. of Obs. | 3353.0000 | 3353.0000    |
| R-Squared   |           |              |
| <hr/>       |           |              |



|              | (1)<br>totalexp<br>Coef./std.errors | (2)<br>Coef./std.errors      |
|--------------|-------------------------------------|------------------------------|
| main         |                                     |                              |
| overweight   | 0.0778<br>(0.1040)                  |                              |
| obese        | 0.2716***<br>(0.1039)               |                              |
| female       | 0.0163<br>(0.0854)                  |                              |
| smoker       | -0.1473<br>(0.1314)                 |                              |
| married      | -0.3581***<br>(0.0933)              |                              |
| black        | -0.1546<br>(0.1484)                 |                              |
| amind        | 0.3243<br>(0.5368)                  |                              |
| asian        | -0.1820<br>(0.2075)                 |                              |
| othrace      | -0.0190<br>(0.2746)                 |                              |
| midwest      | 0.2158<br>(0.1356)                  |                              |
| south        | 0.1699<br>(0.1230)                  |                              |
| west         | -0.0560<br>(0.1331)                 |                              |
| lesshischool | -0.0552<br>(0.1387)                 |                              |
| collegeplus  | -0.0357<br>(0.0994)                 |                              |
| poor         | 0.1475<br>(0.1911)                  |                              |
| nearpoor     | 0.1831<br>(0.2390)                  |                              |
| middleinc    | 0.0770<br>(0.1401)                  |                              |
| highinc      | 0.2532*<br>(0.1391)                 |                              |
| _bs_1        |                                     | 2.2574e+10**<br>(1.0892e+10) |
| _bs_2        |                                     | 0.0961**<br>(0.0450)         |
| _cons        | 8.9751***<br>(0.1957)               |                              |

---

|             |           |           |
|-------------|-----------|-----------|
| No. of Obs. | 2309.0000 | 2309.0000 |
| R-Squared   |           |           |

---

|              | (1)<br>totalexp<br>Coef./std.errors | (2)<br>Coef./std.errors      |
|--------------|-------------------------------------|------------------------------|
| main         |                                     |                              |
| overweight   | 0.0166<br>(0.0866)                  |                              |
| obese        | 0.2884***<br>(0.1023)               |                              |
| female       | -0.0630<br>(0.0826)                 |                              |
| smoker       | -0.4090*<br>(0.2209)                |                              |
| married      | 0.0170<br>(0.0874)                  |                              |
| black        | -0.2261<br>(0.1484)                 |                              |
| amind        | 0.1736<br>(0.4574)                  |                              |
| asian        | -0.6627***<br>(0.2030)              |                              |
| othrace      | -0.6672<br>(0.4626)                 |                              |
| midwest      | -0.0340<br>(0.1154)                 |                              |
| south        | -0.0291<br>(0.1040)                 |                              |
| west         | 0.2125*<br>(0.1210)                 |                              |
| lesshischool | 0.0003<br>(0.1139)                  |                              |
| collegeplus  | -0.1261<br>(0.0879)                 |                              |
| poor         | 0.0300<br>(0.1455)                  |                              |
| nearpoor     | -0.0920<br>(0.1858)                 |                              |
| middleinc    | -0.1334<br>(0.1139)                 |                              |
| highinc      | -0.0499<br>(0.1130)                 |                              |
| _bs_1        |                                     | 1.2109e+10**<br>(4.7852e+09) |
| _bs_2        |                                     | 0.0696**<br>(0.0277)         |
| _cons        | 9.2590***<br>(0.1568)               |                              |

---

|             |           |           |
|-------------|-----------|-----------|
| No. of Obs. | 1640.0000 | 1640.0000 |
| R-Squared   |           |           |

---

|              | (1)<br>totalexp<br>Coef./std.errors | (2)<br>Coef./std.errors |
|--------------|-------------------------------------|-------------------------|
| main         |                                     |                         |
| overweight   | 0.0518<br>(0.0522)                  |                         |
| obese        | 0.2605***<br>(0.0543)               |                         |
| age3544      | 0.3983***<br>(0.0696)               |                         |
| age4554      | 0.7507***<br>(0.0678)               |                         |
| age5564      | 1.0503***<br>(0.0674)               |                         |
| age6574      | 1.3806***<br>(0.0716)               |                         |
| age75plus    | 1.4767***<br>(0.0821)               |                         |
| female       | 0.3347***<br>(0.0435)               |                         |
| smoker       | 0.1120*<br>(0.0664)                 |                         |
| married      | 0.0203<br>(0.0471)                  |                         |
| black        | -0.2499***<br>(0.0698)              |                         |
| amind        | 0.0549<br>(0.2690)                  |                         |
| asian        | -0.4700***<br>(0.0917)              |                         |
| othrace      | -0.0115<br>(0.1350)                 |                         |
| midwest      | 0.0142<br>(0.0690)                  |                         |
| south        | -0.0073<br>(0.0625)                 |                         |
| west         | -0.0265<br>(0.0673)                 |                         |
| lesshischool | -0.0838<br>(0.0756)                 |                         |
| collegeplus  | 0.1145**<br>(0.0507)                |                         |
| poor         | 0.4044***<br>(0.0967)               |                         |
| nearpoor     | 0.0119<br>(0.1320)                  |                         |

|             |                       |                               |
|-------------|-----------------------|-------------------------------|
| middleinc   | -0.0903<br>(0.0769)   |                               |
| highinc     | -0.1049<br>(0.0750)   |                               |
| _bs_1       |                       | 8.6358e+10***<br>(1.8597e+10) |
| _bs_2       |                       | 0.0845***<br>(0.0182)         |
| _cons       | 7.4595***<br>(0.1027) |                               |
| No. of Obs. | 17196.0000            | 17196.0000                    |
| R-Squared   |                       |                               |

|              | (1)                    | (2)              |
|--------------|------------------------|------------------|
|              | totalexp               |                  |
|              | Coef./std.errors       | Coef./std.errors |
| main         |                        |                  |
| overweight   | 0.0328<br>(0.0652)     |                  |
| obese        | 0.2645***<br>(0.0686)  |                  |
| age3544      | 0.3466***<br>(0.0826)  |                  |
| age4554      | 0.7116***<br>(0.0807)  |                  |
| age5564      | 1.0338***<br>(0.0815)  |                  |
| age6574      | 1.3575***<br>(0.1016)  |                  |
| age75plus    | 1.6255***<br>(0.1231)  |                  |
| female       | 0.4312***<br>(0.0548)  |                  |
| smoker       | 0.1853**<br>(0.0902)   |                  |
| married      | 0.1397**<br>(0.0584)   |                  |
| black        | -0.2332**<br>(0.0933)  |                  |
| amind        | 0.2200<br>(0.3944)     |                  |
| asian        | -0.4313***<br>(0.1115) |                  |
| othrace      | 0.0996<br>(0.1714)     |                  |
| midwest      | -0.0217<br>(0.0863)    |                  |
| south        | -0.0140<br>(0.0788)    |                  |
| west         | -0.0343<br>(0.0857)    |                  |
| lesshischool | -0.0597<br>(0.1132)    |                  |
| collegeplus  | 0.2129***<br>(0.0634)  |                  |
| poor         | 0.2228<br>(0.1738)     |                  |
| nearpoor     | 0.0693<br>(0.2328)     |                  |

|             |                       |                               |
|-------------|-----------------------|-------------------------------|
| middleinc   | -0.0613<br>(0.1097)   |                               |
| highinc     | -0.0854<br>(0.1068)   |                               |
| _bs_1       |                       | 5.4389e+10***<br>(1.3762e+10) |
| _bs_2       |                       | 0.0829***<br>(0.0208)         |
| _cons       | 7.2319***<br>(0.1433) |                               |
| No. of Obs. | 11222.0000            | 11222.0000                    |
| R-Squared   |                       |                               |



|              | (1)                    | (2)              |
|--------------|------------------------|------------------|
|              | totalexp               |                  |
|              | Coef./std.errors       | Coef./std.errors |
| main         |                        |                  |
| overweight   | 0.1459<br>(0.1223)     |                  |
| obese        | 0.2648**<br>(0.1196)   |                  |
| age3544      | 0.3796**<br>(0.1476)   |                  |
| age4554      | 0.7129***<br>(0.1486)  |                  |
| age5564      | 1.1989***<br>(0.1469)  |                  |
| age6574      | 1.6442***<br>(0.1931)  |                  |
| age75plus    | 1.4095***<br>(0.1948)  |                  |
| female       | 0.0864<br>(0.1034)     |                  |
| smoker       | -0.0103<br>(0.1149)    |                  |
| married      | -0.2014*<br>(0.1156)   |                  |
| black        | -0.4125***<br>(0.1255) |                  |
| amind        | -0.6125<br>(0.5036)    |                  |
| asian        | -0.5264**<br>(0.2065)  |                  |
| othrace      | -0.0388<br>(0.2459)    |                  |
| midwest      | 0.0388<br>(0.1485)     |                  |
| south        | 0.0692<br>(0.1425)     |                  |
| west         | -0.3435**<br>(0.1376)  |                  |
| lesshischool | -0.1840<br>(0.1211)    |                  |
| collegeplus  | -0.1012<br>(0.1207)    |                  |
| poor         | 0.3887***<br>(0.1305)  |                  |
| nearpoor     | -0.1142<br>(0.1788)    |                  |

|             |                       |                              |
|-------------|-----------------------|------------------------------|
| middleinc   | 0.0508<br>(0.1515)    |                              |
| highinc     | 0.2635<br>(0.2143)    |                              |
| _bs_1       |                       | 1.6099e+10**<br>(7.8086e+09) |
| _bs_2       |                       | 0.0940**<br>(0.0451)         |
| _cons       | 7.9736***<br>(0.1739) |                              |
| No. of Obs. | 3772.0000             | 3772.0000                    |
| R-Squared   |                       |                              |

|              | (1)<br>totalexp<br>Coef./std.errors | (2)<br>Coef./std.errors |
|--------------|-------------------------------------|-------------------------|
| main         |                                     |                         |
| overweight   | 0.0525<br>(0.0649)                  |                         |
| obese        | 0.2427***<br>(0.0672)               |                         |
| age3544      | 0.7426**<br>(0.3408)                |                         |
| age4554      | 0.4260<br>(0.2927)                  |                         |
| age5564      | 0.3708<br>(0.2706)                  |                         |
| age6574      | -0.0144<br>(0.2578)                 |                         |
| age75plus    | 0.0292<br>(0.2605)                  |                         |
| female       | 0.0193<br>(0.0550)                  |                         |
| smoker       | -0.0896<br>(0.0920)                 |                         |
| married      | -0.1957***<br>(0.0594)              |                         |
| black        | -0.1140<br>(0.0940)                 |                         |
| amind        | 0.0023<br>(0.2793)                  |                         |
| asian        | -0.3765***<br>(0.1431)              |                         |
| othrace      | -0.1767<br>(0.1891)                 |                         |
| midwest      | 0.0645<br>(0.0840)                  |                         |
| south        | 0.0586<br>(0.0758)                  |                         |
| west         | 0.0274<br>(0.0851)                  |                         |
| lesshischool | -0.0003<br>(0.0829)                 |                         |
| collegeplus  | -0.0374<br>(0.0619)                 |                         |
| poor         | 0.0916<br>(0.1034)                  |                         |
| nearpoor     | -0.0596<br>(0.1333)                 |                         |

|             |                       |                               |
|-------------|-----------------------|-------------------------------|
| middleinc   | -0.0006<br>(0.0835)   |                               |
| highinc     | 0.1151<br>(0.0833)    |                               |
| _bs_1       |                       | 4.0373e+10***<br>(1.2675e+10) |
| _bs_2       |                       | 0.0824***<br>(0.0254)         |
| _cons       | 9.0896***<br>(0.2845) |                               |
| No. of Obs. | 4547.0000             | 4547.0000                     |
| R-Squared   |                       |                               |

|              | (1)<br>outpatient<br>Coef./std.errors | (2)<br>Coef./std.errors |
|--------------|---------------------------------------|-------------------------|
| main         |                                       |                         |
| overweight   | 0.2732**<br>(0.1136)                  |                         |
| obese        | 0.3974***<br>(0.1189)                 |                         |
| unins        | -0.9566***<br>(0.1349)                |                         |
| medicaid     | 0.0001<br>(0.1566)                    |                         |
| medicare     | 0.9734*<br>(0.5011)                   |                         |
| female       | 0.8228***<br>(0.0972)                 |                         |
| smoker       | 0.2134<br>(0.1394)                    |                         |
| married      | 0.2668**<br>(0.1102)                  |                         |
| black        | -0.6211***<br>(0.1409)                |                         |
| amind        | -0.7030<br>(0.5390)                   |                         |
| asian        | -0.0436<br>(0.1950)                   |                         |
| othrace      | -0.0841<br>(0.2513)                   |                         |
| midwest      | -0.1462<br>(0.1556)                   |                         |
| south        | -0.3264**<br>(0.1414)                 |                         |
| west         | 0.0971<br>(0.1498)                    |                         |
| lesshischool | -0.2327<br>(0.1586)                   |                         |
| collegeplus  | 0.3211***<br>(0.1145)                 |                         |
| poor         | -0.0273<br>(0.1922)                   |                         |
| nearpoor     | -0.2732<br>(0.2569)                   |                         |
| middleinc    | -0.3138*<br>(0.1632)                  |                         |
| highinc      | -0.0604<br>(0.1680)                   |                         |

|             |                       |                               |
|-------------|-----------------------|-------------------------------|
| _bs_1       |                       | 5.2670e+09***<br>(1.5830e+09) |
| _bs_2       |                       | 0.1003***<br>(0.0294)         |
| _cons       | 6.1753***<br>(0.1990) |                               |
| No. of Obs. | 6003.0000             | 6003.0000                     |
| R-Squared   |                       |                               |

|              | (1)                    | (2)              |
|--------------|------------------------|------------------|
|              | outpatient             |                  |
|              | Coef./std.errors       | Coef./std.errors |
| main         |                        |                  |
| overweight   | 0.0779<br>(0.1326)     |                  |
| obese        | 0.4582***<br>(0.1314)  |                  |
| unins        | -0.5075***<br>(0.1613) |                  |
| medicaid     | 0.0108<br>(0.2027)     |                  |
| medicare     | 1.6019***<br>(0.3711)  |                  |
| female       | 0.7064***<br>(0.1024)  |                  |
| smoker       | -0.2132<br>(0.1454)    |                  |
| married      | -0.2257**<br>(0.1147)  |                  |
| black        | -0.4649***<br>(0.1649) |                  |
| amind        | 0.2103<br>(0.5218)     |                  |
| asian        | -0.3517*<br>(0.2039)   |                  |
| othrace      | -0.2089<br>(0.3165)    |                  |
| midwest      | 0.1593<br>(0.1711)     |                  |
| south        | 0.0458<br>(0.1522)     |                  |
| west         | 0.1935<br>(0.1630)     |                  |
| lesshischool | -0.4745***<br>(0.1841) |                  |
| collegeplus  | 0.0779<br>(0.1331)     |                  |
| poor         | -0.0432<br>(0.2255)    |                  |
| nearpoor     | 0.0040<br>(0.3131)     |                  |
| middleinc    | 0.2751<br>(0.1878)     |                  |
| highinc      | 0.6407***<br>(0.1836)  |                  |

|             |                       |                               |
|-------------|-----------------------|-------------------------------|
| _bs_1       |                       | 7.0436e+09***<br>(2.2538e+09) |
| _bs_2       |                       | 0.1610***<br>(0.0484)         |
| _cons       | 6.2584***<br>(0.2698) |                               |
| No. of Obs. | 3609.0000             | 3609.0000                     |
| R-Squared   |                       |                               |



|              | (1)<br>outpatient<br>Coef./std.errors | (2)<br>Coef./std.errors |
|--------------|---------------------------------------|-------------------------|
| main         |                                       |                         |
| overweight   | 0.1240<br>(0.1673)                    |                         |
| obese        | 0.3253*<br>(0.1664)                   |                         |
| unins        | -0.9530***<br>(0.2152)                |                         |
| medicaid     | -0.2383<br>(0.2613)                   |                         |
| medicare     | 1.2667***<br>(0.3387)                 |                         |
| female       | 0.4565***<br>(0.1340)                 |                         |
| smoker       | -0.2534<br>(0.1827)                   |                         |
| married      | -0.0520<br>(0.1542)                   |                         |
| black        | -0.0828<br>(0.2085)                   |                         |
| amind        | 0.5862<br>(0.7113)                    |                         |
| asian        | -0.3696<br>(0.2742)                   |                         |
| othrace      | 0.3207<br>(0.4313)                    |                         |
| midwest      | -0.2544<br>(0.2192)                   |                         |
| south        | -0.1071<br>(0.1939)                   |                         |
| west         | -0.1650<br>(0.2084)                   |                         |
| lesshischool | -0.4512*<br>(0.2412)                  |                         |
| collegeplus  | 0.4859***<br>(0.1538)                 |                         |
| poor         | -0.1215<br>(0.3087)                   |                         |
| nearpoor     | -0.4420<br>(0.4456)                   |                         |
| middleinc    | -0.2887<br>(0.2507)                   |                         |
| highinc      | -0.2476<br>(0.2451)                   |                         |

|             |                       |                              |
|-------------|-----------------------|------------------------------|
| _bs_1       |                       | 7.9785e+09**<br>(3.6677e+09) |
| _bs_2       |                       | 0.1204**<br>(0.0560)         |
| _cons       | 7.2417***<br>(0.3458) |                              |
| No. of Obs. | 3652.0000             | 3652.0000                    |
| R-Squared   |                       |                              |

|              | (1)<br>outpatient<br>Coef./std.errors | (2)<br>Coef./std.errors |
|--------------|---------------------------------------|-------------------------|
| main         |                                       |                         |
| overweight   | 0.0814<br>(0.1102)                    |                         |
| obese        | 0.3615***<br>(0.1125)                 |                         |
| unins        | -0.1476<br>(0.1516)                   |                         |
| medicaid     | 0.1723<br>(0.1612)                    |                         |
| medicare     | 0.6900***<br>(0.1558)                 |                         |
| female       | 0.2237**<br>(0.0889)                  |                         |
| smoker       | -0.0401<br>(0.1196)                   |                         |
| married      | 0.2396**<br>(0.0955)                  |                         |
| black        | -0.0735<br>(0.1367)                   |                         |
| amind        | -0.2792<br>(0.4199)                   |                         |
| asian        | -0.4676**<br>(0.2144)                 |                         |
| othrace      | -0.1725<br>(0.2849)                   |                         |
| midwest      | 0.0863<br>(0.1380)                    |                         |
| south        | -0.0453<br>(0.1256)                   |                         |
| west         | 0.0950<br>(0.1380)                    |                         |
| lesshischool | -0.1523<br>(0.1519)                   |                         |
| collegeplus  | 0.3159***<br>(0.0973)                 |                         |
| poor         | 0.3571*<br>(0.1931)                   |                         |
| nearpoor     | 0.0472<br>(0.2723)                    |                         |
| middleinc    | 0.2758<br>(0.1680)                    |                         |
| highinc      | 0.5662***<br>(0.1639)                 |                         |

|             |                       |                               |
|-------------|-----------------------|-------------------------------|
| _bs_1       |                       | 1.1276e+10***<br>(3.7570e+09) |
| _bs_2       |                       | 0.1287***<br>(0.0403)         |
| _cons       | 6.6694***<br>(0.2215) |                               |
| No. of Obs. | 3353.0000             | 3353.0000                     |
| R-Squared   |                       |                               |

|              | (1)<br>outpatient<br>Coef./std.errors | (2)<br>Coef./std.errors    |
|--------------|---------------------------------------|----------------------------|
| main         |                                       |                            |
| overweight   | -0.0397<br>(0.1078)                   |                            |
| obese        | 0.0096<br>(0.1072)                    |                            |
| female       | -0.1143<br>(0.0864)                   |                            |
| smoker       | -0.1523<br>(0.1377)                   |                            |
| married      | -0.2737***<br>(0.0942)                |                            |
| black        | -0.2027<br>(0.1587)                   |                            |
| amind        | -0.2387<br>(0.5527)                   |                            |
| asian        | -0.1711<br>(0.2175)                   |                            |
| othrace      | -0.4024<br>(0.2864)                   |                            |
| midwest      | 0.1467<br>(0.1434)                    |                            |
| south        | 0.0346<br>(0.1297)                    |                            |
| west         | 0.0584<br>(0.1414)                    |                            |
| lesshischool | -0.2208<br>(0.1422)                   |                            |
| collegeplus  | 0.1014<br>(0.1017)                    |                            |
| poor         | 0.0825<br>(0.1972)                    |                            |
| nearpoor     | 0.1197<br>(0.2458)                    |                            |
| middleinc    | 0.2112<br>(0.1469)                    |                            |
| highinc      | 0.4618***<br>(0.1417)                 |                            |
| _bs_1        |                                       | 2.5581e+08<br>(3.2787e+09) |
| _bs_2        |                                       | 0.0033<br>(0.0427)         |
| _cons        | 7.8640***<br>(0.2055)                 |                            |

---

|             |           |           |
|-------------|-----------|-----------|
| No. of Obs. | 2309.0000 | 2309.0000 |
| R-Squared   |           |           |

---

|              | (1)<br>outpatient<br>Coef./std.errors | (2)<br>Coef./std.errors    |
|--------------|---------------------------------------|----------------------------|
| main         |                                       |                            |
| overweight   | 0.1120<br>(0.1098)                    |                            |
| obese        | 0.0114<br>(0.1299)                    |                            |
| female       | -0.1326<br>(0.1066)                   |                            |
| smoker       | -0.4328<br>(0.2793)                   |                            |
| married      | 0.0125<br>(0.1114)                    |                            |
| black        | -0.3315*<br>(0.1920)                  |                            |
| amind        | -0.1824<br>(0.5791)                   |                            |
| asian        | -0.8516***<br>(0.2539)                |                            |
| othrace      | -0.3824<br>(0.5896)                   |                            |
| midwest      | -0.0316<br>(0.1447)                   |                            |
| south        | -0.0780<br>(0.1314)                   |                            |
| west         | 0.0907<br>(0.1516)                    |                            |
| lesshischool | -0.4838***<br>(0.1445)                |                            |
| collegeplus  | -0.0459<br>(0.1109)                   |                            |
| poor         | -0.0026<br>(0.1881)                   |                            |
| nearpoor     | -0.3634<br>(0.2343)                   |                            |
| middleinc    | -0.0368<br>(0.1461)                   |                            |
| highinc      | -0.0242<br>(0.1479)                   |                            |
| _bs_1        |                                       | 1.3374e+08<br>(1.5634e+09) |
| _bs_2        |                                       | 0.0024<br>(0.0281)         |
| _cons        | 8.2800***<br>(0.1885)                 |                            |

---

|             |           |           |
|-------------|-----------|-----------|
| No. of Obs. | 1640.0000 | 1640.0000 |
| R-Squared   |           |           |

---



|              | (1)<br>outpatient<br>Coef./std.errors | (2)<br>Coef./std.errors |
|--------------|---------------------------------------|-------------------------|
| main         |                                       |                         |
| overweight   | 0.1353**<br>(0.0592)                  |                         |
| obese        | 0.2906***<br>(0.0616)                 |                         |
| age3544      | 0.3122***<br>(0.0789)                 |                         |
| age4554      | 0.6911***<br>(0.0766)                 |                         |
| age5564      | 0.9345***<br>(0.0768)                 |                         |
| age6574      | 1.1596***<br>(0.0810)                 |                         |
| age75plus    | 1.2920***<br>(0.0933)                 |                         |
| female       | 0.3503***<br>(0.0495)                 |                         |
| smoker       | -0.0543<br>(0.0741)                   |                         |
| married      | 0.0335<br>(0.0529)                    |                         |
| black        | -0.2975***<br>(0.0792)                |                         |
| amind        | -0.1784<br>(0.3048)                   |                         |
| asian        | -0.3262***<br>(0.1051)                |                         |
| othrace      | -0.1928<br>(0.1524)                   |                         |
| midwest      | 0.0471<br>(0.0783)                    |                         |
| south        | -0.0669<br>(0.0703)                   |                         |
| west         | 0.1164<br>(0.0765)                    |                         |
| lesshischool | -0.2284***<br>(0.0862)                |                         |
| collegeplus  | 0.2238***<br>(0.0573)                 |                         |
| poor         | 0.1383<br>(0.1098)                    |                         |
| nearpoor     | -0.0767<br>(0.1494)                   |                         |

|             |                       |                               |
|-------------|-----------------------|-------------------------------|
| middleinc   | 0.0172<br>(0.0870)    |                               |
| highinc     | 0.1623*<br>(0.0849)   |                               |
| _bs_1       |                       | 3.3030e+10***<br>(7.2952e+09) |
| _bs_2       |                       | 0.0899***<br>(0.0196)         |
| _cons       | 6.3308***<br>(0.1194) |                               |
| No. of Obs. | 17196.0000            | 17196.0000                    |
| R-Squared   |                       |                               |

|              | (1)<br>outpatient<br>Coef./std.errors | (2)<br>Coef./std.errors |
|--------------|---------------------------------------|-------------------------|
| main         |                                       |                         |
| overweight   | 0.0914<br>(0.0702)                    |                         |
| obese        | 0.2788***<br>(0.0743)                 |                         |
| age3544      | 0.2914***<br>(0.0890)                 |                         |
| age4554      | 0.6493***<br>(0.0871)                 |                         |
| age5564      | 0.9161***<br>(0.0886)                 |                         |
| age6574      | 1.1598***<br>(0.1097)                 |                         |
| age75plus    | 1.4980***<br>(0.1332)                 |                         |
| female       | 0.4508***<br>(0.0590)                 |                         |
| smoker       | -0.0250<br>(0.0949)                   |                         |
| married      | 0.1340**<br>(0.0632)                  |                         |
| black        | -0.1998**<br>(0.1005)                 |                         |
| amind        | -0.0004<br>(0.4249)                   |                         |
| asian        | -0.4189***<br>(0.1199)                |                         |
| othrace      | -0.0554<br>(0.1835)                   |                         |
| midwest      | 0.0063<br>(0.0931)                    |                         |
| south        | -0.1456*<br>(0.0845)                  |                         |
| west         | 0.0890<br>(0.0924)                    |                         |
| lesshischool | -0.3231***<br>(0.1217)                |                         |
| collegeplus  | 0.3017***<br>(0.0682)                 |                         |
| poor         | 0.0794<br>(0.1856)                    |                         |
| nearpoor     | -0.0864<br>(0.2517)                   |                         |

|             |                       |                               |
|-------------|-----------------------|-------------------------------|
| middleinc   | 0.0703<br>(0.1182)    |                               |
| highinc     | 0.1840<br>(0.1152)    |                               |
| _bs_1       |                       | 2.1914e+10***<br>(5.6710e+09) |
| _bs_2       |                       | 0.0840***<br>(0.0216)         |
| _cons       | 6.1695***<br>(0.1542) |                               |
| No. of Obs. | 11222.0000            | 11222.0000                    |
| R-Squared   |                       |                               |

|              | (1)<br>outpatient<br>Coef./std.errors | (2)<br>Coef./std.errors |
|--------------|---------------------------------------|-------------------------|
| main         |                                       |                         |
| overweight   | 0.4025***<br>(0.1269)                 |                         |
| obese        | 0.5201***<br>(0.1214)                 |                         |
| age3544      | 0.2521*<br>(0.1517)                   |                         |
| age4554      | 0.6434***<br>(0.1531)                 |                         |
| age5564      | 0.9584***<br>(0.1513)                 |                         |
| age6574      | 1.3801***<br>(0.1996)                 |                         |
| age75plus    | 0.7516***<br>(0.1976)                 |                         |
| female       | 0.2752**<br>(0.1093)                  |                         |
| smoker       | -0.0475<br>(0.1164)                   |                         |
| married      | -0.1388<br>(0.1201)                   |                         |
| black        | -0.5746***<br>(0.1295)                |                         |
| amind        | -0.0833<br>(0.5225)                   |                         |
| asian        | 0.0741<br>(0.2181)                    |                         |
| othrace      | -0.3856<br>(0.2546)                   |                         |
| midwest      | 0.0745<br>(0.1535)                    |                         |
| south        | -0.0753<br>(0.1459)                   |                         |
| west         | -0.0753<br>(0.1415)                   |                         |
| lesshischool | -0.0932<br>(0.1251)                   |                         |
| collegeplus  | 0.1167<br>(0.1235)                    |                         |
| poor         | 0.0804<br>(0.1364)                    |                         |
| nearpoor     | -0.0692<br>(0.1871)                   |                         |

|             |                       |                               |
|-------------|-----------------------|-------------------------------|
| middleinc   | -0.1116<br>(0.1573)   |                               |
| highinc     | 0.0108<br>(0.2241)    |                               |
| _bs_1       |                       | 6.6961e+09***<br>(1.4095e+09) |
| _bs_2       |                       | 0.1731***<br>(0.0340)         |
| _cons       | 6.4237***<br>(0.1912) |                               |
| No. of Obs. | 3772.0000             | 3772.0000                     |
| R-Squared   |                       |                               |

|              | (1)<br>outpatient<br>Coef./std.errors | (2)<br>Coef./std.errors |
|--------------|---------------------------------------|-------------------------|
| main         |                                       |                         |
| overweight   | 0.0426<br>(0.0739)                    |                         |
| obese        | 0.0385<br>(0.0772)                    |                         |
| age3544      | 0.7420*<br>(0.3859)                   |                         |
| age4554      | 0.5591*<br>(0.3337)                   |                         |
| age5564      | 0.5462*<br>(0.3084)                   |                         |
| age6574      | 0.1453<br>(0.2927)                    |                         |
| age75plus    | 0.1920<br>(0.2965)                    |                         |
| female       | -0.0721<br>(0.0619)                   |                         |
| smoker       | -0.2203**<br>(0.1024)                 |                         |
| married      | -0.1450**<br>(0.0662)                 |                         |
| black        | -0.2549**<br>(0.1083)                 |                         |
| amind        | -0.3217<br>(0.3166)                   |                         |
| asian        | -0.4647***<br>(0.1628)                |                         |
| othrace      | -0.3868*<br>(0.2156)                  |                         |
| midwest      | 0.0233<br>(0.0958)                    |                         |
| south        | -0.0255<br>(0.0859)                   |                         |
| west         | 0.0477<br>(0.0974)                    |                         |
| lesshischool | -0.3204***<br>(0.0933)                |                         |
| collegeplus  | 0.0451<br>(0.0705)                    |                         |
| poor         | -0.0295<br>(0.1175)                   |                         |
| nearpoor     | -0.0872<br>(0.1504)                   |                         |

|             |           |              |
|-------------|-----------|--------------|
| middleinc   | 0.1655*   |              |
|             | (0.0958)  |              |
| highinc     | 0.3041*** |              |
|             | (0.0950)  |              |
| _bs_1       |           | 1.8843e+09   |
|             |           | (3.8331e+09) |
| _bs_2       |           | 0.0124       |
|             |           | (0.0251)     |
| _cons       | 7.8290*** |              |
|             | (0.3253)  |              |
| <hr/>       |           |              |
| No. of Obs. | 4547.0000 | 4547.0000    |
| R-Squared   |           |              |
| <hr/>       |           |              |



|              | (1)<br>outpatient<br>Coef./std.errors | (2)<br>Coef./std.errors |
|--------------|---------------------------------------|-------------------------|
| main         |                                       |                         |
| overweight   | 0.2732**<br>(0.1136)                  |                         |
| obese        | 0.3974***<br>(0.1189)                 |                         |
| unins        | -0.9566***<br>(0.1349)                |                         |
| medicaid     | 0.0001<br>(0.1566)                    |                         |
| medicare     | 0.9734*<br>(0.5011)                   |                         |
| female       | 0.8228***<br>(0.0972)                 |                         |
| smoker       | 0.2134<br>(0.1394)                    |                         |
| married      | 0.2668**<br>(0.1102)                  |                         |
| black        | -0.6211***<br>(0.1409)                |                         |
| amind        | -0.7030<br>(0.5390)                   |                         |
| asian        | -0.0436<br>(0.1950)                   |                         |
| othrace      | -0.0841<br>(0.2513)                   |                         |
| midwest      | -0.1462<br>(0.1556)                   |                         |
| south        | -0.3264**<br>(0.1414)                 |                         |
| west         | 0.0971<br>(0.1498)                    |                         |
| lesshischool | -0.2327<br>(0.1586)                   |                         |
| collegeplus  | 0.3211***<br>(0.1145)                 |                         |
| poor         | -0.0273<br>(0.1922)                   |                         |
| nearpoor     | -0.2732<br>(0.2569)                   |                         |
| middleinc    | -0.3138*<br>(0.1632)                  |                         |
| highinc      | -0.0604<br>(0.1680)                   |                         |

|             |                       |                              |
|-------------|-----------------------|------------------------------|
| _bs_1       |                       | 3.8392e+09**<br>(1.7756e+09) |
| _bs_2       |                       | 0.0731**<br>(0.0325)         |
| _cons       | 6.1753***<br>(0.1990) |                              |
| No. of Obs. | 6003.0000             | 6003.0000                    |
| R-Squared   |                       |                              |

|              | (1)<br>outpatient<br>Coef./std.errors | (2)<br>Coef./std.errors |
|--------------|---------------------------------------|-------------------------|
| main         |                                       |                         |
| overweight   | 0.0779<br>(0.1326)                    |                         |
| obese        | 0.4582***<br>(0.1314)                 |                         |
| unins        | -0.5075***<br>(0.1613)                |                         |
| medicaid     | 0.0108<br>(0.2027)                    |                         |
| medicare     | 1.6019***<br>(0.3711)                 |                         |
| female       | 0.7064***<br>(0.1024)                 |                         |
| smoker       | -0.2132<br>(0.1454)                   |                         |
| married      | -0.2257**<br>(0.1147)                 |                         |
| black        | -0.4649***<br>(0.1649)                |                         |
| amind        | 0.2103<br>(0.5218)                    |                         |
| asian        | -0.3517*<br>(0.2039)                  |                         |
| othrace      | -0.2089<br>(0.3165)                   |                         |
| midwest      | 0.1593<br>(0.1711)                    |                         |
| south        | 0.0458<br>(0.1522)                    |                         |
| west         | 0.1935<br>(0.1630)                    |                         |
| lesshischool | -0.4745***<br>(0.1841)                |                         |
| collegeplus  | 0.0779<br>(0.1331)                    |                         |
| poor         | -0.0432<br>(0.2255)                   |                         |
| nearpoor     | 0.0040<br>(0.3131)                    |                         |
| middleinc    | 0.2751<br>(0.1878)                    |                         |
| highinc      | 0.6407***<br>(0.1836)                 |                         |

|             |                       |                            |
|-------------|-----------------------|----------------------------|
| _bs_1       |                       | 8.2432e+08<br>(1.4789e+09) |
| _bs_2       |                       | 0.0188<br>(0.0333)         |
| _cons       | 6.2584***<br>(0.2698) |                            |
| No. of Obs. | 3609.0000             | 3609.0000                  |
| R-Squared   |                       |                            |

|              | (1)<br>outpatient<br>Coef./std.errors | (2)<br>Coef./std.errors |
|--------------|---------------------------------------|-------------------------|
| main         |                                       |                         |
| overweight   | 0.1240<br>(0.1673)                    |                         |
| obese        | 0.3253*<br>(0.1664)                   |                         |
| unins        | -0.9530***<br>(0.2152)                |                         |
| medicaid     | -0.2383<br>(0.2613)                   |                         |
| medicare     | 1.2667***<br>(0.3387)                 |                         |
| female       | 0.4565***<br>(0.1340)                 |                         |
| smoker       | -0.2534<br>(0.1827)                   |                         |
| married      | -0.0520<br>(0.1542)                   |                         |
| black        | -0.0828<br>(0.2085)                   |                         |
| amind        | 0.5862<br>(0.7113)                    |                         |
| asian        | -0.3696<br>(0.2742)                   |                         |
| othrace      | 0.3207<br>(0.4313)                    |                         |
| midwest      | -0.2544<br>(0.2192)                   |                         |
| south        | -0.1071<br>(0.1939)                   |                         |
| west         | -0.1650<br>(0.2084)                   |                         |
| lesshischool | -0.4512*<br>(0.2412)                  |                         |
| collegeplus  | 0.4859***<br>(0.1538)                 |                         |
| poor         | -0.1215<br>(0.3087)                   |                         |
| nearpoor     | -0.4420<br>(0.4456)                   |                         |
| middleinc    | -0.2887<br>(0.2507)                   |                         |
| highinc      | -0.2476<br>(0.2451)                   |                         |

|             |                       |                            |
|-------------|-----------------------|----------------------------|
| _bs_1       |                       | 2.5172e+09<br>(3.2886e+09) |
| _bs_2       |                       | 0.0380<br>(0.0500)         |
| _cons       | 7.2417***<br>(0.3458) |                            |
| No. of Obs. | 3652.0000             | 3652.0000                  |
| R-Squared   |                       |                            |

|              | (1)<br>outpatient<br>Coef./std.errors | (2)<br>Coef./std.errors |
|--------------|---------------------------------------|-------------------------|
| main         |                                       |                         |
| overweight   | 0.0814<br>(0.1102)                    |                         |
| obese        | 0.3615***<br>(0.1125)                 |                         |
| unins        | -0.1476<br>(0.1516)                   |                         |
| medicaid     | 0.1723<br>(0.1612)                    |                         |
| medicare     | 0.6900***<br>(0.1558)                 |                         |
| female       | 0.2237**<br>(0.0889)                  |                         |
| smoker       | -0.0401<br>(0.1196)                   |                         |
| married      | 0.2396**<br>(0.0955)                  |                         |
| black        | -0.0735<br>(0.1367)                   |                         |
| amind        | -0.2792<br>(0.4199)                   |                         |
| asian        | -0.4676**<br>(0.2144)                 |                         |
| othrace      | -0.1725<br>(0.2849)                   |                         |
| midwest      | 0.0863<br>(0.1380)                    |                         |
| south        | -0.0453<br>(0.1256)                   |                         |
| west         | 0.0950<br>(0.1380)                    |                         |
| lesshischool | -0.1523<br>(0.1519)                   |                         |
| collegeplus  | 0.3159***<br>(0.0973)                 |                         |
| poor         | 0.3571*<br>(0.1931)                   |                         |
| nearpoor     | 0.0472<br>(0.2723)                    |                         |
| middleinc    | 0.2758<br>(0.1680)                    |                         |
| highinc      | 0.5662***<br>(0.1639)                 |                         |

|             |           |              |
|-------------|-----------|--------------|
| _bs_1       |           | 2.3006e+09   |
|             |           | (3.3193e+09) |
| _bs_2       |           | 0.0263       |
|             |           | (0.0380)     |
| _cons       | 6.6694*** |              |
|             | (0.2215)  |              |
| <hr/>       |           |              |
| No. of Obs. | 3353.0000 | 3353.0000    |
| R-Squared   |           |              |
| <hr/>       |           |              |



|              | (1)<br>outpatient<br>Coef./std.errors | (2)<br>Coef./std.errors     |
|--------------|---------------------------------------|-----------------------------|
| main         |                                       |                             |
| overweight   | -0.0397<br>(0.1078)                   |                             |
| obese        | 0.0096<br>(0.1072)                    |                             |
| female       | -0.1143<br>(0.0864)                   |                             |
| smoker       | -0.1523<br>(0.1377)                   |                             |
| married      | -0.2737***<br>(0.0942)                |                             |
| black        | -0.2027<br>(0.1587)                   |                             |
| amind        | -0.2387<br>(0.5527)                   |                             |
| asian        | -0.1711<br>(0.2175)                   |                             |
| othrace      | -0.4024<br>(0.2864)                   |                             |
| midwest      | 0.1467<br>(0.1434)                    |                             |
| south        | 0.0346<br>(0.1297)                    |                             |
| west         | 0.0584<br>(0.1414)                    |                             |
| lesshischool | -0.2208<br>(0.1422)                   |                             |
| collegeplus  | 0.1014<br>(0.1017)                    |                             |
| poor         | 0.0825<br>(0.1972)                    |                             |
| nearpoor     | 0.1197<br>(0.2458)                    |                             |
| middleinc    | 0.2112<br>(0.1469)                    |                             |
| highinc      | 0.4618***<br>(0.1417)                 |                             |
| _bs_1        |                                       | -1.0594e+09<br>(3.1199e+09) |
| _bs_2        |                                       | -0.0138<br>(0.0404)         |
| _cons        | 7.8640***<br>(0.2055)                 |                             |

---

|             |           |           |
|-------------|-----------|-----------|
| No. of Obs. | 2309.0000 | 2309.0000 |
| R-Squared   |           |           |

---

|              | (1)<br>outpatient<br>Coef./std.errors | (2)<br>Coef./std.errors    |
|--------------|---------------------------------------|----------------------------|
| main         |                                       |                            |
| overweight   | 0.1120<br>(0.1098)                    |                            |
| obese        | 0.0114<br>(0.1299)                    |                            |
| female       | -0.1326<br>(0.1066)                   |                            |
| smoker       | -0.4328<br>(0.2793)                   |                            |
| married      | 0.0125<br>(0.1114)                    |                            |
| black        | -0.3315*<br>(0.1920)                  |                            |
| amind        | -0.1824<br>(0.5791)                   |                            |
| asian        | -0.8516***<br>(0.2539)                |                            |
| othrace      | -0.3824<br>(0.5896)                   |                            |
| midwest      | -0.0316<br>(0.1447)                   |                            |
| south        | -0.0780<br>(0.1314)                   |                            |
| west         | 0.0907<br>(0.1516)                    |                            |
| lesshischool | -0.4838***<br>(0.1445)                |                            |
| collegeplus  | -0.0459<br>(0.1109)                   |                            |
| poor         | -0.0026<br>(0.1881)                   |                            |
| nearpoor     | -0.3634<br>(0.2343)                   |                            |
| middleinc    | -0.0368<br>(0.1461)                   |                            |
| highinc      | -0.0242<br>(0.1479)                   |                            |
| _bs_1        |                                       | 2.3986e+09<br>(3.0112e+09) |
| _bs_2        |                                       | 0.0427<br>(0.0534)         |
| _cons        | 8.2800***<br>(0.1885)                 |                            |

---

|             |           |           |
|-------------|-----------|-----------|
| No. of Obs. | 1640.0000 | 1640.0000 |
| R-Squared   |           |           |

---

|              | (1)<br>outpatient<br>Coef./std.errors | (2)<br>Coef./std.errors |
|--------------|---------------------------------------|-------------------------|
| main         |                                       |                         |
| overweight   | 0.1353**<br>(0.0592)                  |                         |
| obese        | 0.2906***<br>(0.0616)                 |                         |
| age3544      | 0.3122***<br>(0.0789)                 |                         |
| age4554      | 0.6911***<br>(0.0766)                 |                         |
| age5564      | 0.9345***<br>(0.0768)                 |                         |
| age6574      | 1.1596***<br>(0.0810)                 |                         |
| age75plus    | 1.2920***<br>(0.0933)                 |                         |
| female       | 0.3503***<br>(0.0495)                 |                         |
| smoker       | -0.0543<br>(0.0741)                   |                         |
| married      | 0.0335<br>(0.0529)                    |                         |
| black        | -0.2975***<br>(0.0792)                |                         |
| amind        | -0.1784<br>(0.3048)                   |                         |
| asian        | -0.3262***<br>(0.1051)                |                         |
| othrace      | -0.1928<br>(0.1524)                   |                         |
| midwest      | 0.0471<br>(0.0783)                    |                         |
| south        | -0.0669<br>(0.0703)                   |                         |
| west         | 0.1164<br>(0.0765)                    |                         |
| lesshischool | -0.2284***<br>(0.0862)                |                         |
| collegeplus  | 0.2238***<br>(0.0573)                 |                         |
| poor         | 0.1383<br>(0.1098)                    |                         |
| nearpoor     | -0.0767<br>(0.1494)                   |                         |

|             |                       |                             |
|-------------|-----------------------|-----------------------------|
| middleinc   | 0.0172<br>(0.0870)    |                             |
| highinc     | 0.1623*<br>(0.0849)   |                             |
| _bs_1       |                       | 1.5871e+10*<br>(8.2535e+09) |
| _bs_2       |                       | 0.0432*<br>(0.0221)         |
| _cons       | 6.3308***<br>(0.1194) |                             |
| No. of Obs. | 17196.0000            | 17196.0000                  |
| R-Squared   |                       |                             |

|              | (1)<br>outpatient<br>Coef./std.errors | (2)<br>Coef./std.errors |
|--------------|---------------------------------------|-------------------------|
| main         |                                       |                         |
| overweight   | 0.0914<br>(0.0702)                    |                         |
| obese        | 0.2788***<br>(0.0743)                 |                         |
| age3544      | 0.2914***<br>(0.0890)                 |                         |
| age4554      | 0.6493***<br>(0.0871)                 |                         |
| age5564      | 0.9161***<br>(0.0886)                 |                         |
| age6574      | 1.1598***<br>(0.1097)                 |                         |
| age75plus    | 1.4980***<br>(0.1332)                 |                         |
| female       | 0.4508***<br>(0.0590)                 |                         |
| smoker       | -0.0250<br>(0.0949)                   |                         |
| married      | 0.1340**<br>(0.0632)                  |                         |
| black        | -0.1998**<br>(0.1005)                 |                         |
| amind        | -0.0004<br>(0.4249)                   |                         |
| asian        | -0.4189***<br>(0.1199)                |                         |
| othrace      | -0.0554<br>(0.1835)                   |                         |
| midwest      | 0.0063<br>(0.0931)                    |                         |
| south        | -0.1456*<br>(0.0845)                  |                         |
| west         | 0.0890<br>(0.0924)                    |                         |
| lesshischool | -0.3231***<br>(0.1217)                |                         |
| collegeplus  | 0.3017***<br>(0.0682)                 |                         |
| poor         | 0.0794<br>(0.1856)                    |                         |
| nearpoor     | -0.0864<br>(0.2517)                   |                         |

|             |                       |                            |
|-------------|-----------------------|----------------------------|
| middleinc   | 0.0703<br>(0.1182)    |                            |
| highinc     | 0.1840<br>(0.1152)    |                            |
| _bs_1       |                       | 7.7127e+09<br>(6.7238e+09) |
| _bs_2       |                       | 0.0296<br>(0.0256)         |
| _cons       | 6.1695***<br>(0.1542) |                            |
| No. of Obs. | 11222.0000            | 11222.0000                 |
| R-Squared   |                       |                            |



|              | (1)<br>outpatient<br>Coef./std.errors | (2)<br>Coef./std.errors |
|--------------|---------------------------------------|-------------------------|
| main         |                                       |                         |
| overweight   | 0.4025***<br>(0.1269)                 |                         |
| obese        | 0.5201***<br>(0.1214)                 |                         |
| age3544      | 0.2521*<br>(0.1517)                   |                         |
| age4554      | 0.6434***<br>(0.1531)                 |                         |
| age5564      | 0.9584***<br>(0.1513)                 |                         |
| age6574      | 1.3801***<br>(0.1996)                 |                         |
| age75plus    | 0.7516***<br>(0.1976)                 |                         |
| female       | 0.2752**<br>(0.1093)                  |                         |
| smoker       | -0.0475<br>(0.1164)                   |                         |
| married      | -0.1388<br>(0.1201)                   |                         |
| black        | -0.5746***<br>(0.1295)                |                         |
| amind        | -0.0833<br>(0.5225)                   |                         |
| asian        | 0.0741<br>(0.2181)                    |                         |
| othrace      | -0.3856<br>(0.2546)                   |                         |
| midwest      | 0.0745<br>(0.1535)                    |                         |
| south        | -0.0753<br>(0.1459)                   |                         |
| west         | -0.0753<br>(0.1415)                   |                         |
| lesshischool | -0.0932<br>(0.1251)                   |                         |
| collegeplus  | 0.1167<br>(0.1235)                    |                         |
| poor         | 0.0804<br>(0.1364)                    |                         |
| nearpoor     | -0.0692<br>(0.1871)                   |                         |

|             |                       |                              |
|-------------|-----------------------|------------------------------|
| middleinc   | -0.1116<br>(0.1573)   |                              |
| highinc     | 0.0108<br>(0.2241)    |                              |
| _bs_1       |                       | 4.2225e+09**<br>(1.6553e+09) |
| _bs_2       |                       | 0.1091***<br>(0.0408)        |
| _cons       | 6.4237***<br>(0.1912) |                              |
| No. of Obs. | 3772.0000             | 3772.0000                    |
| R-Squared   |                       |                              |

|              | (1)<br>outpatient<br>Coef./std.errors | (2)<br>Coef./std.errors |
|--------------|---------------------------------------|-------------------------|
| main         |                                       |                         |
| overweight   | 0.0426<br>(0.0739)                    |                         |
| obese        | 0.0385<br>(0.0772)                    |                         |
| age3544      | 0.7420*<br>(0.3859)                   |                         |
| age4554      | 0.5591*<br>(0.3337)                   |                         |
| age5564      | 0.5462*<br>(0.3084)                   |                         |
| age6574      | 0.1453<br>(0.2927)                    |                         |
| age75plus    | 0.1920<br>(0.2965)                    |                         |
| female       | -0.0721<br>(0.0619)                   |                         |
| smoker       | -0.2203**<br>(0.1024)                 |                         |
| married      | -0.1450**<br>(0.0662)                 |                         |
| black        | -0.2549**<br>(0.1083)                 |                         |
| amind        | -0.3217<br>(0.3166)                   |                         |
| asian        | -0.4647***<br>(0.1628)                |                         |
| othrace      | -0.3868*<br>(0.2156)                  |                         |
| midwest      | 0.0233<br>(0.0958)                    |                         |
| south        | -0.0255<br>(0.0859)                   |                         |
| west         | 0.0477<br>(0.0974)                    |                         |
| lesshischool | -0.3204***<br>(0.0933)                |                         |
| collegeplus  | 0.0451<br>(0.0705)                    |                         |
| poor         | -0.0295<br>(0.1175)                   |                         |
| nearpoor     | -0.0872<br>(0.1504)                   |                         |

|             |           |              |
|-------------|-----------|--------------|
| middleinc   | 0.1655*   |              |
|             | (0.0958)  |              |
| highinc     | 0.3041*** |              |
|             | (0.0950)  |              |
| _bs_1       |           | 2.2651e+09   |
|             |           | (4.4376e+09) |
| _bs_2       |           | 0.0149       |
|             |           | (0.0293)     |
| _cons       | 7.8290*** |              |
|             | (0.3253)  |              |
| <hr/>       |           |              |
| No. of Obs. | 4547.0000 | 4547.0000    |
| R-Squared   |           |              |
| <hr/>       |           |              |

|              | (1)                    | (2)              |
|--------------|------------------------|------------------|
|              | totalexp               |                  |
|              | Coef./std.errors       | Coef./std.errors |
| main         |                        |                  |
| overweight   | 0.0956<br>(0.1176)     |                  |
| obese        | 0.2103*<br>(0.1273)    |                  |
| unins        | -0.4908***<br>(0.1411) |                  |
| medicaid     | 0.4073**<br>(0.1658)   |                  |
| medicare     | 1.2989**<br>(0.5255)   |                  |
| female       | 0.6918***<br>(0.1022)  |                  |
| smoker       | 0.3715**<br>(0.1531)   |                  |
| married      | 0.5643***<br>(0.1183)  |                  |
| black        | -0.3274**<br>(0.1547)  |                  |
| amind        | -0.4447<br>(0.5644)    |                  |
| asian        | -0.3703*<br>(0.1961)   |                  |
| othrace      | -0.1723<br>(0.2584)    |                  |
| midwest      | -0.1059<br>(0.1653)    |                  |
| south        | -0.2135<br>(0.1522)    |                  |
| west         | -0.1463<br>(0.1577)    |                  |
| lesshischool | -0.4055**<br>(0.1612)  |                  |
| collegeplus  | 0.0731<br>(0.1275)     |                  |
| poor         | 0.3173<br>(0.2029)     |                  |
| nearpoor     | -0.3457<br>(0.2722)    |                  |
| middleinc    | -0.1059<br>(0.1738)    |                  |
| highinc      | -0.0519<br>(0.1777)    |                  |

|             |                       |                            |
|-------------|-----------------------|----------------------------|
| _bs_1       |                       | 3.5093e+09<br>(4.3316e+09) |
| _bs_2       |                       | 0.0257<br>(0.0317)         |
| _cons       | 7.1212***<br>(0.2195) |                            |
| No. of Obs. | 6003.0000             | 6003.0000                  |
| R-Squared   |                       |                            |

|              | (1)                    | (2)              |
|--------------|------------------------|------------------|
|              | totalexp               |                  |
|              | Coef./std.errors       | Coef./std.errors |
| main         |                        |                  |
| overweight   | -0.1197<br>(0.1336)    |                  |
| obese        | 0.3724***<br>(0.1358)  |                  |
| unins        | -0.6085***<br>(0.1544) |                  |
| medicaid     | 0.0658<br>(0.1901)     |                  |
| medicare     | 1.8221***<br>(0.3786)  |                  |
| female       | 0.5338***<br>(0.1059)  |                  |
| smoker       | 0.2534<br>(0.1559)     |                  |
| married      | -0.2070*<br>(0.1199)   |                  |
| black        | -0.5280***<br>(0.1648) |                  |
| amind        | 0.4618<br>(0.5239)     |                  |
| asian        | -0.4526**<br>(0.2070)  |                  |
| othrace      | -0.0551<br>(0.3230)    |                  |
| midwest      | 0.1096<br>(0.1781)     |                  |
| south        | 0.3274**<br>(0.1587)   |                  |
| west         | 0.2036<br>(0.1648)     |                  |
| lesshischool | -0.4674**<br>(0.1920)  |                  |
| collegeplus  | -0.0951<br>(0.1345)    |                  |
| poor         | 0.5171**<br>(0.2369)   |                  |
| nearpoor     | 0.5483*<br>(0.3104)    |                  |
| middleinc    | 0.3065*<br>(0.1817)    |                  |
| highinc      | 0.5288***<br>(0.1799)  |                  |

|             |                       |                             |
|-------------|-----------------------|-----------------------------|
| _bs_1       |                       | -3.2686e+09<br>(4.2035e+09) |
| _bs_2       |                       | -0.0280<br>(0.0349)         |
| _cons       | 7.3118***<br>(0.2638) |                             |
| No. of Obs. | 3609.0000             | 3609.0000                   |
| R-Squared   |                       |                             |



|              | (1)<br>totalexp<br>Coef./std.errors | (2)<br>Coef./std.errors |
|--------------|-------------------------------------|-------------------------|
| main         |                                     |                         |
| overweight   | 0.1763<br>(0.1391)                  |                         |
| obese        | 0.3852***<br>(0.1378)               |                         |
| unins        | -0.8727***<br>(0.1836)              |                         |
| medicaid     | -0.1129<br>(0.2237)                 |                         |
| medicare     | 1.2227***<br>(0.2721)               |                         |
| female       | 0.3174***<br>(0.1095)               |                         |
| smoker       | 0.0685<br>(0.1514)                  |                         |
| married      | -0.1791<br>(0.1275)                 |                         |
| black        | -0.1345<br>(0.1731)                 |                         |
| amind        | 0.4063<br>(0.5916)                  |                         |
| asian        | -0.2070<br>(0.2241)                 |                         |
| othrace      | 0.5706<br>(0.3522)                  |                         |
| midwest      | -0.0939<br>(0.1781)                 |                         |
| south        | -0.0334<br>(0.1618)                 |                         |
| west         | -0.2616<br>(0.1731)                 |                         |
| lesshischool | -0.1003<br>(0.1937)                 |                         |
| collegeplus  | 0.3819***<br>(0.1268)               |                         |
| poor         | 0.0263<br>(0.2537)                  |                         |
| nearpoor     | 0.0448<br>(0.3662)                  |                         |
| middleinc    | -0.4198**<br>(0.2053)               |                         |
| highinc      | -0.3395*<br>(0.2034)                |                         |

|             |                       |                            |
|-------------|-----------------------|----------------------------|
| _bs_1       |                       | 8.8032e+09<br>(7.7425e+09) |
| _bs_2       |                       | 0.0521<br>(0.0447)         |
| _cons       | 8.2673***<br>(0.2876) |                            |
| No. of Obs. | 3652.0000             | 3652.0000                  |
| R-Squared   |                       |                            |

|              | (1)                    | (2)              |
|--------------|------------------------|------------------|
|              | totalexp               |                  |
|              | Coef./std.errors       | Coef./std.errors |
| main         |                        |                  |
| overweight   | -0.1478<br>(0.1044)    |                  |
| obese        | 0.1950*<br>(0.1060)    |                  |
| unins        | -0.0645<br>(0.1452)    |                  |
| medicaid     | 0.5003***<br>(0.1590)  |                  |
| medicare     | 0.7979***<br>(0.1511)  |                  |
| female       | 0.0764<br>(0.0841)     |                  |
| smoker       | -0.0492<br>(0.1158)    |                  |
| married      | 0.1435<br>(0.0944)     |                  |
| black        | 0.0114<br>(0.1288)     |                  |
| amind        | -0.6729*<br>(0.3999)   |                  |
| asian        | -0.6642***<br>(0.2054) |                  |
| othrace      | 0.0039<br>(0.2746)     |                  |
| midwest      | 0.0963<br>(0.1326)     |                  |
| south        | 0.0918<br>(0.1207)     |                  |
| west         | 0.0751<br>(0.1329)     |                  |
| lesshischool | -0.1905<br>(0.1450)    |                  |
| collegeplus  | 0.2212**<br>(0.0935)   |                  |
| poor         | 0.1919<br>(0.1880)     |                  |
| nearpoor     | -0.2414<br>(0.2600)    |                  |
| middleinc    | 0.0712<br>(0.1583)     |                  |
| highinc      | 0.0298<br>(0.1536)     |                  |

|             |                       |                             |
|-------------|-----------------------|-----------------------------|
| _bs_1       |                       | -1.1566e+10<br>(1.0476e+10) |
| _bs_2       |                       | -0.0484<br>(0.0433)         |
| _cons       | 8.2674***<br>(0.2118) |                             |
| No. of Obs. | 3353.0000             | 3353.0000                   |
| R-Squared   |                       |                             |

|              | (1)<br>totalexp<br>Coef./std.errors | (2)<br>Coef./std.errors    |
|--------------|-------------------------------------|----------------------------|
| main         |                                     |                            |
| overweight   | 0.0778<br>(0.1040)                  |                            |
| obese        | 0.2716***<br>(0.1039)               |                            |
| female       | 0.0163<br>(0.0854)                  |                            |
| smoker       | -0.1473<br>(0.1314)                 |                            |
| married      | -0.3581***<br>(0.0933)              |                            |
| black        | -0.1546<br>(0.1484)                 |                            |
| amind        | 0.3243<br>(0.5368)                  |                            |
| asian        | -0.1820<br>(0.2075)                 |                            |
| othrace      | -0.0190<br>(0.2746)                 |                            |
| midwest      | 0.2158<br>(0.1356)                  |                            |
| south        | 0.1699<br>(0.1230)                  |                            |
| west         | -0.0560<br>(0.1331)                 |                            |
| lesshischool | -0.0552<br>(0.1387)                 |                            |
| collegeplus  | -0.0357<br>(0.0994)                 |                            |
| poor         | 0.1475<br>(0.1911)                  |                            |
| nearpoor     | 0.1831<br>(0.2390)                  |                            |
| middleinc    | 0.0770<br>(0.1401)                  |                            |
| highinc      | 0.2532*<br>(0.1391)                 |                            |
| _bs_1        |                                     | 5.7951e+09<br>(9.5938e+09) |
| _bs_2        |                                     | 0.0247<br>(0.0403)         |
| _cons        | 8.9751***<br>(0.1957)               |                            |

---

|             |           |           |
|-------------|-----------|-----------|
| No. of Obs. | 2309.0000 | 2309.0000 |
| R-Squared   |           |           |

---

|              | (1)<br>totalexp<br>Coef./std.errors | (2)<br>Coef./std.errors    |
|--------------|-------------------------------------|----------------------------|
| main         |                                     |                            |
| overweight   | 0.0166<br>(0.0866)                  |                            |
| obese        | 0.2884***<br>(0.1023)               |                            |
| female       | -0.0630<br>(0.0826)                 |                            |
| smoker       | -0.4090*<br>(0.2209)                |                            |
| married      | 0.0170<br>(0.0874)                  |                            |
| black        | -0.2261<br>(0.1484)                 |                            |
| amind        | 0.1736<br>(0.4574)                  |                            |
| asian        | -0.6627***<br>(0.2030)              |                            |
| othrace      | -0.6672<br>(0.4626)                 |                            |
| midwest      | -0.0340<br>(0.1154)                 |                            |
| south        | -0.0291<br>(0.1040)                 |                            |
| west         | 0.2125*<br>(0.1210)                 |                            |
| lesshischool | 0.0003<br>(0.1139)                  |                            |
| collegeplus  | -0.1261<br>(0.0879)                 |                            |
| poor         | 0.0300<br>(0.1455)                  |                            |
| nearpoor     | -0.0920<br>(0.1858)                 |                            |
| middleinc    | -0.1334<br>(0.1139)                 |                            |
| highinc      | -0.0499<br>(0.1130)                 |                            |
| _bs_1        |                                     | 1.0207e+09<br>(6.7657e+09) |
| _bs_2        |                                     | 0.0059<br>(0.0384)         |
| _cons        | 9.2590***<br>(0.1568)               |                            |

---

|             |           |           |
|-------------|-----------|-----------|
| No. of Obs. | 1640.0000 | 1640.0000 |
| R-Squared   |           |           |

---



|              | (1)<br>totalexp<br>Coef./std.errors | (2)<br>Coef./std.errors |
|--------------|-------------------------------------|-------------------------|
| main         |                                     |                         |
| overweight   | 0.0518<br>(0.0522)                  |                         |
| obese        | 0.2605***<br>(0.0543)               |                         |
| age3544      | 0.3983***<br>(0.0696)               |                         |
| age4554      | 0.7507***<br>(0.0678)               |                         |
| age5564      | 1.0503***<br>(0.0674)               |                         |
| age6574      | 1.3806***<br>(0.0716)               |                         |
| age75plus    | 1.4767***<br>(0.0821)               |                         |
| female       | 0.3347***<br>(0.0435)               |                         |
| smoker       | 0.1120*<br>(0.0664)                 |                         |
| married      | 0.0203<br>(0.0471)                  |                         |
| black        | -0.2499***<br>(0.0698)              |                         |
| amind        | 0.0549<br>(0.2690)                  |                         |
| asian        | -0.4700***<br>(0.0917)              |                         |
| othrace      | -0.0115<br>(0.1350)                 |                         |
| midwest      | 0.0142<br>(0.0690)                  |                         |
| south        | -0.0073<br>(0.0625)                 |                         |
| west         | -0.0265<br>(0.0673)                 |                         |
| lesshischool | -0.0838<br>(0.0756)                 |                         |
| collegeplus  | 0.1145**<br>(0.0507)                |                         |
| poor         | 0.4044***<br>(0.0967)               |                         |
| nearpoor     | 0.0119<br>(0.1320)                  |                         |

|             |                       |                            |
|-------------|-----------------------|----------------------------|
| middleinc   | -0.0903<br>(0.0769)   |                            |
| highinc     | -0.1049<br>(0.0750)   |                            |
| _bs_1       |                       | 1.6680e+10<br>(2.4777e+10) |
| _bs_2       |                       | 0.0163<br>(0.0241)         |
| _cons       | 7.4595***<br>(0.1027) |                            |
| No. of Obs. | 17196.0000            | 17196.0000                 |
| R-Squared   |                       |                            |

|              | (1)<br>totalexp<br>Coef./std.errors | (2)<br>Coef./std.errors |
|--------------|-------------------------------------|-------------------------|
| main         |                                     |                         |
| overweight   | 0.0328<br>(0.0652)                  |                         |
| obese        | 0.2645***<br>(0.0686)               |                         |
| age3544      | 0.3466***<br>(0.0826)               |                         |
| age4554      | 0.7116***<br>(0.0807)               |                         |
| age5564      | 1.0338***<br>(0.0815)               |                         |
| age6574      | 1.3575***<br>(0.1016)               |                         |
| age75plus    | 1.6255***<br>(0.1231)               |                         |
| female       | 0.4312***<br>(0.0548)               |                         |
| smoker       | 0.1853**<br>(0.0902)                |                         |
| married      | 0.1397**<br>(0.0584)                |                         |
| black        | -0.2332**<br>(0.0933)               |                         |
| amind        | 0.2200<br>(0.3944)                  |                         |
| asian        | -0.4313***<br>(0.1115)              |                         |
| othrace      | 0.0996<br>(0.1714)                  |                         |
| midwest      | -0.0217<br>(0.0863)                 |                         |
| south        | -0.0140<br>(0.0788)                 |                         |
| west         | -0.0343<br>(0.0857)                 |                         |
| lesshischool | -0.0597<br>(0.1132)                 |                         |
| collegeplus  | 0.2129***<br>(0.0634)               |                         |
| poor         | 0.2228<br>(0.1738)                  |                         |
| nearpoor     | 0.0693<br>(0.2328)                  |                         |

|             |                       |                            |
|-------------|-----------------------|----------------------------|
| middleinc   | -0.0613<br>(0.1097)   |                            |
| highinc     | -0.0854<br>(0.1068)   |                            |
| _bs_1       |                       | 6.9209e+09<br>(1.5849e+10) |
| _bs_2       |                       | 0.0105<br>(0.0242)         |
| _cons       | 7.2319***<br>(0.1433) |                            |
| No. of Obs. | 11222.0000            | 11222.0000                 |
| R-Squared   |                       |                            |

|              | (1)                    | (2)              |
|--------------|------------------------|------------------|
|              | totalexp               |                  |
|              | Coef./std.errors       | Coef./std.errors |
| main         |                        |                  |
| overweight   | 0.1459<br>(0.1223)     |                  |
| obese        | 0.2648**<br>(0.1196)   |                  |
| age3544      | 0.3796**<br>(0.1476)   |                  |
| age4554      | 0.7129***<br>(0.1486)  |                  |
| age5564      | 1.1989***<br>(0.1469)  |                  |
| age6574      | 1.6442***<br>(0.1931)  |                  |
| age75plus    | 1.4095***<br>(0.1948)  |                  |
| female       | 0.0864<br>(0.1034)     |                  |
| smoker       | -0.0103<br>(0.1149)    |                  |
| married      | -0.2014*<br>(0.1156)   |                  |
| black        | -0.4125***<br>(0.1255) |                  |
| amind        | -0.6125<br>(0.5036)    |                  |
| asian        | -0.5264**<br>(0.2065)  |                  |
| othrace      | -0.0388<br>(0.2459)    |                  |
| midwest      | 0.0388<br>(0.1485)     |                  |
| south        | 0.0692<br>(0.1425)     |                  |
| west         | -0.3435**<br>(0.1376)  |                  |
| lesshischool | -0.1840<br>(0.1211)    |                  |
| collegeplus  | -0.1012<br>(0.1207)    |                  |
| poor         | 0.3887***<br>(0.1305)  |                  |
| nearpoor     | -0.1142<br>(0.1788)    |                  |

|             |                       |                            |
|-------------|-----------------------|----------------------------|
| middleinc   | 0.0508<br>(0.1515)    |                            |
| highinc     | 0.2635<br>(0.2143)    |                            |
| _bs_1       |                       | 7.2049e+09<br>(8.4683e+09) |
| _bs_2       |                       | 0.0421<br>(0.0487)         |
| _cons       | 7.9736***<br>(0.1739) |                            |
| No. of Obs. | 3772.0000             | 3772.0000                  |
| R-Squared   |                       |                            |

|              | (1)<br>totalexp<br>Coef./std.errors | (2)<br>Coef./std.errors |
|--------------|-------------------------------------|-------------------------|
| main         |                                     |                         |
| overweight   | 0.0525<br>(0.0649)                  |                         |
| obese        | 0.2427***<br>(0.0672)               |                         |
| age3544      | 0.7426**<br>(0.3408)                |                         |
| age4554      | 0.4260<br>(0.2927)                  |                         |
| age5564      | 0.3708<br>(0.2706)                  |                         |
| age6574      | -0.0144<br>(0.2578)                 |                         |
| age75plus    | 0.0292<br>(0.2605)                  |                         |
| female       | 0.0193<br>(0.0550)                  |                         |
| smoker       | -0.0896<br>(0.0920)                 |                         |
| married      | -0.1957***<br>(0.0594)              |                         |
| black        | -0.1140<br>(0.0940)                 |                         |
| amind        | 0.0023<br>(0.2793)                  |                         |
| asian        | -0.3765***<br>(0.1431)              |                         |
| othrace      | -0.1767<br>(0.1891)                 |                         |
| midwest      | 0.0645<br>(0.0840)                  |                         |
| south        | 0.0586<br>(0.0758)                  |                         |
| west         | 0.0274<br>(0.0851)                  |                         |
| lesshischool | -0.0003<br>(0.0829)                 |                         |
| collegeplus  | -0.0374<br>(0.0619)                 |                         |
| poor         | 0.0916<br>(0.1034)                  |                         |
| nearpoor     | -0.0596<br>(0.1333)                 |                         |

|             |                       |                            |
|-------------|-----------------------|----------------------------|
| middleinc   | -0.0006<br>(0.0835)   |                            |
| highinc     | 0.1151<br>(0.0833)    |                            |
| _bs_1       |                       | 8.1994e+09<br>(1.2280e+10) |
| _bs_2       |                       | 0.0167<br>(0.0250)         |
| _cons       | 9.0896***<br>(0.2845) |                            |
| No. of Obs. | 4547.0000             | 4547.0000                  |
| R-Squared   |                       |                            |
